# Supplementary material for: Haplotype-resolved powdery mildew resistance loci reveal the impact of heterozygous structural variation on NLR genes in Muscadinia rotundifolia
Source: PubMed Central journal article supplement (PMC9339307; doi:10.1093/g3journal/jkac148), 2022-06-13
Supplement: jkac148_supplementary_figure_2.pdf [file jkac148_supplementary_figure_2.pdf]

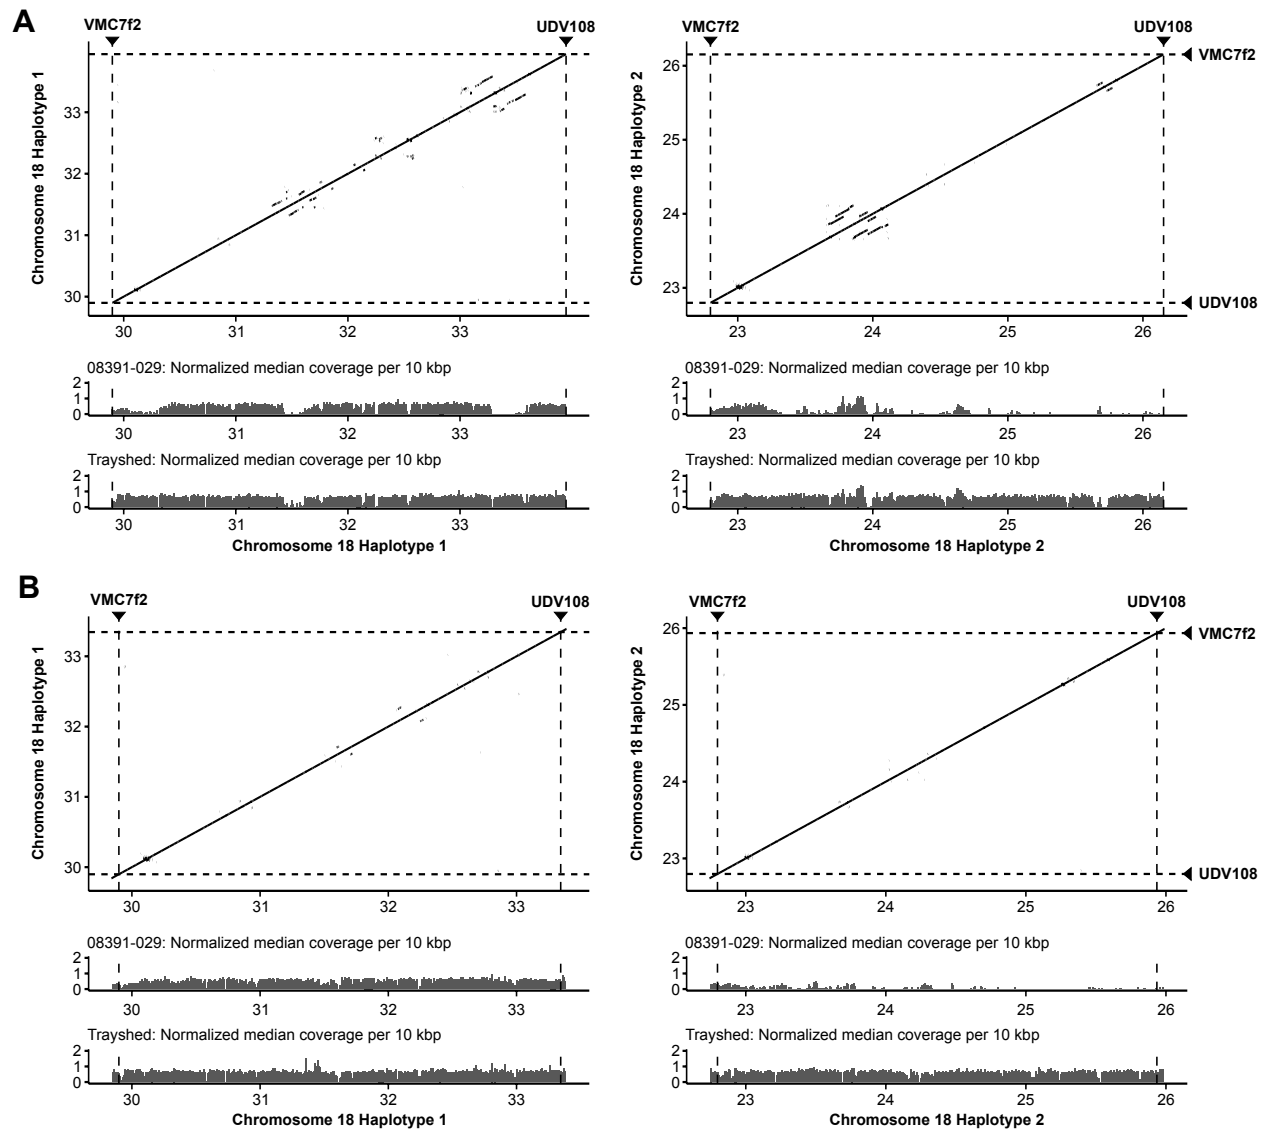

**Supplementary Fig. 2:** Reconstruction of *Run2.2* locus and its alternative haplotype in *M. rotundifolia* Trayshed. Self-comparison of *Run2.2* (chromosome 18 Haplotype 1) and its alternative haplotype (chromosome 18 Haplotype 2) loci, normalized median coverage of DNA-seq reads from 08391-029 (*Run2.2*<sup>+</sup>) and Trayshed (*Run2.2*<sup>+</sup>) before (A) and after (B) reconstruction. Only DNA-seq reads aligning perfectly on the diploid genome of *M. rotundifolia* Trayshed were used for the base coverage analysis. Chromosomal position of the genetic markers VMC7f2 and UDV108 is indicated by black triangles and dashed lines.
