# Supplementary material for: Haplotype-resolved powdery mildew resistance loci reveal the impact of heterozygous structural variation on NLR genes in Muscadinia rotundifolia
Source: PubMed Central journal article supplement (PMC9339307; doi:10.1093/g3journal/jkac148), 2022-06-13
Supplement: jkac148_supplementary_figure_3.pdf [file jkac148_supplementary_figure_3.pdf]

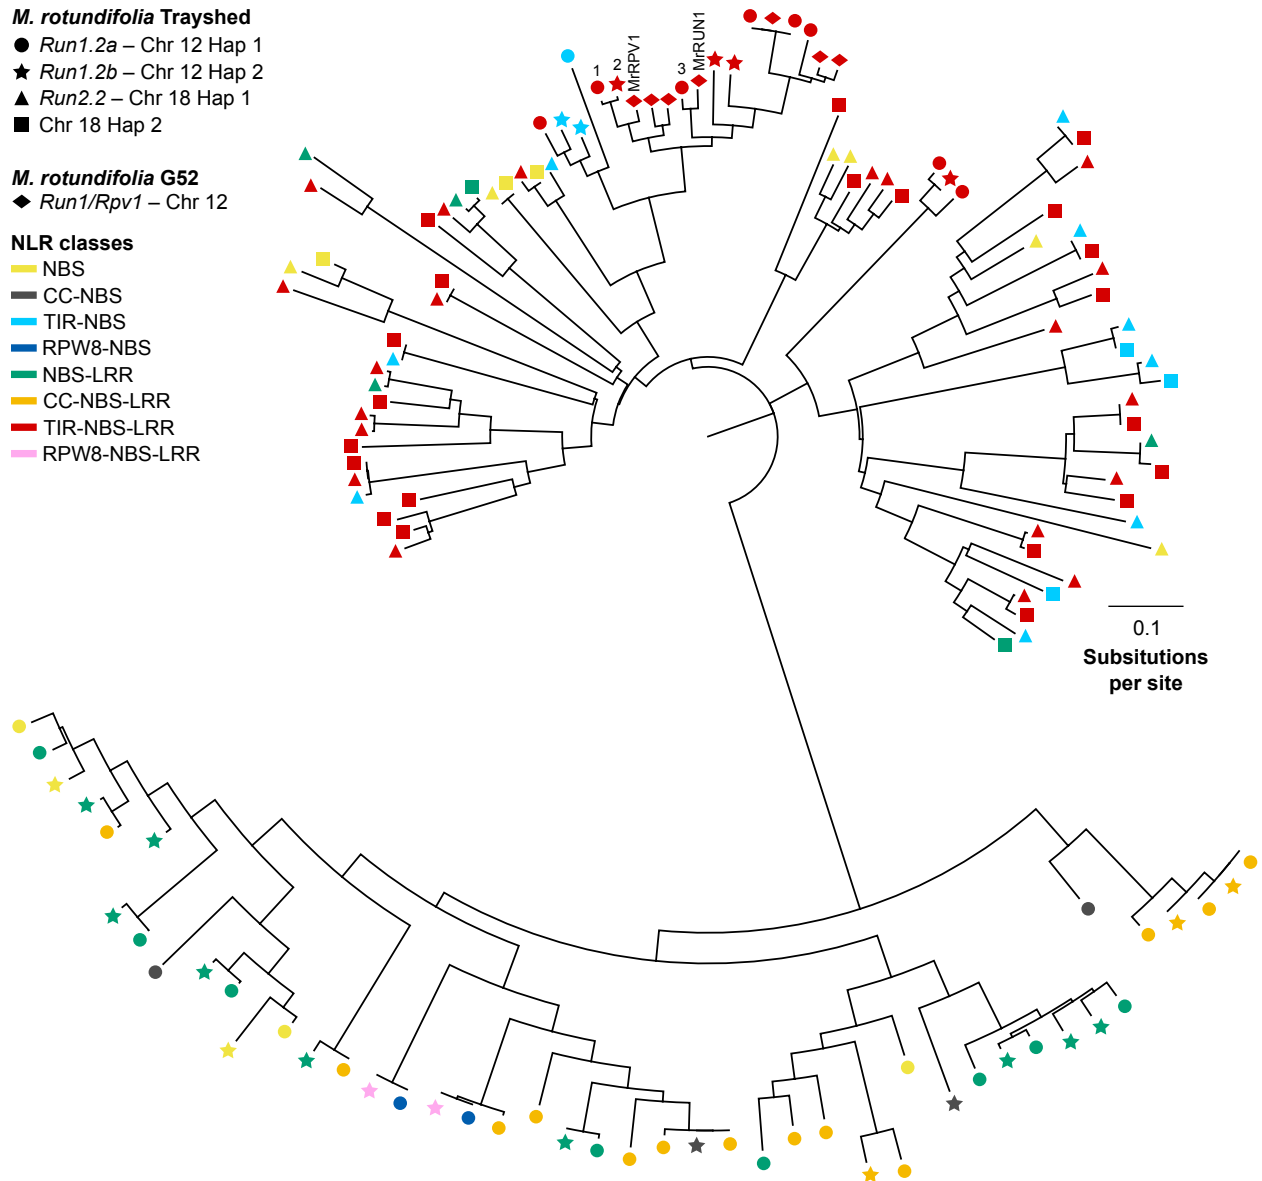

**Supplementary Fig. 3:** Neighbor-joining clustering of the nucleotide-binding domain of the predicted NLR protein sequences of the loci *Run1.2*, *Run2.2* and *Run1/Rpv1* (Feechan *et al.*, 2013).
