# Supplementary material for: Haplotype-resolved powdery mildew resistance loci reveal the impact of heterozygous structural variation on NLR genes in Muscadinia rotundifolia
Source: G3 (Bethesda). 2022 Jun 13;12(8):jkac148. doi: 10.1093/g3journal/jkac148 (PMC9339307; doi:10.1093/g3journal/jkac148)
Supplement: jkac148_Supplementary_Table_1 [file jkac148_supplementary_table_1.xlsx]

## Sheet: Sheet1
Supplementary Table 1: Pedigree information of e6-23 (Run1.2b+) and 08391-029 (Run2.2+) and summary statistics of DNA sequencing.
Grape accession	e6-23	08391-029
R locus	Run1.2b+	Run2.2+
Pedigree	((F2-35 x M. rotundifolia Trayshed) x OP) x F2-35	(((F2-35 x M. rotundifolia Trayshed) x OP) x Palomino) x Malaga Rosada
Quality-filtered & trimmed paired reads	161592946	133842822
Total length (bp)	23725037420	19647183750
Sequencing coverage of diploid genome M. rotundifolia Trayshed (Cochetel et al., 2021)	28.4678	23.5748
*OP = open pollinator
