# Supplementary material for: Haplotype-resolved powdery mildew resistance loci reveal the impact of heterozygous structural variation on NLR genes in Muscadinia rotundifolia
Source: G3 (Bethesda). 2022 Jun 13;12(8):jkac148. doi: 10.1093/g3journal/jkac148 (PMC9339307; doi:10.1093/g3journal/jkac148)
Supplement: jkac148_Supplementary_Table_2 [file jkac148_supplementary_table_2.xlsx]

## Sheet: Sheet1
Supplementary Table 2: Summary statistics of RNA sequencing.
Genotype	R locus	Treatment	Day(s) post inoculation	Bioreplicate	Raw reads	Parsed reads	%
e6-23	Run1.2b+	PM-inoculated	1	1	18550771	18548661	99.9886
e6-23	Run1.2b+	PM-inoculated	1	2	17911979	17909348	99.9853
e6-23	Run1.2b+	PM-inoculated	1	3	15269421	15267219	99.9856
e6-23	Run1.2b+	Mock-inoculated	1	1	16057440	16055303	99.9867
e6-23	Run1.2b+	Mock-inoculated	1	2	14891004	14888492	99.9831
e6-23	Run1.2b+	Mock-inoculated	1	3	18391867	18389530	99.9873
e6-23	Run1.2b+	PM-inoculated	5	1	17640052	17638073	99.9888
e6-23	Run1.2b+	PM-inoculated	5	2	14148341	14146547	99.9873
e6-23	Run1.2b+	PM-inoculated	5	3	17613001	17610831	99.9877
e6-23	Run1.2b+	Mock-inoculated	5	1	14221940	14219609	99.9836
e6-23	Run1.2b+	Mock-inoculated	5	2	14761991	14760227	99.9881
e6-23	Run1.2b+	Mock-inoculated	5	3	14739398	14737160	99.9848
08391-029	Run2.2+	PM-inoculated	1	1	17466249	17464171	99.9881
08391-029	Run2.2+	PM-inoculated	1	2	14333756	14332153	99.9888
08391-029	Run2.2+	PM-inoculated	1	3	22153887	22151549	99.9894
08391-029	Run2.2+	Mock-inoculated	1	1	17854554	17852417	99.988
08391-029	Run2.2+	Mock-inoculated	1	2	16843963	16841507	99.9854
08391-029	Run2.2+	Mock-inoculated	1	3	13718615	13716869	99.9873
08391-029	Run2.2+	PM-inoculated	5	1	13210108	13208066	99.9845
08391-029	Run2.2+	PM-inoculated	5	2	19165904	19163975	99.9899
08391-029	Run2.2+	PM-inoculated	5	3	16294348	16291994	99.9856
08391-029	Run2.2+	Mock-inoculated	5	1	15359297	15356594	99.9824
08391-029	Run2.2+	Mock-inoculated	5	2	17427973	17425410	99.9853
08391-029	Run2.2+	Mock-inoculated	5	3	23541708	23538169	99.985
