# Supplementary material for: Haplotype-resolved powdery mildew resistance loci reveal the impact of heterozygous structural variation on NLR genes in Muscadinia rotundifolia
Source: G3 (Bethesda). 2022 Jun 13;12(8):jkac148. doi: 10.1093/g3journal/jkac148 (PMC9339307; doi:10.1093/g3journal/jkac148)
Supplement: jkac148_Supplementary_Table_3 [file jkac148_supplementary_table_3.xlsx]

## Sheet: Sheet1
Supplementary Table 3: Domain composition of the NLRs identified at Run1.2 and Run2.2.
CDS ID	chromosome	start	stop	strand	NLR class	Annotator	Protein length (AA)	Query domain name	Pfam accession	Query length	i-Evalue	Coverage of the HMM	from	to
VITMroTrayshed_v2.0.hap1.chr12.ver2.0.g154460.t01	VITMroTrayshed_v2.1.hap1.chr12	11819344	11824191	+	TIR-NBS-LRR	EVM	866	TIR	PF01582.21	176	1.6e-45	92.0455	24	189
VITMroTrayshed_v2.0.hap1.chr12.ver2.0.g154460.t01	VITMroTrayshed_v2.1.hap1.chr12	11819344	11824191	+	TIR-NBS-LRR	EVM	866	TIR_2	PF13676.7	121	2.5e-13	76.8595	26	119
VITMroTrayshed_v2.0.hap1.chr12.ver2.0.g154460.t01	VITMroTrayshed_v2.1.hap1.chr12	11819344	11824191	+	TIR-NBS-LRR	EVM	866	NB-ARC	PF00931.23	252	3.3e-32	96.0317	203	441
VITMroTrayshed_v2.0.hap1.chr12.ver2.0.g154460.t01	VITMroTrayshed_v2.1.hap1.chr12	11819344	11824191	+	TIR-NBS-LRR	EVM	866	LRR_3	PF07725.13	20	0.00095	100	636	655
VITMroTrayshed_v2.0.hap1.chr12.ver2.0.g154460.t01	VITMroTrayshed_v2.1.hap1.chr12	11819344	11824191	+	TIR-NBS-LRR	EVM	866	LRR_8	PF13855.7	61	2.2e-05	95.082	636	691
VITMroTrayshed_v2.0.hap1.chr12.ver2.0.g154460.t01	VITMroTrayshed_v2.1.hap1.chr12	11819344	11824191	+	TIR-NBS-LRR	EVM	866	LRR_4	PF12799.8	43	0.13	93.0233	681	723
VITMroTrayshed_v2.0.hap1.chr12.ver2.0.g154460.t01	VITMroTrayshed_v2.1.hap1.chr12	11819344	11824191	+	TIR-NBS-LRR	EVM	866	LRR_8	PF13855.7	61	0.11	68.8525	698	738
VITMroTrayshed_v2.0.hap1.chr12.ver2.0.g154460.t01	VITMroTrayshed_v2.1.hap1.chr12	11819344	11824191	+	TIR-NBS-LRR	EVM	866	LRR_4	PF12799.8	43	0.082	86.0465	705	744
VITMroTrayshed_v2.0.hap1.chr12.ver2.0.g154460.t01	VITMroTrayshed_v2.1.hap1.chr12	11819344	11824191	+	TIR-NBS-LRR	EVM	866	LRR_8	PF13855.7	61	0.00049	62.2951	750	786
VITMroTrayshed_v2.0.hap1.chr12.ver2.0.g154460.t01	VITMroTrayshed_v2.1.hap1.chr12	11819344	11824191	+	TIR-NBS-LRR	EVM	866	LRR_4	PF12799.8	43	0.00031	88.3721	753	792
VITMroTrayshed_v2.0.hap1.chr12.ver2.0.g154460.t01	VITMroTrayshed_v2.1.hap1.chr12	11819344	11824191	+	TIR-NBS-LRR	EVM	866	LRR_8	PF13855.7	61	0.00035	62.2951	797	833
VITMroTrayshed_v2.0.hap1.chr12.ver2.0.g154460.t01	VITMroTrayshed_v2.1.hap1.chr12	11819344	11824191	+	TIR-NBS-LRR	EVM	866	LRR_4	PF12799.8	43	8.3e-05	81.3953	800	836
VITMroTrayshed_v2.0.hap1.chr12.ver2.0.g154500.t01	VITMroTrayshed_v2.1.hap1.chr12	11897381	11904250	+	TIR-NBS-LRR	.	1534	TIR	PF01582.21	176	3.9e-46	92.0455	26	189
VITMroTrayshed_v2.0.hap1.chr12.ver2.0.g154500.t01	VITMroTrayshed_v2.1.hap1.chr12	11897381	11904250	+	TIR-NBS-LRR	.	1534	TIR_2	PF13676.7	121	4.5e-13	80.9917	28	123
VITMroTrayshed_v2.0.hap1.chr12.ver2.0.g154500.t01	VITMroTrayshed_v2.1.hap1.chr12	11897381	11904250	+	TIR-NBS-LRR	.	1534	NB-ARC	PF00931.23	252	1.5e-33	92.0635	203	431
VITMroTrayshed_v2.0.hap1.chr12.ver2.0.g154500.t01	VITMroTrayshed_v2.1.hap1.chr12	11897381	11904250	+	TIR-NBS-LRR	.	1534	LRR_3	PF07725.13	20	0.57	100	635	654
VITMroTrayshed_v2.0.hap1.chr12.ver2.0.g154500.t01	VITMroTrayshed_v2.1.hap1.chr12	11897381	11904250	+	TIR-NBS-LRR	.	1534	LRR_8	PF13855.7	61	0.0006	93.4426	636	690
VITMroTrayshed_v2.0.hap1.chr12.ver2.0.g154500.t01	VITMroTrayshed_v2.1.hap1.chr12	11897381	11904250	+	TIR-NBS-LRR	.	1534	LRR_4	PF12799.8	43	0.22	86.0465	658	696
VITMroTrayshed_v2.0.hap1.chr12.ver2.0.g154500.t01	VITMroTrayshed_v2.1.hap1.chr12	11897381	11904250	+	TIR-NBS-LRR	.	1534	LRR_8	PF13855.7	61	0.11	72.1311	696	738
VITMroTrayshed_v2.0.hap1.chr12.ver2.0.g154500.t01	VITMroTrayshed_v2.1.hap1.chr12	11897381	11904250	+	TIR-NBS-LRR	.	1534	LRR_4	PF12799.8	43	0.066	88.3721	704	744
VITMroTrayshed_v2.0.hap1.chr12.ver2.0.g154500.t01	VITMroTrayshed_v2.1.hap1.chr12	11897381	11904250	+	TIR-NBS-LRR	.	1534	LRR_8	PF13855.7	61	0.0043	62.2951	749	785
VITMroTrayshed_v2.0.hap1.chr12.ver2.0.g154500.t01	VITMroTrayshed_v2.1.hap1.chr12	11897381	11904250	+	TIR-NBS-LRR	.	1534	LRR_4	PF12799.8	43	0.0038	76.7442	757	791
VITMroTrayshed_v2.0.hap1.chr12.ver2.0.g154500.t01	VITMroTrayshed_v2.1.hap1.chr12	11897381	11904250	+	TIR-NBS-LRR	.	1534	LRR_8	PF13855.7	61	0.00051	62.2951	796	832
VITMroTrayshed_v2.0.hap1.chr12.ver2.0.g154500.t01	VITMroTrayshed_v2.1.hap1.chr12	11897381	11904250	+	TIR-NBS-LRR	.	1534	LRR_4	PF12799.8	43	0.0041	76.7442	804	838
VITMroTrayshed_v2.0.hap1.chr12.ver2.0.g154500.t01	VITMroTrayshed_v2.1.hap1.chr12	11897381	11904250	+	TIR-NBS-LRR	.	1534	LRR_8	PF13855.7	61	0.00073	62.2951	843	879
VITMroTrayshed_v2.0.hap1.chr12.ver2.0.g154500.t01	VITMroTrayshed_v2.1.hap1.chr12	11897381	11904250	+	TIR-NBS-LRR	.	1534	LRR_4	PF12799.8	43	0.001	88.3721	846	885
VITMroTrayshed_v2.0.hap1.chr12.ver2.0.g154500.t01	VITMroTrayshed_v2.1.hap1.chr12	11897381	11904250	+	TIR-NBS-LRR	.	1534	LRR_8	PF13855.7	61	0.0023	62.2951	890	926
VITMroTrayshed_v2.0.hap1.chr12.ver2.0.g154500.t01	VITMroTrayshed_v2.1.hap1.chr12	11897381	11904250	+	TIR-NBS-LRR	.	1534	LRR_4	PF12799.8	43	0.0024	88.3721	893	932
VITMroTrayshed_v2.0.hap1.chr12.ver2.0.g154500.t01	VITMroTrayshed_v2.1.hap1.chr12	11897381	11904250	+	TIR-NBS-LRR	.	1534	LRR_8	PF13855.7	61	0.00079	62.2951	937	973
VITMroTrayshed_v2.0.hap1.chr12.ver2.0.g154500.t01	VITMroTrayshed_v2.1.hap1.chr12	11897381	11904250	+	TIR-NBS-LRR	.	1534	LRR_4	PF12799.8	43	0.0011	83.7209	940	977
VITMroTrayshed_v2.0.hap1.chr12.ver2.0.g154500.t01	VITMroTrayshed_v2.1.hap1.chr12	11897381	11904250	+	TIR-NBS-LRR	.	1534	LRR_8	PF13855.7	61	0.00087	60.6557	985	1020
VITMroTrayshed_v2.0.hap1.chr12.ver2.0.g154500.t01	VITMroTrayshed_v2.1.hap1.chr12	11897381	11904250	+	TIR-NBS-LRR	.	1534	LRR_4	PF12799.8	43	0.00044	86.0465	988	1026
VITMroTrayshed_v2.0.hap1.chr12.ver2.0.g154500.t01	VITMroTrayshed_v2.1.hap1.chr12	11897381	11904250	+	TIR-NBS-LRR	.	1534	LRR_8	PF13855.7	61	7.3e-05	62.2951	1031	1067
VITMroTrayshed_v2.0.hap1.chr12.ver2.0.g154500.t01	VITMroTrayshed_v2.1.hap1.chr12	11897381	11904250	+	TIR-NBS-LRR	.	1534	LRR_4	PF12799.8	43	0.00075	88.3721	1034	1073
VITMroTrayshed_v2.0.hap1.chr12.ver2.0.g154500.t01	VITMroTrayshed_v2.1.hap1.chr12	11897381	11904250	+	TIR-NBS-LRR	.	1534	LRR_8	PF13855.7	61	0.00098	62.2951	1078	1114
VITMroTrayshed_v2.0.hap1.chr12.ver2.0.g154500.t01	VITMroTrayshed_v2.1.hap1.chr12	11897381	11904250	+	TIR-NBS-LRR	.	1534	LRR_4	PF12799.8	43	0.0006	88.3721	1081	1120
VITMroTrayshed_v2.0.hap1.chr12.ver2.0.g154500.t01	VITMroTrayshed_v2.1.hap1.chr12	11897381	11904250	+	TIR-NBS-LRR	.	1534	LRR_8	PF13855.7	61	0.0025	62.2951	1125	1161
VITMroTrayshed_v2.0.hap1.chr12.ver2.0.g154500.t01	VITMroTrayshed_v2.1.hap1.chr12	11897381	11904250	+	TIR-NBS-LRR	.	1534	LRR_4	PF12799.8	43	0.0065	88.3721	1128	1167
VITMroTrayshed_v2.0.hap1.chr12.ver2.0.g154500.t01	VITMroTrayshed_v2.1.hap1.chr12	11897381	11904250	+	TIR-NBS-LRR	.	1534	LRR_8	PF13855.7	61	0.0071	62.2951	1172	1208
VITMroTrayshed_v2.0.hap1.chr12.ver2.0.g154500.t01	VITMroTrayshed_v2.1.hap1.chr12	11897381	11904250	+	TIR-NBS-LRR	.	1534	LRR_4	PF12799.8	43	0.039	86.0465	1175	1213
VITMroTrayshed_v2.0.hap1.chr12.ver2.0.g154500.t01	VITMroTrayshed_v2.1.hap1.chr12	11897381	11904250	+	TIR-NBS-LRR	.	1534	LRR_8	PF13855.7	61	0.022	60.6557	1220	1255
VITMroTrayshed_v2.0.hap1.chr12.ver2.0.g154500.t01	VITMroTrayshed_v2.1.hap1.chr12	11897381	11904250	+	TIR-NBS-LRR	.	1534	LRR_4	PF12799.8	43	0.34	65.1163	1227	1255
VITMroTrayshed_v2.0.hap1.chr12.ver2.0.g154500.t01	VITMroTrayshed_v2.1.hap1.chr12	11897381	11904250	+	TIR-NBS-LRR	.	1534	LRR_8	PF13855.7	61	5.4e-05	62.2951	1266	1302
VITMroTrayshed_v2.0.hap1.chr12.ver2.0.g154500.t01	VITMroTrayshed_v2.1.hap1.chr12	11897381	11904250	+	TIR-NBS-LRR	.	1534	LRR_4	PF12799.8	43	0.0035	79.0698	1269	1304
VITMroTrayshed_v2.0.hap1.chr12.ver2.0.g154500.t02	VITMroTrayshed_v2.1.hap1.chr12	11897381	11904250	+	TIR-NBS-LRR	.	1534	TIR	PF01582.21	176	3.9e-46	92.0455	26	189
VITMroTrayshed_v2.0.hap1.chr12.ver2.0.g154500.t02	VITMroTrayshed_v2.1.hap1.chr12	11897381	11904250	+	TIR-NBS-LRR	.	1534	TIR_2	PF13676.7	121	4.5e-13	80.9917	28	123
VITMroTrayshed_v2.0.hap1.chr12.ver2.0.g154500.t02	VITMroTrayshed_v2.1.hap1.chr12	11897381	11904250	+	TIR-NBS-LRR	.	1534	NB-ARC	PF00931.23	252	1.5e-33	92.0635	203	431
VITMroTrayshed_v2.0.hap1.chr12.ver2.0.g154500.t02	VITMroTrayshed_v2.1.hap1.chr12	11897381	11904250	+	TIR-NBS-LRR	.	1534	LRR_3	PF07725.13	20	0.57	100	635	654
VITMroTrayshed_v2.0.hap1.chr12.ver2.0.g154500.t02	VITMroTrayshed_v2.1.hap1.chr12	11897381	11904250	+	TIR-NBS-LRR	.	1534	LRR_8	PF13855.7	61	0.0006	93.4426	636	690
VITMroTrayshed_v2.0.hap1.chr12.ver2.0.g154500.t02	VITMroTrayshed_v2.1.hap1.chr12	11897381	11904250	+	TIR-NBS-LRR	.	1534	LRR_4	PF12799.8	43	0.22	86.0465	658	696
VITMroTrayshed_v2.0.hap1.chr12.ver2.0.g154500.t02	VITMroTrayshed_v2.1.hap1.chr12	11897381	11904250	+	TIR-NBS-LRR	.	1534	LRR_8	PF13855.7	61	0.11	72.1311	696	738
VITMroTrayshed_v2.0.hap1.chr12.ver2.0.g154500.t02	VITMroTrayshed_v2.1.hap1.chr12	11897381	11904250	+	TIR-NBS-LRR	.	1534	LRR_4	PF12799.8	43	0.066	88.3721	704	744
VITMroTrayshed_v2.0.hap1.chr12.ver2.0.g154500.t02	VITMroTrayshed_v2.1.hap1.chr12	11897381	11904250	+	TIR-NBS-LRR	.	1534	LRR_8	PF13855.7	61	0.0043	62.2951	749	785
VITMroTrayshed_v2.0.hap1.chr12.ver2.0.g154500.t02	VITMroTrayshed_v2.1.hap1.chr12	11897381	11904250	+	TIR-NBS-LRR	.	1534	LRR_4	PF12799.8	43	0.0038	76.7442	757	791
VITMroTrayshed_v2.0.hap1.chr12.ver2.0.g154500.t02	VITMroTrayshed_v2.1.hap1.chr12	11897381	11904250	+	TIR-NBS-LRR	.	1534	LRR_8	PF13855.7	61	0.00051	62.2951	796	832
VITMroTrayshed_v2.0.hap1.chr12.ver2.0.g154500.t02	VITMroTrayshed_v2.1.hap1.chr12	11897381	11904250	+	TIR-NBS-LRR	.	1534	LRR_4	PF12799.8	43	0.0041	76.7442	804	838
VITMroTrayshed_v2.0.hap1.chr12.ver2.0.g154500.t02	VITMroTrayshed_v2.1.hap1.chr12	11897381	11904250	+	TIR-NBS-LRR	.	1534	LRR_8	PF13855.7	61	0.00073	62.2951	843	879
VITMroTrayshed_v2.0.hap1.chr12.ver2.0.g154500.t02	VITMroTrayshed_v2.1.hap1.chr12	11897381	11904250	+	TIR-NBS-LRR	.	1534	LRR_4	PF12799.8	43	0.001	88.3721	846	885
VITMroTrayshed_v2.0.hap1.chr12.ver2.0.g154500.t02	VITMroTrayshed_v2.1.hap1.chr12	11897381	11904250	+	TIR-NBS-LRR	.	1534	LRR_8	PF13855.7	61	0.0023	62.2951	890	926
VITMroTrayshed_v2.0.hap1.chr12.ver2.0.g154500.t02	VITMroTrayshed_v2.1.hap1.chr12	11897381	11904250	+	TIR-NBS-LRR	.	1534	LRR_4	PF12799.8	43	0.0024	88.3721	893	932
VITMroTrayshed_v2.0.hap1.chr12.ver2.0.g154500.t02	VITMroTrayshed_v2.1.hap1.chr12	11897381	11904250	+	TIR-NBS-LRR	.	1534	LRR_8	PF13855.7	61	0.00079	62.2951	937	973
VITMroTrayshed_v2.0.hap1.chr12.ver2.0.g154500.t02	VITMroTrayshed_v2.1.hap1.chr12	11897381	11904250	+	TIR-NBS-LRR	.	1534	LRR_4	PF12799.8	43	0.0011	83.7209	940	977
VITMroTrayshed_v2.0.hap1.chr12.ver2.0.g154500.t02	VITMroTrayshed_v2.1.hap1.chr12	11897381	11904250	+	TIR-NBS-LRR	.	1534	LRR_8	PF13855.7	61	0.00087	60.6557	985	1020
VITMroTrayshed_v2.0.hap1.chr12.ver2.0.g154500.t02	VITMroTrayshed_v2.1.hap1.chr12	11897381	11904250	+	TIR-NBS-LRR	.	1534	LRR_4	PF12799.8	43	0.00044	86.0465	988	1026
VITMroTrayshed_v2.0.hap1.chr12.ver2.0.g154500.t02	VITMroTrayshed_v2.1.hap1.chr12	11897381	11904250	+	TIR-NBS-LRR	.	1534	LRR_8	PF13855.7	61	7.3e-05	62.2951	1031	1067
VITMroTrayshed_v2.0.hap1.chr12.ver2.0.g154500.t02	VITMroTrayshed_v2.1.hap1.chr12	11897381	11904250	+	TIR-NBS-LRR	.	1534	LRR_4	PF12799.8	43	0.00075	88.3721	1034	1073
VITMroTrayshed_v2.0.hap1.chr12.ver2.0.g154500.t02	VITMroTrayshed_v2.1.hap1.chr12	11897381	11904250	+	TIR-NBS-LRR	.	1534	LRR_8	PF13855.7	61	0.00098	62.2951	1078	1114
VITMroTrayshed_v2.0.hap1.chr12.ver2.0.g154500.t02	VITMroTrayshed_v2.1.hap1.chr12	11897381	11904250	+	TIR-NBS-LRR	.	1534	LRR_4	PF12799.8	43	0.0006	88.3721	1081	1120
VITMroTrayshed_v2.0.hap1.chr12.ver2.0.g154500.t02	VITMroTrayshed_v2.1.hap1.chr12	11897381	11904250	+	TIR-NBS-LRR	.	1534	LRR_8	PF13855.7	61	0.0025	62.2951	1125	1161
VITMroTrayshed_v2.0.hap1.chr12.ver2.0.g154500.t02	VITMroTrayshed_v2.1.hap1.chr12	11897381	11904250	+	TIR-NBS-LRR	.	1534	LRR_4	PF12799.8	43	0.0065	88.3721	1128	1167
VITMroTrayshed_v2.0.hap1.chr12.ver2.0.g154500.t02	VITMroTrayshed_v2.1.hap1.chr12	11897381	11904250	+	TIR-NBS-LRR	.	1534	LRR_8	PF13855.7	61	0.0071	62.2951	1172	1208
VITMroTrayshed_v2.0.hap1.chr12.ver2.0.g154500.t02	VITMroTrayshed_v2.1.hap1.chr12	11897381	11904250	+	TIR-NBS-LRR	.	1534	LRR_4	PF12799.8	43	0.039	86.0465	1175	1213
VITMroTrayshed_v2.0.hap1.chr12.ver2.0.g154500.t02	VITMroTrayshed_v2.1.hap1.chr12	11897381	11904250	+	TIR-NBS-LRR	.	1534	LRR_8	PF13855.7	61	0.022	60.6557	1220	1255
VITMroTrayshed_v2.0.hap1.chr12.ver2.0.g154500.t02	VITMroTrayshed_v2.1.hap1.chr12	11897381	11904250	+	TIR-NBS-LRR	.	1534	LRR_4	PF12799.8	43	0.34	65.1163	1227	1255
VITMroTrayshed_v2.0.hap1.chr12.ver2.0.g154500.t02	VITMroTrayshed_v2.1.hap1.chr12	11897381	11904250	+	TIR-NBS-LRR	.	1534	LRR_8	PF13855.7	61	5.4e-05	62.2951	1266	1302
VITMroTrayshed_v2.0.hap1.chr12.ver2.0.g154500.t02	VITMroTrayshed_v2.1.hap1.chr12	11897381	11904250	+	TIR-NBS-LRR	.	1534	LRR_4	PF12799.8	43	0.0035	79.0698	1269	1304
VITMroTrayshed_v2.0.hap1.chr12.ver2.1.g154990.t01	VITMroTrayshed_v2.1.hap1.chr12	12139871	12146172	+	TIR-NBS-LRR	manual	1344	TIR	PF01582.21	176	8.1e-46	92.0455	24	189
VITMroTrayshed_v2.0.hap1.chr12.ver2.1.g154990.t01	VITMroTrayshed_v2.1.hap1.chr12	12139871	12146172	+	TIR-NBS-LRR	manual	1344	TIR_2	PF13676.7	121	6e-13	76.8595	26	119
VITMroTrayshed_v2.0.hap1.chr12.ver2.1.g154990.t01	VITMroTrayshed_v2.1.hap1.chr12	12139871	12146172	+	TIR-NBS-LRR	manual	1344	NB-ARC	PF00931.23	252	6.9e-32	96.0317	203	441
VITMroTrayshed_v2.0.hap1.chr12.ver2.1.g154990.t01	VITMroTrayshed_v2.1.hap1.chr12	12139871	12146172	+	TIR-NBS-LRR	manual	1344	LRR_3	PF07725.13	20	0.0015	100	632	651
VITMroTrayshed_v2.0.hap1.chr12.ver2.1.g154990.t01	VITMroTrayshed_v2.1.hap1.chr12	12139871	12146172	+	TIR-NBS-LRR	manual	1344	LRR_8	PF13855.7	61	0.00013	91.8033	632	685
VITMroTrayshed_v2.0.hap1.chr12.ver2.1.g154990.t01	VITMroTrayshed_v2.1.hap1.chr12	12139871	12146172	+	TIR-NBS-LRR	manual	1344	LRR_4	PF12799.8	43	0.28	93.0233	677	719
VITMroTrayshed_v2.0.hap1.chr12.ver2.1.g154990.t01	VITMroTrayshed_v2.1.hap1.chr12	12139871	12146172	+	TIR-NBS-LRR	manual	1344	LRR_8	PF13855.7	61	0.0028	96.7213	677	735
VITMroTrayshed_v2.0.hap1.chr12.ver2.1.g154990.t01	VITMroTrayshed_v2.1.hap1.chr12	12139871	12146172	+	TIR-NBS-LRR	manual	1344	LRR_4	PF12799.8	43	0.21	76.7442	701	735
VITMroTrayshed_v2.0.hap1.chr12.ver2.1.g154990.t01	VITMroTrayshed_v2.1.hap1.chr12	12139871	12146172	+	TIR-NBS-LRR	manual	1344	LRR_8	PF13855.7	61	0.016	60.6557	747	782
VITMroTrayshed_v2.0.hap1.chr12.ver2.1.g154990.t01	VITMroTrayshed_v2.1.hap1.chr12	12139871	12146172	+	TIR-NBS-LRR	manual	1344	LRR_4	PF12799.8	43	0.61	74.4186	754	787
VITMroTrayshed_v2.0.hap1.chr12.ver2.1.g154990.t01	VITMroTrayshed_v2.1.hap1.chr12	12139871	12146172	+	TIR-NBS-LRR	manual	1344	LRR_8	PF13855.7	61	0.0024	60.6557	794	829
VITMroTrayshed_v2.0.hap1.chr12.ver2.1.g154990.t01	VITMroTrayshed_v2.1.hap1.chr12	12139871	12146172	+	TIR-NBS-LRR	manual	1344	LRR_4	PF12799.8	43	0.0065	88.3721	796	835
VITMroTrayshed_v2.0.hap1.chr12.ver2.1.g154990.t01	VITMroTrayshed_v2.1.hap1.chr12	12139871	12146172	+	TIR-NBS-LRR	manual	1344	LRR_8	PF13855.7	61	0.0061	62.2951	840	876
VITMroTrayshed_v2.0.hap1.chr12.ver2.1.g154990.t01	VITMroTrayshed_v2.1.hap1.chr12	12139871	12146172	+	TIR-NBS-LRR	manual	1344	LRR_4	PF12799.8	43	0.0017	88.3721	843	882
VITMroTrayshed_v2.0.hap1.chr12.ver2.1.g154990.t01	VITMroTrayshed_v2.1.hap1.chr12	12139871	12146172	+	TIR-NBS-LRR	manual	1344	LRR_8	PF13855.7	61	0.011	62.2951	887	923
VITMroTrayshed_v2.0.hap1.chr12.ver2.1.g154990.t01	VITMroTrayshed_v2.1.hap1.chr12	12139871	12146172	+	TIR-NBS-LRR	manual	1344	LRR_4	PF12799.8	43	0.0053	88.3721	890	929
VITMroTrayshed_v2.0.hap1.chr12.ver2.1.g154990.t01	VITMroTrayshed_v2.1.hap1.chr12	12139871	12146172	+	TIR-NBS-LRR	manual	1344	LRR_8	PF13855.7	61	0.00043	81.9672	923	970
VITMroTrayshed_v2.0.hap1.chr12.ver2.1.g154990.t01	VITMroTrayshed_v2.1.hap1.chr12	12139871	12146172	+	TIR-NBS-LRR	manual	1344	LRR_4	PF12799.8	43	0.0014	88.3721	937	976
VITMroTrayshed_v2.0.hap1.chr12.ver2.1.g154990.t01	VITMroTrayshed_v2.1.hap1.chr12	12139871	12146172	+	TIR-NBS-LRR	manual	1344	LRR_8	PF13855.7	61	4.6e-05	62.2951	981	1017
VITMroTrayshed_v2.0.hap1.chr12.ver2.1.g154990.t01	VITMroTrayshed_v2.1.hap1.chr12	12139871	12146172	+	TIR-NBS-LRR	manual	1344	LRR_4	PF12799.8	43	0.0015	76.7442	984	1017
VITMroTrayshed_v2.0.hap1.chr12.ver2.1.g155070.t01	VITMroTrayshed_v2.1.hap1.chr12	12244558	12247251	+	TIR-NBS	manual	354	TIR	PF01582.21	176	1.2e-44	90.3409	25	185
VITMroTrayshed_v2.0.hap1.chr12.ver2.1.g155070.t01	VITMroTrayshed_v2.1.hap1.chr12	12244558	12247251	+	TIR-NBS	manual	354	TIR_2	PF13676.7	121	2e-13	80.9917	27	122
VITMroTrayshed_v2.0.hap1.chr12.ver2.1.g155070.t01	VITMroTrayshed_v2.1.hap1.chr12	12244558	12247251	+	TIR-NBS	manual	354	NB-ARC	PF00931.23	252	1.6e-15	55.5556	202	340
VITMroTrayshed_v2.0.hap1.chr12.ver2.0.g155340.t01	VITMroTrayshed_v2.1.hap1.chr12	12379558	12385915	+	TIR-NBS-LRR	.	1341	TIR	PF01582.21	176	4.8e-47	91.4773	24	187
VITMroTrayshed_v2.0.hap1.chr12.ver2.0.g155340.t01	VITMroTrayshed_v2.1.hap1.chr12	12379558	12385915	+	TIR-NBS-LRR	.	1341	TIR_2	PF13676.7	121	4.3e-13	80.9917	26	121
VITMroTrayshed_v2.0.hap1.chr12.ver2.0.g155340.t01	VITMroTrayshed_v2.1.hap1.chr12	12379558	12385915	+	TIR-NBS-LRR	.	1341	NB-ARC	PF00931.23	252	1.6e-33	90.873	201	426
VITMroTrayshed_v2.0.hap1.chr12.ver2.0.g155340.t01	VITMroTrayshed_v2.1.hap1.chr12	12379558	12385915	+	TIR-NBS-LRR	.	1341	LRR_3	PF07725.13	20	0.00092	90	635	652
VITMroTrayshed_v2.0.hap1.chr12.ver2.0.g155340.t01	VITMroTrayshed_v2.1.hap1.chr12	12379558	12385915	+	TIR-NBS-LRR	.	1341	LRR_8	PF13855.7	61	0.00097	90.1639	635	687
VITMroTrayshed_v2.0.hap1.chr12.ver2.0.g155340.t01	VITMroTrayshed_v2.1.hap1.chr12	12379558	12385915	+	TIR-NBS-LRR	.	1341	LRR_4	PF12799.8	43	0.26	76.7442	658	692
VITMroTrayshed_v2.0.hap1.chr12.ver2.0.g155340.t01	VITMroTrayshed_v2.1.hap1.chr12	12379558	12385915	+	TIR-NBS-LRR	.	1341	LRR_8	PF13855.7	61	0.0012	85.2459	688	738
VITMroTrayshed_v2.0.hap1.chr12.ver2.0.g155340.t01	VITMroTrayshed_v2.1.hap1.chr12	12379558	12385915	+	TIR-NBS-LRR	.	1341	LRR_4	PF12799.8	43	0.0057	88.3721	704	744
VITMroTrayshed_v2.0.hap1.chr12.ver2.0.g155340.t01	VITMroTrayshed_v2.1.hap1.chr12	12379558	12385915	+	TIR-NBS-LRR	.	1341	LRR_8	PF13855.7	61	0.0062	60.6557	750	785
VITMroTrayshed_v2.0.hap1.chr12.ver2.0.g155340.t01	VITMroTrayshed_v2.1.hap1.chr12	12379558	12385915	+	TIR-NBS-LRR	.	1341	LRR_4	PF12799.8	43	0.00044	88.3721	752	791
VITMroTrayshed_v2.0.hap1.chr12.ver2.0.g155340.t01	VITMroTrayshed_v2.1.hap1.chr12	12379558	12385915	+	TIR-NBS-LRR	.	1341	LRR_8	PF13855.7	61	0.00017	62.2951	796	832
VITMroTrayshed_v2.0.hap1.chr12.ver2.0.g155340.t01	VITMroTrayshed_v2.1.hap1.chr12	12379558	12385915	+	TIR-NBS-LRR	.	1341	LRR_4	PF12799.8	43	0.91	88.3721	799	838
VITMroTrayshed_v2.0.hap1.chr12.ver2.0.g155340.t01	VITMroTrayshed_v2.1.hap1.chr12	12379558	12385915	+	TIR-NBS-LRR	.	1341	LRR_8	PF13855.7	61	0.00017	62.2951	843	879
VITMroTrayshed_v2.0.hap1.chr12.ver2.0.g155340.t01	VITMroTrayshed_v2.1.hap1.chr12	12379558	12385915	+	TIR-NBS-LRR	.	1341	LRR_4	PF12799.8	43	0.00012	88.3721	846	885
VITMroTrayshed_v2.0.hap1.chr12.ver2.0.g155340.t01	VITMroTrayshed_v2.1.hap1.chr12	12379558	12385915	+	TIR-NBS-LRR	.	1341	LRR_8	PF13855.7	61	0.0051	62.2951	890	926
VITMroTrayshed_v2.0.hap1.chr12.ver2.0.g155340.t01	VITMroTrayshed_v2.1.hap1.chr12	12379558	12385915	+	TIR-NBS-LRR	.	1341	LRR_4	PF12799.8	43	0.00086	88.3721	893	932
VITMroTrayshed_v2.0.hap1.chr12.ver2.0.g155340.t01	VITMroTrayshed_v2.1.hap1.chr12	12379558	12385915	+	TIR-NBS-LRR	.	1341	LRR_8	PF13855.7	61	0.0013	62.2951	937	973
VITMroTrayshed_v2.0.hap1.chr12.ver2.0.g155340.t01	VITMroTrayshed_v2.1.hap1.chr12	12379558	12385915	+	TIR-NBS-LRR	.	1341	LRR_4	PF12799.8	43	0.025	88.3721	940	979
VITMroTrayshed_v2.0.hap1.chr12.ver2.0.g155340.t01	VITMroTrayshed_v2.1.hap1.chr12	12379558	12385915	+	TIR-NBS-LRR	.	1341	LRR_8	PF13855.7	61	0.0002	62.2951	984	1020
VITMroTrayshed_v2.0.hap1.chr12.ver2.0.g155340.t01	VITMroTrayshed_v2.1.hap1.chr12	12379558	12385915	+	TIR-NBS-LRR	.	1341	LRR_4	PF12799.8	43	0.00028	88.3721	987	1026
VITMroTrayshed_v2.0.hap1.chr12.ver2.0.g155340.t01	VITMroTrayshed_v2.1.hap1.chr12	12379558	12385915	+	TIR-NBS-LRR	.	1341	LRR_8	PF13855.7	61	0.00031	62.2951	1031	1067
VITMroTrayshed_v2.0.hap1.chr12.ver2.0.g155340.t01	VITMroTrayshed_v2.1.hap1.chr12	12379558	12385915	+	TIR-NBS-LRR	.	1341	LRR_4	PF12799.8	43	0.00048	88.3721	1034	1070
VITMroTrayshed_v2.0.hap1.chr12.ver2.0.g155440.t01	VITMroTrayshed_v2.1.hap1.chr12	12618713	12625162	+	TIR-NBS-LRR	.	1694	TIR	PF01582.21	176	4.6e-47	91.4773	24	186
VITMroTrayshed_v2.0.hap1.chr12.ver2.0.g155440.t01	VITMroTrayshed_v2.1.hap1.chr12	12618713	12625162	+	TIR-NBS-LRR	.	1694	TIR_2	PF13676.7	121	3.2e-14	80.9917	26	121
VITMroTrayshed_v2.0.hap1.chr12.ver2.0.g155440.t01	VITMroTrayshed_v2.1.hap1.chr12	12618713	12625162	+	TIR-NBS-LRR	.	1694	NB-ARC	PF00931.23	252	5e-33	94.0476	201	434
VITMroTrayshed_v2.0.hap1.chr12.ver2.0.g155440.t01	VITMroTrayshed_v2.1.hap1.chr12	12618713	12625162	+	TIR-NBS-LRR	.	1694	LRR_3	PF07725.13	20	0.0015	100	644	663
VITMroTrayshed_v2.0.hap1.chr12.ver2.0.g155440.t01	VITMroTrayshed_v2.1.hap1.chr12	12618713	12625162	+	TIR-NBS-LRR	.	1694	LRR_8	PF13855.7	61	0.00025	95.082	644	699
VITMroTrayshed_v2.0.hap1.chr12.ver2.0.g155440.t01	VITMroTrayshed_v2.1.hap1.chr12	12618713	12625162	+	TIR-NBS-LRR	.	1694	LRR_8	PF13855.7	61	0.21	96.7213	689	747
VITMroTrayshed_v2.0.hap1.chr12.ver2.0.g155440.t01	VITMroTrayshed_v2.1.hap1.chr12	12618713	12625162	+	TIR-NBS-LRR	.	1694	LRR_4	PF12799.8	43	0.12	86.0465	765	802
VITMroTrayshed_v2.0.hap1.chr12.ver2.0.g155440.t01	VITMroTrayshed_v2.1.hap1.chr12	12618713	12625162	+	TIR-NBS-LRR	.	1694	LRR_4	PF12799.8	43	0.77	86.0465	811	849
VITMroTrayshed_v2.0.hap1.chr12.ver2.0.g155440.t01	VITMroTrayshed_v2.1.hap1.chr12	12618713	12625162	+	TIR-NBS-LRR	.	1694	LRR_8	PF13855.7	61	0.00021	62.2951	854	890
VITMroTrayshed_v2.0.hap1.chr12.ver2.0.g155440.t01	VITMroTrayshed_v2.1.hap1.chr12	12618713	12625162	+	TIR-NBS-LRR	.	1694	LRR_4	PF12799.8	43	5.9e-05	88.3721	857	896
VITMroTrayshed_v2.0.hap1.chr12.ver2.0.g155440.t01	VITMroTrayshed_v2.1.hap1.chr12	12618713	12625162	+	TIR-NBS-LRR	.	1694	LRR_8	PF13855.7	61	0.0027	81.9672	890	938
VITMroTrayshed_v2.0.hap1.chr12.ver2.0.g155440.t01	VITMroTrayshed_v2.1.hap1.chr12	12618713	12625162	+	TIR-NBS-LRR	.	1694	LRR_4	PF12799.8	43	0.02	79.0698	905	940
VITMroTrayshed_v2.0.hap1.chr12.ver2.0.g155440.t01	VITMroTrayshed_v2.1.hap1.chr12	12618713	12625162	+	TIR-NBS-LRR	.	1694	LRR_8	PF13855.7	61	0.00018	62.2951	949	985
VITMroTrayshed_v2.0.hap1.chr12.ver2.0.g155440.t01	VITMroTrayshed_v2.1.hap1.chr12	12618713	12625162	+	TIR-NBS-LRR	.	1694	LRR_4	PF12799.8	43	9.8e-05	88.3721	952	991
VITMroTrayshed_v2.0.hap1.chr12.ver2.0.g155440.t01	VITMroTrayshed_v2.1.hap1.chr12	12618713	12625162	+	TIR-NBS-LRR	.	1694	LRR_8	PF13855.7	61	0.038	60.6557	997	1032
VITMroTrayshed_v2.0.hap1.chr12.ver2.0.g155440.t01	VITMroTrayshed_v2.1.hap1.chr12	12618713	12625162	+	TIR-NBS-LRR	.	1694	LRR_4	PF12799.8	43	0.0042	79.0698	1003	1038
VITMroTrayshed_v2.0.hap1.chr12.ver2.0.g155440.t01	VITMroTrayshed_v2.1.hap1.chr12	12618713	12625162	+	TIR-NBS-LRR	.	1694	LRR_8	PF13855.7	61	0.47	60.6557	1044	1079
VITMroTrayshed_v2.0.hap1.chr12.ver2.0.g155440.t01	VITMroTrayshed_v2.1.hap1.chr12	12618713	12625162	+	TIR-NBS-LRR	.	1694	LRR_4	PF12799.8	43	0.17	79.0698	1050	1085
VITMroTrayshed_v2.0.hap1.chr12.ver2.0.g155440.t01	VITMroTrayshed_v2.1.hap1.chr12	12618713	12625162	+	TIR-NBS-LRR	.	1694	LRR_8	PF13855.7	61	0.47	60.6557	1091	1126
VITMroTrayshed_v2.0.hap1.chr12.ver2.0.g155440.t01	VITMroTrayshed_v2.1.hap1.chr12	12618713	12625162	+	TIR-NBS-LRR	.	1694	LRR_4	PF12799.8	43	0.17	79.0698	1097	1132
VITMroTrayshed_v2.0.hap1.chr12.ver2.0.g155440.t01	VITMroTrayshed_v2.1.hap1.chr12	12618713	12625162	+	TIR-NBS-LRR	.	1694	LRR_8	PF13855.7	61	5.4e-05	62.2951	1137	1173
VITMroTrayshed_v2.0.hap1.chr12.ver2.0.g155440.t01	VITMroTrayshed_v2.1.hap1.chr12	12618713	12625162	+	TIR-NBS-LRR	.	1694	LRR_4	PF12799.8	43	6.2e-05	88.3721	1140	1179
VITMroTrayshed_v2.0.hap1.chr12.ver2.0.g155440.t01	VITMroTrayshed_v2.1.hap1.chr12	12618713	12625162	+	TIR-NBS-LRR	.	1694	LRR_8	PF13855.7	61	0.0024	62.2951	1184	1220
VITMroTrayshed_v2.0.hap1.chr12.ver2.0.g155440.t01	VITMroTrayshed_v2.1.hap1.chr12	12618713	12625162	+	TIR-NBS-LRR	.	1694	LRR_4	PF12799.8	43	0.0017	88.3721	1187	1226
VITMroTrayshed_v2.0.hap1.chr12.ver2.0.g155440.t01	VITMroTrayshed_v2.1.hap1.chr12	12618713	12625162	+	TIR-NBS-LRR	.	1694	LRR_8	PF13855.7	61	0.00058	62.2951	1231	1267
VITMroTrayshed_v2.0.hap1.chr12.ver2.0.g155440.t01	VITMroTrayshed_v2.1.hap1.chr12	12618713	12625162	+	TIR-NBS-LRR	.	1694	LRR_4	PF12799.8	43	0.0019	86.0465	1235	1273
VITMroTrayshed_v2.0.hap1.chr12.ver2.0.g155440.t01	VITMroTrayshed_v2.1.hap1.chr12	12618713	12625162	+	TIR-NBS-LRR	.	1694	LRR_8	PF13855.7	61	0.00018	62.2951	1278	1314
VITMroTrayshed_v2.0.hap1.chr12.ver2.0.g155440.t01	VITMroTrayshed_v2.1.hap1.chr12	12618713	12625162	+	TIR-NBS-LRR	.	1694	LRR_4	PF12799.8	43	0.001	86.0465	1282	1320
VITMroTrayshed_v2.0.hap1.chr12.ver2.0.g155440.t01	VITMroTrayshed_v2.1.hap1.chr12	12618713	12625162	+	TIR-NBS-LRR	.	1694	LRR_8	PF13855.7	61	0.00093	60.6557	1326	1361
VITMroTrayshed_v2.0.hap1.chr12.ver2.0.g155440.t01	VITMroTrayshed_v2.1.hap1.chr12	12618713	12625162	+	TIR-NBS-LRR	.	1694	LRR_4	PF12799.8	43	0.00015	88.3721	1328	1367
VITMroTrayshed_v2.0.hap1.chr12.ver2.0.g155440.t01	VITMroTrayshed_v2.1.hap1.chr12	12618713	12625162	+	TIR-NBS-LRR	.	1694	LRR_8	PF13855.7	61	0.0045	62.2951	1372	1408
VITMroTrayshed_v2.0.hap1.chr12.ver2.0.g155440.t01	VITMroTrayshed_v2.1.hap1.chr12	12618713	12625162	+	TIR-NBS-LRR	.	1694	LRR_4	PF12799.8	43	0.085	79.0698	1375	1410
VITMroTrayshed_v2.0.hap1.chr12.ver2.1.g155500.t01	VITMroTrayshed_v2.1.hap1.chr12	12727708	12733670	+	TIR-NBS-LRR	manual	1266	TIR	PF01582.21	176	5.8e-45	92.0455	24	187
VITMroTrayshed_v2.0.hap1.chr12.ver2.1.g155500.t01	VITMroTrayshed_v2.1.hap1.chr12	12727708	12733670	+	TIR-NBS-LRR	manual	1266	TIR_2	PF13676.7	121	1e-12	80.9917	26	121
VITMroTrayshed_v2.0.hap1.chr12.ver2.1.g155500.t01	VITMroTrayshed_v2.1.hap1.chr12	12727708	12733670	+	TIR-NBS-LRR	manual	1266	NB-ARC	PF00931.23	252	5.2e-35	90.4762	201	425
VITMroTrayshed_v2.0.hap1.chr12.ver2.1.g155500.t01	VITMroTrayshed_v2.1.hap1.chr12	12727708	12733670	+	TIR-NBS-LRR	manual	1266	LRR_8	PF13855.7	61	0.00023	95.082	634	689
VITMroTrayshed_v2.0.hap1.chr12.ver2.1.g155500.t01	VITMroTrayshed_v2.1.hap1.chr12	12727708	12733670	+	TIR-NBS-LRR	manual	1266	LRR_8	PF13855.7	61	0.052	68.8525	697	737
VITMroTrayshed_v2.0.hap1.chr12.ver2.1.g155500.t01	VITMroTrayshed_v2.1.hap1.chr12	12727708	12733670	+	TIR-NBS-LRR	manual	1266	LRR_4	PF12799.8	43	0.02	86.0465	703	742
VITMroTrayshed_v2.0.hap1.chr12.ver2.1.g155500.t01	VITMroTrayshed_v2.1.hap1.chr12	12727708	12733670	+	TIR-NBS-LRR	manual	1266	LRR_8	PF13855.7	61	0.00021	62.2951	748	784
VITMroTrayshed_v2.0.hap1.chr12.ver2.1.g155500.t01	VITMroTrayshed_v2.1.hap1.chr12	12727708	12733670	+	TIR-NBS-LRR	manual	1266	LRR_4	PF12799.8	43	0.00049	86.0465	751	789
VITMroTrayshed_v2.0.hap1.chr12.ver2.1.g155500.t01	VITMroTrayshed_v2.1.hap1.chr12	12727708	12733670	+	TIR-NBS-LRR	manual	1266	LRR_8	PF13855.7	61	0.0095	60.6557	796	831
VITMroTrayshed_v2.0.hap1.chr12.ver2.1.g155500.t01	VITMroTrayshed_v2.1.hap1.chr12	12727708	12733670	+	TIR-NBS-LRR	manual	1266	LRR_8	PF13855.7	61	0.00025	62.2951	842	878
VITMroTrayshed_v2.0.hap1.chr12.ver2.1.g155500.t01	VITMroTrayshed_v2.1.hap1.chr12	12727708	12733670	+	TIR-NBS-LRR	manual	1266	LRR_4	PF12799.8	43	0.008	88.3721	845	884
VITMroTrayshed_v2.0.hap1.chr12.ver2.1.g155500.t01	VITMroTrayshed_v2.1.hap1.chr12	12727708	12733670	+	TIR-NBS-LRR	manual	1266	LRR_8	PF13855.7	61	0.00029	62.2951	889	925
VITMroTrayshed_v2.0.hap1.chr12.ver2.1.g155500.t01	VITMroTrayshed_v2.1.hap1.chr12	12727708	12733670	+	TIR-NBS-LRR	manual	1266	LRR_4	PF12799.8	43	0.00054	88.3721	892	931
VITMroTrayshed_v2.0.hap1.chr12.ver2.1.g155500.t01	VITMroTrayshed_v2.1.hap1.chr12	12727708	12733670	+	TIR-NBS-LRR	manual	1266	LRR_8	PF13855.7	61	0.0021	62.2951	936	972
VITMroTrayshed_v2.0.hap1.chr12.ver2.1.g155500.t01	VITMroTrayshed_v2.1.hap1.chr12	12727708	12733670	+	TIR-NBS-LRR	manual	1266	LRR_4	PF12799.8	43	0.0091	88.3721	939	978
VITMroTrayshed_v2.0.hap1.chr12.ver2.1.g155500.t01	VITMroTrayshed_v2.1.hap1.chr12	12727708	12733670	+	TIR-NBS-LRR	manual	1266	LRR_8	PF13855.7	61	0.00021	62.2951	983	1019
VITMroTrayshed_v2.0.hap1.chr12.ver2.1.g155500.t01	VITMroTrayshed_v2.1.hap1.chr12	12727708	12733670	+	TIR-NBS-LRR	manual	1266	LRR_4	PF12799.8	43	0.0004	88.3721	986	1025
VITMroTrayshed_v2.0.hap1.chr12.ver2.1.g155500.t01	VITMroTrayshed_v2.1.hap1.chr12	12727708	12733670	+	TIR-NBS-LRR	manual	1266	LRR_8	PF13855.7	61	0.00057	60.6557	1031	1066
VITMroTrayshed_v2.0.hap1.chr12.ver2.1.g155500.t01	VITMroTrayshed_v2.1.hap1.chr12	12727708	12733670	+	TIR-NBS-LRR	manual	1266	LRR_4	PF12799.8	43	0.00013	88.3721	1033	1072
VITMroTrayshed_v2.0.hap1.chr12.ver2.1.g155500.t01	VITMroTrayshed_v2.1.hap1.chr12	12727708	12733670	+	TIR-NBS-LRR	manual	1266	LRR_8	PF13855.7	61	0.0089	55.7377	1078	1110
VITMroTrayshed_v2.0.hap1.chr12.ver2.1.g155500.t01	VITMroTrayshed_v2.1.hap1.chr12	12727708	12733670	+	TIR-NBS-LRR	manual	1266	LRR_4	PF12799.8	43	0.035	74.4186	1085	1118
VITMroTrayshed_v2.0.hap1.chr12.ver2.1.g155500.t01	VITMroTrayshed_v2.1.hap1.chr12	12727708	12733670	+	TIR-NBS-LRR	manual	1266	LRR_8	PF13855.7	61	0.00032	60.6557	1124	1159
VITMroTrayshed_v2.0.hap1.chr12.ver2.1.g155500.t01	VITMroTrayshed_v2.1.hap1.chr12	12727708	12733670	+	TIR-NBS-LRR	manual	1266	LRR_4	PF12799.8	43	0.017	79.0698	1131	1166
VITMroTrayshed_v2.0.hap1.chr12.ver2.1.g155500.t01	VITMroTrayshed_v2.1.hap1.chr12	12727708	12733670	+	TIR-NBS-LRR	manual	1266	LRR_8	PF13855.7	61	0.0022	86.8852	1155	1206
VITMroTrayshed_v2.0.hap1.chr12.ver2.1.g155500.t01	VITMroTrayshed_v2.1.hap1.chr12	12727708	12733670	+	TIR-NBS-LRR	manual	1266	LRR_4	PF12799.8	43	0.016	83.7209	1176	1213
VITMroTrayshed_v2.0.hap1.chr12.ver2.1.g155500.t01	VITMroTrayshed_v2.1.hap1.chr12	12727708	12733670	+	TIR-NBS-LRR	manual	1266	LRR_8	PF13855.7	61	0.00011	78.6885	1208	1254
VITMroTrayshed_v2.0.hap1.chr12.ver2.1.g155500.t01	VITMroTrayshed_v2.1.hap1.chr12	12727708	12733670	+	TIR-NBS-LRR	manual	1266	LRR_4	PF12799.8	43	0.0013	79.0698	1221	1256
VITMroTrayshed_v2.0.hap1.chr12.ver2.1.g155591.t01	VITMroTrayshed_v2.1.hap1.chr12	12898080	12899041	-	CC-NBS	manual	319	Coils		21			124	144
VITMroTrayshed_v2.0.hap1.chr12.ver2.1.g155591.t01	VITMroTrayshed_v2.1.hap1.chr12	12898080	12899041	-	CC-NBS	manual	319	NB-ARC	PF00931.23	252	7.8e-32	54.7619	178	319
VITMroTrayshed_v2.0.hap1.chr12.ver2.1.g155592.t01	VITMroTrayshed_v2.1.hap1.chr12	12906550	12910345	-	CC-NBS-LRR	manual	1264	Coils		21			20	40
VITMroTrayshed_v2.0.hap1.chr12.ver2.1.g155592.t01	VITMroTrayshed_v2.1.hap1.chr12	12906550	12910345	-	CC-NBS-LRR	manual	1264	NB-ARC	PF00931.23	252	2.6e-52	86.1111	149	365
VITMroTrayshed_v2.0.hap1.chr12.ver2.1.g155592.t01	VITMroTrayshed_v2.1.hap1.chr12	12906550	12910345	-	CC-NBS-LRR	manual	1264	LRR_4	PF12799.8	43	0.92	83.7209	567	603
VITMroTrayshed_v2.0.hap1.chr12.ver2.1.g155592.t01	VITMroTrayshed_v2.1.hap1.chr12	12906550	12910345	-	CC-NBS-LRR	manual	1264	LRR_8	PF13855.7	61	8.7e-07	95.082	567	623
VITMroTrayshed_v2.0.hap1.chr12.ver2.1.g155592.t01	VITMroTrayshed_v2.1.hap1.chr12	12906550	12910345	-	CC-NBS-LRR	manual	1264	LRR_4	PF12799.8	43	0.056	81.3953	588	624
VITMroTrayshed_v2.0.hap1.chr12.ver2.1.g155592.t01	VITMroTrayshed_v2.1.hap1.chr12	12906550	12910345	-	CC-NBS-LRR	manual	1264	LRR_4	PF12799.8	43	0.32	67.4419	774	803
VITMroTrayshed_v2.0.hap1.chr12.ver2.0.g155600.t01	VITMroTrayshed_v2.1.hap1.chr12	12925709	12929593	-	CC-NBS-LRR	.	1294	Coils		21			72	92
VITMroTrayshed_v2.0.hap1.chr12.ver2.0.g155600.t01	VITMroTrayshed_v2.1.hap1.chr12	12925709	12929593	-	CC-NBS-LRR	.	1294	NB-ARC	PF00931.23	252	2.9e-54	87.6984	174	394
VITMroTrayshed_v2.0.hap1.chr12.ver2.0.g155600.t01	VITMroTrayshed_v2.1.hap1.chr12	12925709	12929593	-	CC-NBS-LRR	.	1294	LRR_8	PF13855.7	61	2.3e-07	93.4426	596	650
VITMroTrayshed_v2.0.hap1.chr12.ver2.0.g155600.t01	VITMroTrayshed_v2.1.hap1.chr12	12925709	12929593	-	CC-NBS-LRR	.	1294	LRR_4	PF12799.8	43	0.053	83.7209	597	633
VITMroTrayshed_v2.0.hap1.chr12.ver2.0.g155600.t01	VITMroTrayshed_v2.1.hap1.chr12	12925709	12929593	-	CC-NBS-LRR	.	1294	LRR_4	PF12799.8	43	0.031	81.3953	618	654
VITMroTrayshed_v2.0.hap1.chr12.ver2.0.g155600.t01	VITMroTrayshed_v2.1.hap1.chr12	12925709	12929593	-	CC-NBS-LRR	.	1294	LRR_4	PF12799.8	43	0.25	67.4419	804	833
VITMroTrayshed_v2.0.hap1.chr12.ver2.1.g155611.t01	VITMroTrayshed_v2.1.hap1.chr12	12945732	12949595	-	CC-NBS-LRR	manual	1287	Coils		21			42	62
VITMroTrayshed_v2.0.hap1.chr12.ver2.1.g155611.t01	VITMroTrayshed_v2.1.hap1.chr12	12945732	12949595	-	CC-NBS-LRR	manual	1287	NB-ARC	PF00931.23	252	2.9e-51	85.7143	171	386
VITMroTrayshed_v2.0.hap1.chr12.ver2.1.g155611.t01	VITMroTrayshed_v2.1.hap1.chr12	12945732	12949595	-	CC-NBS-LRR	manual	1287	LRR_4	PF12799.8	43	0.42	86.0465	589	626
VITMroTrayshed_v2.0.hap1.chr12.ver2.1.g155611.t01	VITMroTrayshed_v2.1.hap1.chr12	12945732	12949595	-	CC-NBS-LRR	manual	1287	LRR_8	PF13855.7	61	4.5e-05	93.4426	589	643
VITMroTrayshed_v2.0.hap1.chr12.ver2.1.g155611.t01	VITMroTrayshed_v2.1.hap1.chr12	12945732	12949595	-	CC-NBS-LRR	manual	1287	LRR_4	PF12799.8	43	0.053	81.3953	610	646
VITMroTrayshed_v2.0.hap1.chr12.ver2.1.g155611.t01	VITMroTrayshed_v2.1.hap1.chr12	12945732	12949595	-	CC-NBS-LRR	manual	1287	LRR_8	PF13855.7	61	0.8	86.8852	634	685
VITMroTrayshed_v2.0.hap1.chr12.ver2.0.g155760.t01	VITMroTrayshed_v2.1.hap1.chr12	13214534	13221765	+	TIR-NBS-LRR	.	1285	TIR	PF01582.21	176	6e-46	94.3182	20	190
VITMroTrayshed_v2.0.hap1.chr12.ver2.0.g155760.t01	VITMroTrayshed_v2.1.hap1.chr12	13214534	13221765	+	TIR-NBS-LRR	.	1285	TIR_2	PF13676.7	121	1.6e-13	80.9917	23	118
VITMroTrayshed_v2.0.hap1.chr12.ver2.0.g155760.t01	VITMroTrayshed_v2.1.hap1.chr12	13214534	13221765	+	TIR-NBS-LRR	.	1285	NB-ARC	PF00931.23	252	6.1e-23	85.3175	213	421
VITMroTrayshed_v2.0.hap1.chr12.ver2.0.g155760.t01	VITMroTrayshed_v2.1.hap1.chr12	13214534	13221765	+	TIR-NBS-LRR	.	1285	LRR_3	PF07725.13	20	2e-06	100	628	647
VITMroTrayshed_v2.0.hap1.chr12.ver2.0.g155760.t01	VITMroTrayshed_v2.1.hap1.chr12	13214534	13221765	+	TIR-NBS-LRR	.	1285	LRR_4	PF12799.8	43	0.043	93.0233	697	738
VITMroTrayshed_v2.0.hap1.chr12.ver2.0.g155760.t01	VITMroTrayshed_v2.1.hap1.chr12	13214534	13221765	+	TIR-NBS-LRR	.	1285	LRR_8	PF13855.7	61	0.49	95.082	745	801
VITMroTrayshed_v2.0.hap1.chr12.ver2.0.g155760.t01	VITMroTrayshed_v2.1.hap1.chr12	13214534	13221765	+	TIR-NBS-LRR	.	1285	LRR_8	PF13855.7	61	0.28	95.082	792	848
VITMroTrayshed_v2.0.hap1.chr12.ver2.0.g155760.t01	VITMroTrayshed_v2.1.hap1.chr12	13214534	13221765	+	TIR-NBS-LRR	.	1285	LRR_8	PF13855.7	61	0.013	95.082	816	872
VITMroTrayshed_v2.0.hap1.chr12.ver2.0.g155760.t01	VITMroTrayshed_v2.1.hap1.chr12	13214534	13221765	+	TIR-NBS-LRR	.	1285	LRR_4	PF12799.8	43	0.42	81.3953	842	879
VITMroTrayshed_v2.0.hap1.chr12.ver2.0.g155760.t01	VITMroTrayshed_v2.1.hap1.chr12	13214534	13221765	+	TIR-NBS-LRR	.	1285	LRR_4	PF12799.8	43	0.013	93.0233	951	993
VITMroTrayshed_v2.0.hap1.chr12.ver2.0.g155760.t01	VITMroTrayshed_v2.1.hap1.chr12	13214534	13221765	+	TIR-NBS-LRR	.	1285	LRR_8	PF13855.7	61	0.0012	95.082	951	1007
VITMroTrayshed_v2.0.hap1.chr12.ver2.0.g155760.t01	VITMroTrayshed_v2.1.hap1.chr12	13214534	13221765	+	TIR-NBS-LRR	.	1285	LRR_4	PF12799.8	43	0.18	93.0233	976	1016
VITMroTrayshed_v2.0.hap1.chr12.ver2.0.g155760.t02	VITMroTrayshed_v2.1.hap1.chr12	13214534	13221805	+	TIR-NBS-LRR	.	1284	TIR	PF01582.21	176	6e-46	94.3182	20	190
VITMroTrayshed_v2.0.hap1.chr12.ver2.0.g155760.t02	VITMroTrayshed_v2.1.hap1.chr12	13214534	13221805	+	TIR-NBS-LRR	.	1284	TIR_2	PF13676.7	121	1.6e-13	80.9917	23	118
VITMroTrayshed_v2.0.hap1.chr12.ver2.0.g155760.t02	VITMroTrayshed_v2.1.hap1.chr12	13214534	13221805	+	TIR-NBS-LRR	.	1284	NB-ARC	PF00931.23	252	6.1e-23	85.3175	213	421
VITMroTrayshed_v2.0.hap1.chr12.ver2.0.g155760.t02	VITMroTrayshed_v2.1.hap1.chr12	13214534	13221805	+	TIR-NBS-LRR	.	1284	LRR_3	PF07725.13	20	2e-06	100	628	647
VITMroTrayshed_v2.0.hap1.chr12.ver2.0.g155760.t02	VITMroTrayshed_v2.1.hap1.chr12	13214534	13221805	+	TIR-NBS-LRR	.	1284	LRR_4	PF12799.8	43	0.043	93.0233	697	738
VITMroTrayshed_v2.0.hap1.chr12.ver2.0.g155760.t02	VITMroTrayshed_v2.1.hap1.chr12	13214534	13221805	+	TIR-NBS-LRR	.	1284	LRR_8	PF13855.7	61	0.49	95.082	745	801
VITMroTrayshed_v2.0.hap1.chr12.ver2.0.g155760.t02	VITMroTrayshed_v2.1.hap1.chr12	13214534	13221805	+	TIR-NBS-LRR	.	1284	LRR_8	PF13855.7	61	0.28	95.082	792	848
VITMroTrayshed_v2.0.hap1.chr12.ver2.0.g155760.t02	VITMroTrayshed_v2.1.hap1.chr12	13214534	13221805	+	TIR-NBS-LRR	.	1284	LRR_8	PF13855.7	61	0.013	95.082	816	872
VITMroTrayshed_v2.0.hap1.chr12.ver2.0.g155760.t02	VITMroTrayshed_v2.1.hap1.chr12	13214534	13221805	+	TIR-NBS-LRR	.	1284	LRR_4	PF12799.8	43	0.42	81.3953	842	879
VITMroTrayshed_v2.0.hap1.chr12.ver2.0.g155760.t02	VITMroTrayshed_v2.1.hap1.chr12	13214534	13221805	+	TIR-NBS-LRR	.	1284	LRR_4	PF12799.8	43	0.013	93.0233	951	993
VITMroTrayshed_v2.0.hap1.chr12.ver2.0.g155760.t02	VITMroTrayshed_v2.1.hap1.chr12	13214534	13221805	+	TIR-NBS-LRR	.	1284	LRR_8	PF13855.7	61	0.0012	95.082	951	1007
VITMroTrayshed_v2.0.hap1.chr12.ver2.0.g155760.t02	VITMroTrayshed_v2.1.hap1.chr12	13214534	13221805	+	TIR-NBS-LRR	.	1284	LRR_4	PF12799.8	43	0.18	93.0233	976	1016
VITMroTrayshed_v2.0.hap1.chr12.ver2.0.g155760.t03	VITMroTrayshed_v2.1.hap1.chr12	13215928	13221765	+	NBS-LRR	.	1094	NB-ARC	PF00931.23	252	4.8e-23	85.3175	22	230
VITMroTrayshed_v2.0.hap1.chr12.ver2.0.g155760.t03	VITMroTrayshed_v2.1.hap1.chr12	13215928	13221765	+	NBS-LRR	.	1094	LRR_3	PF07725.13	20	1.7e-06	100	437	456
VITMroTrayshed_v2.0.hap1.chr12.ver2.0.g155760.t03	VITMroTrayshed_v2.1.hap1.chr12	13215928	13221765	+	NBS-LRR	.	1094	LRR_4	PF12799.8	43	0.036	93.0233	506	547
VITMroTrayshed_v2.0.hap1.chr12.ver2.0.g155760.t03	VITMroTrayshed_v2.1.hap1.chr12	13215928	13221765	+	NBS-LRR	.	1094	LRR_8	PF13855.7	61	0.39	95.082	554	610
VITMroTrayshed_v2.0.hap1.chr12.ver2.0.g155760.t03	VITMroTrayshed_v2.1.hap1.chr12	13215928	13221765	+	NBS-LRR	.	1094	LRR_4	PF12799.8	43	0.74	81.3953	582	619
VITMroTrayshed_v2.0.hap1.chr12.ver2.0.g155760.t03	VITMroTrayshed_v2.1.hap1.chr12	13215928	13221765	+	NBS-LRR	.	1094	LRR_4	PF12799.8	43	0.42	88.3721	600	639
VITMroTrayshed_v2.0.hap1.chr12.ver2.0.g155760.t03	VITMroTrayshed_v2.1.hap1.chr12	13215928	13221765	+	NBS-LRR	.	1094	LRR_8	PF13855.7	61	0.23	95.082	601	657
VITMroTrayshed_v2.0.hap1.chr12.ver2.0.g155760.t03	VITMroTrayshed_v2.1.hap1.chr12	13215928	13221765	+	NBS-LRR	.	1094	LRR_8	PF13855.7	61	0.011	95.082	625	681
VITMroTrayshed_v2.0.hap1.chr12.ver2.0.g155760.t03	VITMroTrayshed_v2.1.hap1.chr12	13215928	13221765	+	NBS-LRR	.	1094	LRR_4	PF12799.8	43	0.35	81.3953	651	688
VITMroTrayshed_v2.0.hap1.chr12.ver2.0.g155760.t03	VITMroTrayshed_v2.1.hap1.chr12	13215928	13221765	+	NBS-LRR	.	1094	LRR_4	PF12799.8	43	0.018	93.0233	760	802
VITMroTrayshed_v2.0.hap1.chr12.ver2.0.g155760.t03	VITMroTrayshed_v2.1.hap1.chr12	13215928	13221765	+	NBS-LRR	.	1094	LRR_8	PF13855.7	61	0.00097	95.082	760	816
VITMroTrayshed_v2.0.hap1.chr12.ver2.0.g155760.t03	VITMroTrayshed_v2.1.hap1.chr12	13215928	13221765	+	NBS-LRR	.	1094	LRR_4	PF12799.8	43	0.15	93.0233	785	825
VITMroTrayshed_v2.0.hap1.chr12.ver2.1.g155800.t01	VITMroTrayshed_v2.1.hap1.chr12	13265548	13271566	+	TIR-NBS-LRR	manual	1293	TIR	PF01582.21	176	1e-45	97.7273	21	195
VITMroTrayshed_v2.0.hap1.chr12.ver2.1.g155800.t01	VITMroTrayshed_v2.1.hap1.chr12	13265548	13271566	+	TIR-NBS-LRR	manual	1293	TIR_2	PF13676.7	121	2.9e-14	80.9917	23	118
VITMroTrayshed_v2.0.hap1.chr12.ver2.1.g155800.t01	VITMroTrayshed_v2.1.hap1.chr12	13265548	13271566	+	TIR-NBS-LRR	manual	1293	NB-ARC	PF00931.23	252	1.2e-26	85.7143	213	422
VITMroTrayshed_v2.0.hap1.chr12.ver2.1.g155800.t01	VITMroTrayshed_v2.1.hap1.chr12	13265548	13271566	+	TIR-NBS-LRR	manual	1293	LRR_3	PF07725.13	20	4.2e-07	100	631	650
VITMroTrayshed_v2.0.hap1.chr12.ver2.1.g155800.t01	VITMroTrayshed_v2.1.hap1.chr12	13265548	13271566	+	TIR-NBS-LRR	manual	1293	LRR_8	PF13855.7	61	0.079	96.7213	676	733
VITMroTrayshed_v2.0.hap1.chr12.ver2.1.g155800.t01	VITMroTrayshed_v2.1.hap1.chr12	13265548	13271566	+	TIR-NBS-LRR	manual	1293	LRR_4	PF12799.8	43	0.029	93.0233	700	741
VITMroTrayshed_v2.0.hap1.chr12.ver2.1.g155800.t01	VITMroTrayshed_v2.1.hap1.chr12	13265548	13271566	+	TIR-NBS-LRR	manual	1293	LRR_8	PF13855.7	61	0.27	95.082	748	804
VITMroTrayshed_v2.0.hap1.chr12.ver2.1.g155800.t01	VITMroTrayshed_v2.1.hap1.chr12	13265548	13271566	+	TIR-NBS-LRR	manual	1293	LRR_4	PF12799.8	43	0.62	88.3721	794	833
VITMroTrayshed_v2.0.hap1.chr12.ver2.1.g155800.t01	VITMroTrayshed_v2.1.hap1.chr12	13265548	13271566	+	TIR-NBS-LRR	manual	1293	LRR_8	PF13855.7	61	0.4	95.082	795	851
VITMroTrayshed_v2.0.hap1.chr12.ver2.1.g155800.t01	VITMroTrayshed_v2.1.hap1.chr12	13265548	13271566	+	TIR-NBS-LRR	manual	1293	LRR_8	PF13855.7	61	0.018	95.082	819	875
VITMroTrayshed_v2.0.hap1.chr12.ver2.1.g155800.t01	VITMroTrayshed_v2.1.hap1.chr12	13265548	13271566	+	TIR-NBS-LRR	manual	1293	LRR_4	PF12799.8	43	0.29	81.3953	845	882
VITMroTrayshed_v2.0.hap1.chr12.ver2.1.g155800.t01	VITMroTrayshed_v2.1.hap1.chr12	13265548	13271566	+	TIR-NBS-LRR	manual	1293	LRR_8	PF13855.7	61	0.005	90.1639	934	989
VITMroTrayshed_v2.0.hap1.chr12.ver2.1.g155800.t01	VITMroTrayshed_v2.1.hap1.chr12	13265548	13271566	+	TIR-NBS-LRR	manual	1293	LRR_4	PF12799.8	43	0.0095	86.0465	954	993
VITMroTrayshed_v2.0.hap1.chr12.ver2.1.g155800.t01	VITMroTrayshed_v2.1.hap1.chr12	13265548	13271566	+	TIR-NBS-LRR	manual	1293	LRR_8	PF13855.7	61	0.00097	93.4426	955	1010
VITMroTrayshed_v2.0.hap1.chr12.ver2.1.g155800.t01	VITMroTrayshed_v2.1.hap1.chr12	13265548	13271566	+	TIR-NBS-LRR	manual	1293	LRR_4	PF12799.8	43	0.053	95.3488	979	1020
VITMroTrayshed_v2.0.hap1.chr12.ver2.1.g155871.t01	VITMroTrayshed_v2.1.hap1.chr12	13414917	13416134	+	RPW8-NBS	manual	405	RPW8	PF05659.12	139	0.15	58.2734	5	90
VITMroTrayshed_v2.0.hap1.chr12.ver2.1.g155871.t01	VITMroTrayshed_v2.1.hap1.chr12	13414917	13416134	+	RPW8-NBS	manual	405	NB-ARC	PF00931.23	252	5.9e-53	86.9048	175	395
VITMroTrayshed_v2.0.hap1.chr12.ver2.0.g155890.t01	VITMroTrayshed_v2.1.hap1.chr12	13423452	13427276	+	CC-NBS-LRR	EVM	1274	Coils		21			42	62
VITMroTrayshed_v2.0.hap1.chr12.ver2.0.g155890.t01	VITMroTrayshed_v2.1.hap1.chr12	13423452	13427276	+	CC-NBS-LRR	EVM	1274	Coils		21			73	93
VITMroTrayshed_v2.0.hap1.chr12.ver2.0.g155890.t01	VITMroTrayshed_v2.1.hap1.chr12	13423452	13427276	+	CC-NBS-LRR	EVM	1274	NB-ARC	PF00931.23	252	1.3e-52	87.3016	167	387
VITMroTrayshed_v2.0.hap1.chr12.ver2.0.g155890.t01	VITMroTrayshed_v2.1.hap1.chr12	13423452	13427276	+	CC-NBS-LRR	EVM	1274	LRR_8	PF13855.7	61	7.6e-05	95.082	587	642
VITMroTrayshed_v2.0.hap1.chr12.ver2.0.g155890.t01	VITMroTrayshed_v2.1.hap1.chr12	13423452	13427276	+	CC-NBS-LRR	EVM	1274	LRR_4	PF12799.8	43	0.1	86.0465	588	625
VITMroTrayshed_v2.0.hap1.chr12.ver2.0.g155890.t01	VITMroTrayshed_v2.1.hap1.chr12	13423452	13427276	+	CC-NBS-LRR	EVM	1274	LRR_8	PF13855.7	61	0.79	86.8852	633	684
VITMroTrayshed_v2.0.hap1.chr12.ver2.0.g155900.t01	VITMroTrayshed_v2.1.hap1.chr12	13438054	13441761	+	CC-NBS-LRR	EVM	1235	Coils		21			42	62
VITMroTrayshed_v2.0.hap1.chr12.ver2.0.g155900.t01	VITMroTrayshed_v2.1.hap1.chr12	13438054	13441761	+	CC-NBS-LRR	EVM	1235	NB-ARC	PF00931.23	252	2.9e-52	87.6984	166	389
VITMroTrayshed_v2.0.hap1.chr12.ver2.0.g155900.t01	VITMroTrayshed_v2.1.hap1.chr12	13438054	13441761	+	CC-NBS-LRR	EVM	1235	LRR_4	PF12799.8	43	0.38	86.0465	589	626
VITMroTrayshed_v2.0.hap1.chr12.ver2.0.g155900.t01	VITMroTrayshed_v2.1.hap1.chr12	13438054	13441761	+	CC-NBS-LRR	EVM	1235	LRR_8	PF13855.7	61	0.0017	91.8033	589	642
VITMroTrayshed_v2.0.hap1.chr12.ver2.0.g155900.t01	VITMroTrayshed_v2.1.hap1.chr12	13438054	13441761	+	CC-NBS-LRR	EVM	1235	LRR_4	PF12799.8	43	0.38	65.1163	794	822
VITMroTrayshed_v2.0.hap1.chr12.ver2.0.g155910.t01	VITMroTrayshed_v2.1.hap1.chr12	13487050	13490807	+	CC-NBS-LRR	.	1149	Coils		21			20	40
VITMroTrayshed_v2.0.hap1.chr12.ver2.0.g155910.t01	VITMroTrayshed_v2.1.hap1.chr12	13487050	13490807	+	CC-NBS-LRR	.	1149	Coils		21			100	120
VITMroTrayshed_v2.0.hap1.chr12.ver2.0.g155910.t01	VITMroTrayshed_v2.1.hap1.chr12	13487050	13490807	+	CC-NBS-LRR	.	1149	NB-ARC	PF00931.23	252	5.7e-51	86.9048	154	374
VITMroTrayshed_v2.0.hap1.chr12.ver2.0.g155910.t01	VITMroTrayshed_v2.1.hap1.chr12	13487050	13490807	+	CC-NBS-LRR	.	1149	LRR_8	PF13855.7	61	0.57	67.2131	572	611
VITMroTrayshed_v2.0.hap1.chr12.ver2.0.g155910.t01	VITMroTrayshed_v2.1.hap1.chr12	13487050	13490807	+	CC-NBS-LRR	.	1149	LRR_4	PF12799.8	43	0.097	79.0698	761	796
VITMroTrayshed_v2.0.hap1.chr12.ver2.0.g155920.t01	VITMroTrayshed_v2.1.hap1.chr12	13493896	13497720	+	CC-NBS-LRR	.	1274	Coils		21			42	62
VITMroTrayshed_v2.0.hap1.chr12.ver2.0.g155920.t01	VITMroTrayshed_v2.1.hap1.chr12	13493896	13497720	+	CC-NBS-LRR	.	1274	Coils		21			73	93
VITMroTrayshed_v2.0.hap1.chr12.ver2.0.g155920.t01	VITMroTrayshed_v2.1.hap1.chr12	13493896	13497720	+	CC-NBS-LRR	.	1274	NB-ARC	PF00931.23	252	1e-52	87.3016	167	387
VITMroTrayshed_v2.0.hap1.chr12.ver2.0.g155920.t01	VITMroTrayshed_v2.1.hap1.chr12	13493896	13497720	+	CC-NBS-LRR	.	1274	LRR_8	PF13855.7	61	7.6e-05	95.082	587	642
VITMroTrayshed_v2.0.hap1.chr12.ver2.0.g155920.t01	VITMroTrayshed_v2.1.hap1.chr12	13493896	13497720	+	CC-NBS-LRR	.	1274	LRR_4	PF12799.8	43	0.088	86.0465	588	625
VITMroTrayshed_v2.0.hap1.chr12.ver2.0.g155920.t01	VITMroTrayshed_v2.1.hap1.chr12	13493896	13497720	+	CC-NBS-LRR	.	1274	LRR_8	PF13855.7	61	0.79	86.8852	633	684
VITMroTrayshed_v2.0.hap1.chr12.ver2.0.g155940.t01	VITMroTrayshed_v2.1.hap1.chr12	13527378	13530827	+	CC-NBS-LRR	EVM	1109	Coils		21			42	62
VITMroTrayshed_v2.0.hap1.chr12.ver2.0.g155940.t01	VITMroTrayshed_v2.1.hap1.chr12	13527378	13530827	+	CC-NBS-LRR	EVM	1109	Coils		21			73	93
VITMroTrayshed_v2.0.hap1.chr12.ver2.0.g155940.t01	VITMroTrayshed_v2.1.hap1.chr12	13527378	13530827	+	CC-NBS-LRR	EVM	1109	NB-ARC	PF00931.23	252	4.8e-41	85.7143	142	346
VITMroTrayshed_v2.0.hap1.chr12.ver2.0.g155940.t01	VITMroTrayshed_v2.1.hap1.chr12	13527378	13530827	+	CC-NBS-LRR	EVM	1109	LRR_8	PF13855.7	61	8.1e-05	93.4426	546	600
VITMroTrayshed_v2.0.hap1.chr12.ver2.0.g155940.t01	VITMroTrayshed_v2.1.hap1.chr12	13527378	13530827	+	CC-NBS-LRR	EVM	1109	LRR_4	PF12799.8	43	0.48	86.0465	547	584
VITMroTrayshed_v2.0.hap1.chr12.ver2.0.g155940.t01	VITMroTrayshed_v2.1.hap1.chr12	13527378	13530827	+	CC-NBS-LRR	EVM	1109	LRR_8	PF13855.7	61	0.4	86.8852	592	643
VITMroTrayshed_v2.0.hap1.chr12.ver2.1.g155941.t01	VITMroTrayshed_v2.1.hap1.chr12	13552258	13554627	+	NBS-LRR	manual	789	NB-ARC	PF00931.23	252	1.8e-46	77.381	1	197
VITMroTrayshed_v2.0.hap1.chr12.ver2.1.g155941.t01	VITMroTrayshed_v2.1.hap1.chr12	13552258	13554627	+	NBS-LRR	manual	789	LRR_8	PF13855.7	61	4.3e-05	90.1639	396	448
VITMroTrayshed_v2.0.hap1.chr12.ver2.1.g155941.t01	VITMroTrayshed_v2.1.hap1.chr12	13552258	13554627	+	NBS-LRR	manual	789	LRR_4	PF12799.8	43	0.035	86.0465	397	434
VITMroTrayshed_v2.0.hap1.chr12.ver2.1.g155941.t01	VITMroTrayshed_v2.1.hap1.chr12	13552258	13554627	+	NBS-LRR	manual	789	LRR_8	PF13855.7	61	0.096	86.8852	442	493
VITMroTrayshed_v2.0.hap1.chr12.ver2.1.g155941.t01	VITMroTrayshed_v2.1.hap1.chr12	13552258	13554627	+	NBS-LRR	manual	789	LRR_4	PF12799.8	43	0.22	65.1163	602	630
VITMroTrayshed_v2.0.hap1.chr12.ver2.1.g156131.t01	VITMroTrayshed_v2.1.hap1.chr12	13851287	13852744	+	RPW8-NBS	manual	485	RPW8	PF05659.12	139	0.068	58.2734	5	90
VITMroTrayshed_v2.0.hap1.chr12.ver2.1.g156131.t01	VITMroTrayshed_v2.1.hap1.chr12	13851287	13852744	+	RPW8-NBS	manual	485	NB-ARC	PF00931.23	252	1.4e-53	87.3016	176	395
VITMroTrayshed_v2.0.hap1.chr12.ver2.0.g156680.t01	VITMroTrayshed_v2.1.hap1.chr12	14511210	14515480	+	CC-NBS-LRR	.	1399	Coils		21			143	163
VITMroTrayshed_v2.0.hap1.chr12.ver2.0.g156680.t01	VITMroTrayshed_v2.1.hap1.chr12	14511210	14515480	+	CC-NBS-LRR	.	1399	NB-ARC	PF00931.23	252	1e-53	86.1111	200	417
VITMroTrayshed_v2.0.hap1.chr12.ver2.0.g156680.t01	VITMroTrayshed_v2.1.hap1.chr12	14511210	14515480	+	CC-NBS-LRR	.	1399	LRR_4	PF12799.8	43	0.24	83.7209	599	635
VITMroTrayshed_v2.0.hap1.chr12.ver2.0.g156680.t01	VITMroTrayshed_v2.1.hap1.chr12	14511210	14515480	+	CC-NBS-LRR	.	1399	LRR_8	PF13855.7	61	0.0047	67.2131	614	653
VITMroTrayshed_v2.0.hap1.chr12.ver2.0.g156680.t01	VITMroTrayshed_v2.1.hap1.chr12	14511210	14515480	+	CC-NBS-LRR	.	1399	LRR_8	PF13855.7	61	0.00027	95.082	1186	1245
VITMroTrayshed_v2.0.hap1.chr12.ver2.1.g156691.t01	VITMroTrayshed_v2.1.hap1.chr12	14523838	14527752	+	NBS-LRR	manual	1304	NB-ARC	PF00931.23	252	6.4e-48	81.746	198	400
VITMroTrayshed_v2.0.hap1.chr12.ver2.1.g156691.t01	VITMroTrayshed_v2.1.hap1.chr12	14523838	14527752	+	NBS-LRR	manual	1304	LRR_8	PF13855.7	61	0.047	63.9344	572	609
VITMroTrayshed_v2.0.hap1.chr12.ver2.1.g156691.t01	VITMroTrayshed_v2.1.hap1.chr12	14523838	14527752	+	NBS-LRR	manual	1304	LRR_4	PF12799.8	43	0.0083	86.0465	579	616
VITMroTrayshed_v2.0.hap1.chr12.ver2.1.g156691.t01	VITMroTrayshed_v2.1.hap1.chr12	14523838	14527752	+	NBS-LRR	manual	1304	LRR_8	PF13855.7	61	0.14	88.5246	625	677
VITMroTrayshed_v2.0.hap1.chr12.ver2.1.g156691.t01	VITMroTrayshed_v2.1.hap1.chr12	14523838	14527752	+	NBS-LRR	manual	1304	LRR_4	PF12799.8	43	0.1	76.7442	649	688
VITMroTrayshed_v2.0.hap1.chr12.ver2.1.g156691.t01	VITMroTrayshed_v2.1.hap1.chr12	14523838	14527752	+	NBS-LRR	manual	1304	LRR_4	PF12799.8	43	0.15	67.4419	782	811
VITMroTrayshed_v2.0.hap1.chr12.ver2.1.g156691.t01	VITMroTrayshed_v2.1.hap1.chr12	14523838	14527752	+	NBS-LRR	manual	1304	LRR_4	PF12799.8	43	0.12	81.3953	1001	1038
VITMroTrayshed_v2.0.hap1.chr12.ver2.1.g156691.t01	VITMroTrayshed_v2.1.hap1.chr12	14523838	14527752	+	NBS-LRR	manual	1304	LRR_8	PF13855.7	61	0.077	96.7213	1191	1251
VITMroTrayshed_v2.0.hap1.chr12.ver2.1.g156700.t01	VITMroTrayshed_v2.1.hap1.chr12	14538587	14542777	+	CC-NBS-LRR	manual	1396	Coils		21			41	61
VITMroTrayshed_v2.0.hap1.chr12.ver2.1.g156700.t01	VITMroTrayshed_v2.1.hap1.chr12	14538587	14542777	+	CC-NBS-LRR	manual	1396	NB-ARC	PF00931.23	252	3.1e-50	82.1429	189	391
VITMroTrayshed_v2.0.hap1.chr12.ver2.1.g156700.t01	VITMroTrayshed_v2.1.hap1.chr12	14538587	14542777	+	CC-NBS-LRR	manual	1396	LRR_8	PF13855.7	61	0.0074	65.5738	567	605
VITMroTrayshed_v2.0.hap1.chr12.ver2.1.g156700.t01	VITMroTrayshed_v2.1.hap1.chr12	14538587	14542777	+	CC-NBS-LRR	manual	1396	LRR_4	PF12799.8	43	0.00037	90.6977	572	608
VITMroTrayshed_v2.0.hap1.chr12.ver2.1.g156700.t01	VITMroTrayshed_v2.1.hap1.chr12	14538587	14542777	+	CC-NBS-LRR	manual	1396	LRR_8	PF13855.7	61	0.0001	93.4426	573	627
VITMroTrayshed_v2.0.hap1.chr12.ver2.1.g156700.t01	VITMroTrayshed_v2.1.hap1.chr12	14538587	14542777	+	CC-NBS-LRR	manual	1396	LRR_4	PF12799.8	43	0.26	67.4419	796	825
VITMroTrayshed_v2.0.hap1.chr12.ver2.1.g156700.t01	VITMroTrayshed_v2.1.hap1.chr12	14538587	14542777	+	CC-NBS-LRR	manual	1396	LRR_8	PF13855.7	61	0.12	95.082	1208	1267
VITMroTrayshed_v2.0.hap1.chr12.ver2.1.g156700.t01	VITMroTrayshed_v2.1.hap1.chr12	14538587	14542777	+	CC-NBS-LRR	manual	1396	LRR_8	PF13855.7	61	0.017	91.8033	1258	1315
VITMroTrayshed_v2.0.hap1.chr12.ver2.1.g156700.t01	VITMroTrayshed_v2.1.hap1.chr12	14538587	14542777	+	CC-NBS-LRR	manual	1396	LRR_8	PF13855.7	61	0.38	95.082	1283	1342
VITMroTrayshed_v2.0.hap1.chr12.ver2.0.g156820.t01	VITMroTrayshed_v2.1.hap1.chr12	14664094	14665896	-	NBS	EVM	600	NB-ARC	PF00931.23	252	1.2e-49	82.1429	198	400
VITMroTrayshed_v2.0.hap1.chr12.ver2.1.g156831.t01	VITMroTrayshed_v2.1.hap1.chr12	14689346	14690641	+	NBS	manual	399	NB-ARC	PF00931.23	252	6.6e-29	50.3968	226	353
VITMroTrayshed_v2.0.hap1.chr12.ver2.0.g156880.t01	VITMroTrayshed_v2.1.hap1.chr12	14717987	14719216	-	CC-NBS	EVM	409	Coils		21			49	69
VITMroTrayshed_v2.0.hap1.chr12.ver2.0.g156880.t01	VITMroTrayshed_v2.1.hap1.chr12	14717987	14719216	-	CC-NBS	EVM	409	NB-ARC	PF00931.23	252	1.5e-49	87.6984	187	406
VITMroTrayshed_v2.0.hap1.chr12.ver2.0.g156890.t01	VITMroTrayshed_v2.1.hap1.chr12	14727381	14731472	-	NBS-LRR	.	1363	NB-ARC	PF00931.23	252	2.9e-49	86.1111	181	402
VITMroTrayshed_v2.0.hap1.chr12.ver2.0.g156890.t01	VITMroTrayshed_v2.1.hap1.chr12	14727381	14731472	-	NBS-LRR	.	1363	LRR_8	PF13855.7	61	0.0004	95.082	585	640
VITMroTrayshed_v2.0.hap1.chr12.ver2.0.g156890.t01	VITMroTrayshed_v2.1.hap1.chr12	14727381	14731472	-	NBS-LRR	.	1363	LRR_4	PF12799.8	43	0.032	95.3488	607	646
VITMroTrayshed_v2.0.hap1.chr12.ver2.0.g156890.t01	VITMroTrayshed_v2.1.hap1.chr12	14727381	14731472	-	NBS-LRR	.	1363	LRR_4	PF12799.8	43	0.037	93.0233	630	675
VITMroTrayshed_v2.0.hap1.chr12.ver2.0.g156890.t01	VITMroTrayshed_v2.1.hap1.chr12	14727381	14731472	-	NBS-LRR	.	1363	LRR_8	PF13855.7	61	0.0099	86.8852	630	681
VITMroTrayshed_v2.0.hap1.chr12.ver2.0.g156890.t01	VITMroTrayshed_v2.1.hap1.chr12	14727381	14731472	-	NBS-LRR	.	1363	LRR_8	PF13855.7	61	0.17	96.7213	1225	1285
VITMroTrayshed_v2.0.hap1.chr12.ver2.0.g156890.t01	VITMroTrayshed_v2.1.hap1.chr12	14727381	14731472	-	NBS-LRR	.	1363	LRR_8	PF13855.7	61	0.95	86.8852	1250	1304
VITMroTrayshed_v2.0.hap1.chr12.ver2.0.g156890.t02	VITMroTrayshed_v2.1.hap1.chr12	14727381	14731472	-	NBS-LRR	.	1363	NB-ARC	PF00931.23	252	2.9e-49	86.1111	181	402
VITMroTrayshed_v2.0.hap1.chr12.ver2.0.g156890.t02	VITMroTrayshed_v2.1.hap1.chr12	14727381	14731472	-	NBS-LRR	.	1363	LRR_8	PF13855.7	61	0.0004	95.082	585	640
VITMroTrayshed_v2.0.hap1.chr12.ver2.0.g156890.t02	VITMroTrayshed_v2.1.hap1.chr12	14727381	14731472	-	NBS-LRR	.	1363	LRR_4	PF12799.8	43	0.032	95.3488	607	646
VITMroTrayshed_v2.0.hap1.chr12.ver2.0.g156890.t02	VITMroTrayshed_v2.1.hap1.chr12	14727381	14731472	-	NBS-LRR	.	1363	LRR_4	PF12799.8	43	0.037	93.0233	630	675
VITMroTrayshed_v2.0.hap1.chr12.ver2.0.g156890.t02	VITMroTrayshed_v2.1.hap1.chr12	14727381	14731472	-	NBS-LRR	.	1363	LRR_8	PF13855.7	61	0.0099	86.8852	630	681
VITMroTrayshed_v2.0.hap1.chr12.ver2.0.g156890.t02	VITMroTrayshed_v2.1.hap1.chr12	14727381	14731472	-	NBS-LRR	.	1363	LRR_8	PF13855.7	61	0.17	96.7213	1225	1285
VITMroTrayshed_v2.0.hap1.chr12.ver2.0.g156890.t02	VITMroTrayshed_v2.1.hap1.chr12	14727381	14731472	-	NBS-LRR	.	1363	LRR_8	PF13855.7	61	0.95	86.8852	1250	1304
VITMroTrayshed_v2.0.hap1.chr12.ver2.0.g156910.t01	VITMroTrayshed_v2.1.hap1.chr12	14751444	14755670	-	NBS-LRR	.	1408	NB-ARC	PF00931.23	252	2.5e-52	98.8095	183	418
VITMroTrayshed_v2.0.hap1.chr12.ver2.0.g156910.t01	VITMroTrayshed_v2.1.hap1.chr12	14751444	14755670	-	NBS-LRR	.	1408	LRR_4	PF12799.8	43	0.25	88.3721	578	616
VITMroTrayshed_v2.0.hap1.chr12.ver2.0.g156910.t01	VITMroTrayshed_v2.1.hap1.chr12	14751444	14755670	-	NBS-LRR	.	1408	LRR_8	PF13855.7	61	0.00032	93.4426	579	633
VITMroTrayshed_v2.0.hap1.chr12.ver2.0.g156910.t01	VITMroTrayshed_v2.1.hap1.chr12	14751444	14755670	-	NBS-LRR	.	1408	LRR_4	PF12799.8	43	0.0024	86.0465	780	818
VITMroTrayshed_v2.0.hap1.chr12.ver2.0.g156910.t01	VITMroTrayshed_v2.1.hap1.chr12	14751444	14755670	-	NBS-LRR	.	1408	LRR_8	PF13855.7	61	0.13	90.1639	1198	1254
VITMroTrayshed_v2.0.hap1.chr12.ver2.0.g156910.t01	VITMroTrayshed_v2.1.hap1.chr12	14751444	14755670	-	NBS-LRR	.	1408	LRR_8	PF13855.7	61	0.0012	95.082	1220	1279
VITMroTrayshed_v2.0.hap1.chr12.ver2.0.g156910.t01	VITMroTrayshed_v2.1.hap1.chr12	14751444	14755670	-	NBS-LRR	.	1408	LRR_5	PF13306.7	128	0.24	78.9062	1242	1352
VITMroTrayshed_v2.0.hap1.chr12.ver2.0.g156910.t01	VITMroTrayshed_v2.1.hap1.chr12	14751444	14755670	-	NBS-LRR	.	1408	LRR_4	PF12799.8	43	0.0057	88.3721	1244	1285
VITMroTrayshed_v2.0.hap1.chr12.ver2.0.g156910.t01	VITMroTrayshed_v2.1.hap1.chr12	14751444	14755670	-	NBS-LRR	.	1408	LRR_8	PF13855.7	61	0.00022	95.082	1245	1304
VITMroTrayshed_v2.0.hap1.chr12.ver2.0.g156910.t01	VITMroTrayshed_v2.1.hap1.chr12	14751444	14755670	-	NBS-LRR	.	1408	LRR_4	PF12799.8	43	0.012	93.0233	1294	1337
VITMroTrayshed_v2.0.hap1.chr12.ver2.0.g156910.t01	VITMroTrayshed_v2.1.hap1.chr12	14751444	14755670	-	NBS-LRR	.	1408	LRR_8	PF13855.7	61	0.00075	95.082	1295	1354
VITMroTrayshed_v2.0.hap2.chr12.ver2.1.g404040.t01	VITMroTrayshed_v2.1.hap1.chr12	14942146	14946402	+	CC-NBS-LRR	manual	1418	Coils		21			125	145
VITMroTrayshed_v2.0.hap2.chr12.ver2.1.g404040.t01	VITMroTrayshed_v2.1.hap1.chr12	14942146	14946402	+	CC-NBS-LRR	manual	1418	NB-ARC	PF00931.23	252	2.4e-48	87.6984	182	419
VITMroTrayshed_v2.0.hap2.chr12.ver2.1.g404040.t01	VITMroTrayshed_v2.1.hap1.chr12	14942146	14946402	+	CC-NBS-LRR	manual	1418	LRR_8	PF13855.7	61	0.0019	93.4426	616	670
VITMroTrayshed_v2.0.hap2.chr12.ver2.1.g404040.t01	VITMroTrayshed_v2.1.hap1.chr12	14942146	14946402	+	CC-NBS-LRR	manual	1418	LRR_4	PF12799.8	43	0.25	83.7209	617	653
VITMroTrayshed_v2.0.hap2.chr12.ver2.1.g404040.t01	VITMroTrayshed_v2.1.hap1.chr12	14942146	14946402	+	CC-NBS-LRR	manual	1418	LRR_8	PF13855.7	61	0.00027	91.8033	1254	1311
VITMroTrayshed_v2.0.hap2.chr12.ver2.1.g404080.t01	VITMroTrayshed_v2.1.hap1.chr12	14983562	14987836	+	CC-NBS-LRR	manual	1424	Coils		21			125	145
VITMroTrayshed_v2.0.hap2.chr12.ver2.1.g404080.t01	VITMroTrayshed_v2.1.hap1.chr12	14983562	14987836	+	CC-NBS-LRR	manual	1424	NB-ARC	PF00931.23	252	2.9e-47	85.7143	181	415
VITMroTrayshed_v2.0.hap2.chr12.ver2.1.g404080.t01	VITMroTrayshed_v2.1.hap1.chr12	14983562	14987836	+	CC-NBS-LRR	manual	1424	LRR_8	PF13855.7	61	0.00048	62.2951	621	657
VITMroTrayshed_v2.0.hap2.chr12.ver2.1.g404080.t01	VITMroTrayshed_v2.1.hap1.chr12	14983562	14987836	+	CC-NBS-LRR	manual	1424	LRR_8	PF13855.7	61	0.75	88.5246	1239	1294
VITMroTrayshed_v2.0.hap2.chr12.ver2.1.g404080.t01	VITMroTrayshed_v2.1.hap1.chr12	14983562	14987836	+	CC-NBS-LRR	manual	1424	LRR_8	PF13855.7	61	0.036	88.5246	1289	1344
VITMroTrayshed_v2.0.hap2.chr12.ver2.0.g404100.t01	VITMroTrayshed_v2.1.hap1.chr12	15024259	15028544	+	NBS-LRR	EVM	1363	NB-ARC	PF00931.23	252	5.2e-48	87.3016	180	413
VITMroTrayshed_v2.0.hap2.chr12.ver2.0.g404100.t01	VITMroTrayshed_v2.1.hap1.chr12	15024259	15028544	+	NBS-LRR	EVM	1363	LRR_8	PF13855.7	61	0.00014	93.4426	1176	1234
VITMroTrayshed_v2.0.hap2.chr12.ver2.0.g404100.t01	VITMroTrayshed_v2.1.hap1.chr12	15024259	15028544	+	NBS-LRR	EVM	1363	LRR_4	PF12799.8	43	0.31	90.6977	1249	1291
VITMroTrayshed_v2.0.hap2.chr12.ver2.0.g404100.t01	VITMroTrayshed_v2.1.hap1.chr12	15024259	15028544	+	NBS-LRR	EVM	1363	LRR_8	PF13855.7	61	0.00042	86.8852	1250	1304
VITMroTrayshed_v2.0.hap2.chr12.ver2.1.g404131.t01	VITMroTrayshed_v2.1.hap1.chr12	15091453	15095601	+	CC-NBS-LRR	manual	1382	Coils		21			126	146
VITMroTrayshed_v2.0.hap2.chr12.ver2.1.g404131.t01	VITMroTrayshed_v2.1.hap1.chr12	15091453	15095601	+	CC-NBS-LRR	manual	1382	NB-ARC	PF00931.23	252	6.3e-50	96.4286	180	416
VITMroTrayshed_v2.0.hap2.chr12.ver2.1.g404131.t01	VITMroTrayshed_v2.1.hap1.chr12	15091453	15095601	+	CC-NBS-LRR	manual	1382	LRR_8	PF13855.7	61	0.13	88.5246	583	634
VITMroTrayshed_v2.0.hap2.chr12.ver2.1.g404131.t01	VITMroTrayshed_v2.1.hap1.chr12	15091453	15095601	+	CC-NBS-LRR	manual	1382	LRR_4	PF12799.8	43	0.068	86.0465	584	621
VITMroTrayshed_v2.0.hap2.chr12.ver2.1.g404131.t01	VITMroTrayshed_v2.1.hap1.chr12	15091453	15095601	+	CC-NBS-LRR	manual	1382	LRR_8	PF13855.7	61	0.14	95.082	606	661
VITMroTrayshed_v2.0.hap2.chr12.ver2.1.g404131.t01	VITMroTrayshed_v2.1.hap1.chr12	15091453	15095601	+	CC-NBS-LRR	manual	1382	LRR_4	PF12799.8	43	0.55	72.093	783	814
VITMroTrayshed_v2.0.hap2.chr12.ver2.1.g404131.t01	VITMroTrayshed_v2.1.hap1.chr12	15091453	15095601	+	CC-NBS-LRR	manual	1382	LRR_8	PF13855.7	61	5.8e-05	96.7213	1218	1278
VITMroTrayshed_v2.0.hap2.chr12.ver2.0.g404150.t01	VITMroTrayshed_v2.1.hap1.chr12	15113024	15114316	+	NBS	EVM	375	NB-ARC	PF00931.23	252	1.1e-29	51.5873	198	329
VITMroTrayshed_v2.0.hap1.chr12.ver2.0.g157300.t01	VITMroTrayshed_v2.1.hap1.chr12	15368330	15372571	-	NBS-LRR	EVM	1413	NB-ARC	PF00931.23	252	7.4e-48	86.5079	183	404
VITMroTrayshed_v2.0.hap1.chr12.ver2.0.g157300.t01	VITMroTrayshed_v2.1.hap1.chr12	15368330	15372571	-	NBS-LRR	EVM	1413	LRR_8	PF13855.7	61	7.1e-05	93.4426	588	642
VITMroTrayshed_v2.0.hap1.chr12.ver2.0.g157300.t01	VITMroTrayshed_v2.1.hap1.chr12	15368330	15372571	-	NBS-LRR	EVM	1413	LRR_4	PF12799.8	43	0.056	93.0233	612	650
VITMroTrayshed_v2.0.hap1.chr12.ver2.0.g157300.t01	VITMroTrayshed_v2.1.hap1.chr12	15368330	15372571	-	NBS-LRR	EVM	1413	LRR_8	PF13855.7	61	1.4e-06	90.1639	1228	1284
VITMroTrayshed_v2.0.hap1.chr12.ver2.0.g157310.t01	VITMroTrayshed_v2.1.hap1.chr12	15397978	15407209	-	NBS-LRR	EVM	1665	NB-ARC	PF00931.23	252	3.2e-47	86.5079	183	404
VITMroTrayshed_v2.0.hap1.chr12.ver2.0.g157310.t01	VITMroTrayshed_v2.1.hap1.chr12	15397978	15407209	-	NBS-LRR	EVM	1665	LRR_8	PF13855.7	61	0.0041	93.4426	588	642
VITMroTrayshed_v2.0.hap1.chr12.ver2.0.g157310.t01	VITMroTrayshed_v2.1.hap1.chr12	15397978	15407209	-	NBS-LRR	EVM	1665	LRR_8	PF13855.7	61	0.0009	88.5246	1227	1282
VITMroTrayshed_v2.0.hap1.chr12.ver2.0.g157320.t01	VITMroTrayshed_v2.1.hap1.chr12	15428801	15433972	-	NBS-LRR	EVM	1452	NB-ARC	PF00931.23	252	2.5e-50	86.1111	184	404
VITMroTrayshed_v2.0.hap1.chr12.ver2.0.g157320.t01	VITMroTrayshed_v2.1.hap1.chr12	15428801	15433972	-	NBS-LRR	EVM	1452	LRR_8	PF13855.7	61	0.0092	90.1639	586	638
VITMroTrayshed_v2.0.hap1.chr12.ver2.0.g157320.t01	VITMroTrayshed_v2.1.hap1.chr12	15428801	15433972	-	NBS-LRR	EVM	1452	LRR_4	PF12799.8	43	0.46	86.0465	792	830
VITMroTrayshed_v2.0.hap1.chr12.ver2.0.g157320.t01	VITMroTrayshed_v2.1.hap1.chr12	15428801	15433972	-	NBS-LRR	EVM	1452	LRR_8	PF13855.7	61	2.7e-05	91.8033	1224	1281
VITMroTrayshed_v2.0.hap2.chr12.ver2.1.g402690.t01	VITMroTrayshed_v2.1.hap2.chr12	11952950	11959026	+	TIR-NBS-LRR	manual	1280	TIR	PF01582.21	176	1.2e-44	90.9091	24	186
VITMroTrayshed_v2.0.hap2.chr12.ver2.1.g402690.t01	VITMroTrayshed_v2.1.hap2.chr12	11952950	11959026	+	TIR-NBS-LRR	manual	1280	TIR_2	PF13676.7	121	1e-12	77.686	26	120
VITMroTrayshed_v2.0.hap2.chr12.ver2.1.g402690.t01	VITMroTrayshed_v2.1.hap2.chr12	11952950	11959026	+	TIR-NBS-LRR	manual	1280	NB-ARC	PF00931.23	252	8.3e-33	92.8571	202	432
VITMroTrayshed_v2.0.hap2.chr12.ver2.1.g402690.t01	VITMroTrayshed_v2.1.hap2.chr12	11952950	11959026	+	TIR-NBS-LRR	manual	1280	LRR_3	PF07725.13	20	0.47	100	636	655
VITMroTrayshed_v2.0.hap2.chr12.ver2.1.g402690.t01	VITMroTrayshed_v2.1.hap2.chr12	11952950	11959026	+	TIR-NBS-LRR	manual	1280	LRR_8	PF13855.7	61	0.0015	93.4426	637	691
VITMroTrayshed_v2.0.hap2.chr12.ver2.1.g402690.t01	VITMroTrayshed_v2.1.hap2.chr12	11952950	11959026	+	TIR-NBS-LRR	manual	1280	LRR_8	PF13855.7	61	0.016	96.7213	681	739
VITMroTrayshed_v2.0.hap2.chr12.ver2.1.g402690.t01	VITMroTrayshed_v2.1.hap2.chr12	11952950	11959026	+	TIR-NBS-LRR	manual	1280	LRR_8	PF13855.7	61	0.0003	62.2951	750	786
VITMroTrayshed_v2.0.hap2.chr12.ver2.1.g402690.t01	VITMroTrayshed_v2.1.hap2.chr12	11952950	11959026	+	TIR-NBS-LRR	manual	1280	LRR_4	PF12799.8	43	0.0033	86.0465	754	792
VITMroTrayshed_v2.0.hap2.chr12.ver2.1.g402690.t01	VITMroTrayshed_v2.1.hap2.chr12	11952950	11959026	+	TIR-NBS-LRR	manual	1280	LRR_8	PF13855.7	61	0.0003	62.2951	797	833
VITMroTrayshed_v2.0.hap2.chr12.ver2.1.g402690.t01	VITMroTrayshed_v2.1.hap2.chr12	11952950	11959026	+	TIR-NBS-LRR	manual	1280	LRR_4	PF12799.8	43	0.0033	86.0465	801	839
VITMroTrayshed_v2.0.hap2.chr12.ver2.1.g402690.t01	VITMroTrayshed_v2.1.hap2.chr12	11952950	11959026	+	TIR-NBS-LRR	manual	1280	LRR_8	PF13855.7	61	0.0035	62.2951	844	880
VITMroTrayshed_v2.0.hap2.chr12.ver2.1.g402690.t01	VITMroTrayshed_v2.1.hap2.chr12	11952950	11959026	+	TIR-NBS-LRR	manual	1280	LRR_4	PF12799.8	43	0.0066	88.3721	847	886
VITMroTrayshed_v2.0.hap2.chr12.ver2.1.g402690.t01	VITMroTrayshed_v2.1.hap2.chr12	11952950	11959026	+	TIR-NBS-LRR	manual	1280	LRR_8	PF13855.7	61	0.0035	62.2951	891	927
VITMroTrayshed_v2.0.hap2.chr12.ver2.1.g402690.t01	VITMroTrayshed_v2.1.hap2.chr12	11952950	11959026	+	TIR-NBS-LRR	manual	1280	LRR_4	PF12799.8	43	0.0066	88.3721	894	933
VITMroTrayshed_v2.0.hap2.chr12.ver2.1.g402690.t01	VITMroTrayshed_v2.1.hap2.chr12	11952950	11959026	+	TIR-NBS-LRR	manual	1280	LRR_8	PF13855.7	61	0.00023	62.2951	938	974
VITMroTrayshed_v2.0.hap2.chr12.ver2.1.g402690.t01	VITMroTrayshed_v2.1.hap2.chr12	11952950	11959026	+	TIR-NBS-LRR	manual	1280	LRR_4	PF12799.8	43	0.0016	86.0465	942	980
VITMroTrayshed_v2.0.hap2.chr12.ver2.1.g402690.t01	VITMroTrayshed_v2.1.hap2.chr12	11952950	11959026	+	TIR-NBS-LRR	manual	1280	LRR_8	PF13855.7	61	0.0035	62.2951	985	1021
VITMroTrayshed_v2.0.hap2.chr12.ver2.1.g402690.t01	VITMroTrayshed_v2.1.hap2.chr12	11952950	11959026	+	TIR-NBS-LRR	manual	1280	LRR_4	PF12799.8	43	0.0066	88.3721	988	1027
VITMroTrayshed_v2.0.hap2.chr12.ver2.1.g402690.t01	VITMroTrayshed_v2.1.hap2.chr12	11952950	11959026	+	TIR-NBS-LRR	manual	1280	LRR_8	PF13855.7	61	0.093	62.2951	1032	1068
VITMroTrayshed_v2.0.hap2.chr12.ver2.1.g402690.t01	VITMroTrayshed_v2.1.hap2.chr12	11952950	11959026	+	TIR-NBS-LRR	manual	1280	LRR_4	PF12799.8	43	0.66	76.7442	1039	1073
VITMroTrayshed_v2.0.hap2.chr12.ver2.1.g402690.t01	VITMroTrayshed_v2.1.hap2.chr12	11952950	11959026	+	TIR-NBS-LRR	manual	1280	LRR_8	PF13855.7	61	0.024	60.6557	1080	1115
VITMroTrayshed_v2.0.hap2.chr12.ver2.1.g402690.t01	VITMroTrayshed_v2.1.hap2.chr12	11952950	11959026	+	TIR-NBS-LRR	manual	1280	LRR_4	PF12799.8	43	0.038	67.4419	1087	1117
VITMroTrayshed_v2.0.hap2.chr12.ver2.0.g402740.t01	VITMroTrayshed_v2.1.hap2.chr12	12066888	12069854	+	TIR-NBS	EVM	596	TIR	PF01582.21	176	1e-47	91.4773	23	185
VITMroTrayshed_v2.0.hap2.chr12.ver2.0.g402740.t01	VITMroTrayshed_v2.1.hap2.chr12	12066888	12069854	+	TIR-NBS	EVM	596	TIR_2	PF13676.7	121	7.2e-15	80.9917	25	120
VITMroTrayshed_v2.0.hap2.chr12.ver2.0.g402740.t01	VITMroTrayshed_v2.1.hap2.chr12	12066888	12069854	+	TIR-NBS	EVM	596	NB-ARC	PF00931.23	252	2.3e-33	94.8413	200	435
VITMroTrayshed_v2.0.hap2.chr12.ver2.1.g402762.t01	VITMroTrayshed_v2.1.hap2.chr12	12144629	12149713	+	TIR-NBS-LRR	manual	783	TIR_2	PF13676.7	121	2.5e-12	68.595	26	108
VITMroTrayshed_v2.0.hap2.chr12.ver2.1.g402762.t01	VITMroTrayshed_v2.1.hap2.chr12	12144629	12149713	+	TIR-NBS-LRR	manual	783	NB-ARC	PF00931.23	252	1.3e-34	94.4444	136	370
VITMroTrayshed_v2.0.hap2.chr12.ver2.1.g402762.t01	VITMroTrayshed_v2.1.hap2.chr12	12144629	12149713	+	TIR-NBS-LRR	manual	783	LRR_8	PF13855.7	61	0.012	59.0164	470	504
VITMroTrayshed_v2.0.hap2.chr12.ver2.1.g402762.t01	VITMroTrayshed_v2.1.hap2.chr12	12144629	12149713	+	TIR-NBS-LRR	manual	783	LRR_4	PF12799.8	43	0.013	88.3721	472	511
VITMroTrayshed_v2.0.hap2.chr12.ver2.1.g402762.t01	VITMroTrayshed_v2.1.hap2.chr12	12144629	12149713	+	TIR-NBS-LRR	manual	783	LRR_8	PF13855.7	61	0.0096	62.2951	515	552
VITMroTrayshed_v2.0.hap2.chr12.ver2.1.g402762.t01	VITMroTrayshed_v2.1.hap2.chr12	12144629	12149713	+	TIR-NBS-LRR	manual	783	LRR_8	PF13855.7	61	0.0002	60.6557	564	599
VITMroTrayshed_v2.0.hap2.chr12.ver2.1.g402762.t01	VITMroTrayshed_v2.1.hap2.chr12	12144629	12149713	+	TIR-NBS-LRR	manual	783	LRR_4	PF12799.8	43	9.9e-05	88.3721	566	605
VITMroTrayshed_v2.0.hap2.chr12.ver2.1.g402762.t01	VITMroTrayshed_v2.1.hap2.chr12	12144629	12149713	+	TIR-NBS-LRR	manual	783	LRR_8	PF13855.7	61	0.00024	63.9344	609	646
VITMroTrayshed_v2.0.hap2.chr12.ver2.1.g402762.t01	VITMroTrayshed_v2.1.hap2.chr12	12144629	12149713	+	TIR-NBS-LRR	manual	783	LRR_4	PF12799.8	43	0.0091	79.0698	618	653
VITMroTrayshed_v2.0.hap2.chr12.ver2.1.g402762.t01	VITMroTrayshed_v2.1.hap2.chr12	12144629	12149713	+	TIR-NBS-LRR	manual	783	LRR_8	PF13855.7	61	0.0048	80.3279	647	693
VITMroTrayshed_v2.0.hap2.chr12.ver2.1.g402762.t01	VITMroTrayshed_v2.1.hap2.chr12	12144629	12149713	+	TIR-NBS-LRR	manual	783	LRR_4	PF12799.8	43	0.0035	88.3721	660	699
VITMroTrayshed_v2.0.hap2.chr12.ver2.1.g402762.t01	VITMroTrayshed_v2.1.hap2.chr12	12144629	12149713	+	TIR-NBS-LRR	manual	783	LRR_8	PF13855.7	61	0.0042	67.2131	701	740
VITMroTrayshed_v2.0.hap2.chr12.ver2.1.g402762.t01	VITMroTrayshed_v2.1.hap2.chr12	12144629	12149713	+	TIR-NBS-LRR	manual	783	LRR_4	PF12799.8	43	0.0018	79.0698	707	742
VITMroTrayshed_v2.0.hap2.chr12.ver2.1.g402800.t01	VITMroTrayshed_v2.1.hap2.chr12	12208023	12211025	+	TIR-NBS	manual	460	TIR	PF01582.21	176	3.7e-43	91.4773	24	186
VITMroTrayshed_v2.0.hap2.chr12.ver2.1.g402800.t01	VITMroTrayshed_v2.1.hap2.chr12	12208023	12211025	+	TIR-NBS	manual	460	TIR_2	PF13676.7	121	6.1e-13	80.9917	26	121
VITMroTrayshed_v2.0.hap2.chr12.ver2.1.g402800.t01	VITMroTrayshed_v2.1.hap2.chr12	12208023	12211025	+	TIR-NBS	manual	460	NB-ARC	PF00931.23	252	1.1e-35	94.8413	201	436
VITMroTrayshed_v2.0.hap2.chr12.ver2.1.g402820.t01	VITMroTrayshed_v2.1.hap2.chr12	12256240	12262340	+	TIR-NBS-LRR	manual	1260	TIR	PF01582.21	176	4.4e-47	91.4773	24	187
VITMroTrayshed_v2.0.hap2.chr12.ver2.1.g402820.t01	VITMroTrayshed_v2.1.hap2.chr12	12256240	12262340	+	TIR-NBS-LRR	manual	1260	TIR_2	PF13676.7	121	4e-13	80.9917	26	121
VITMroTrayshed_v2.0.hap2.chr12.ver2.1.g402820.t01	VITMroTrayshed_v2.1.hap2.chr12	12256240	12262340	+	TIR-NBS-LRR	manual	1260	NB-ARC	PF00931.23	252	1.1e-32	90.4762	201	424
VITMroTrayshed_v2.0.hap2.chr12.ver2.1.g402820.t01	VITMroTrayshed_v2.1.hap2.chr12	12256240	12262340	+	TIR-NBS-LRR	manual	1260	LRR_3	PF07725.13	20	0.0066	85	633	649
VITMroTrayshed_v2.0.hap2.chr12.ver2.1.g402820.t01	VITMroTrayshed_v2.1.hap2.chr12	12256240	12262340	+	TIR-NBS-LRR	manual	1260	LRR_8	PF13855.7	61	0.00074	95.082	633	688
VITMroTrayshed_v2.0.hap2.chr12.ver2.1.g402820.t01	VITMroTrayshed_v2.1.hap2.chr12	12256240	12262340	+	TIR-NBS-LRR	manual	1260	LRR_8	PF13855.7	61	0.015	72.1311	694	736
VITMroTrayshed_v2.0.hap2.chr12.ver2.1.g402820.t01	VITMroTrayshed_v2.1.hap2.chr12	12256240	12262340	+	TIR-NBS-LRR	manual	1260	LRR_4	PF12799.8	43	0.023	88.3721	702	742
VITMroTrayshed_v2.0.hap2.chr12.ver2.1.g402820.t01	VITMroTrayshed_v2.1.hap2.chr12	12256240	12262340	+	TIR-NBS-LRR	manual	1260	LRR_8	PF13855.7	61	0.00048	62.2951	747	783
VITMroTrayshed_v2.0.hap2.chr12.ver2.1.g402820.t01	VITMroTrayshed_v2.1.hap2.chr12	12256240	12262340	+	TIR-NBS-LRR	manual	1260	LRR_4	PF12799.8	43	0.00013	88.3721	750	789
VITMroTrayshed_v2.0.hap2.chr12.ver2.1.g402820.t01	VITMroTrayshed_v2.1.hap2.chr12	12256240	12262340	+	TIR-NBS-LRR	manual	1260	LRR_8	PF13855.7	61	0.0007	62.2951	794	830
VITMroTrayshed_v2.0.hap2.chr12.ver2.1.g402820.t01	VITMroTrayshed_v2.1.hap2.chr12	12256240	12262340	+	TIR-NBS-LRR	manual	1260	LRR_4	PF12799.8	43	0.007	90.6977	797	837
VITMroTrayshed_v2.0.hap2.chr12.ver2.1.g402820.t01	VITMroTrayshed_v2.1.hap2.chr12	12256240	12262340	+	TIR-NBS-LRR	manual	1260	LRR_8	PF13855.7	61	0.0065	60.6557	842	877
VITMroTrayshed_v2.0.hap2.chr12.ver2.1.g402820.t01	VITMroTrayshed_v2.1.hap2.chr12	12256240	12262340	+	TIR-NBS-LRR	manual	1260	LRR_4	PF12799.8	43	0.0016	88.3721	844	883
VITMroTrayshed_v2.0.hap2.chr12.ver2.1.g402820.t01	VITMroTrayshed_v2.1.hap2.chr12	12256240	12262340	+	TIR-NBS-LRR	manual	1260	LRR_8	PF13855.7	61	0.0046	62.2951	888	924
VITMroTrayshed_v2.0.hap2.chr12.ver2.1.g402820.t01	VITMroTrayshed_v2.1.hap2.chr12	12256240	12262340	+	TIR-NBS-LRR	manual	1260	LRR_4	PF12799.8	43	0.00061	88.3721	891	930
VITMroTrayshed_v2.0.hap2.chr12.ver2.1.g402820.t01	VITMroTrayshed_v2.1.hap2.chr12	12256240	12262340	+	TIR-NBS-LRR	manual	1260	LRR_8	PF13855.7	61	0.76	62.2951	935	971
VITMroTrayshed_v2.0.hap2.chr12.ver2.1.g402820.t01	VITMroTrayshed_v2.1.hap2.chr12	12256240	12262340	+	TIR-NBS-LRR	manual	1260	LRR_4	PF12799.8	43	0.015	79.0698	938	973
VITMroTrayshed_v2.0.hap2.chr12.ver2.0.g402890.t01	VITMroTrayshed_v2.1.hap2.chr12	12426243	12427376	-	CC-NBS	EVM	377	Coils		21			42	62
VITMroTrayshed_v2.0.hap2.chr12.ver2.0.g402890.t01	VITMroTrayshed_v2.1.hap2.chr12	12426243	12427376	-	CC-NBS	EVM	377	NB-ARC	PF00931.23	252	4.1e-48	78.9683	171	369
VITMroTrayshed_v2.0.hap2.chr12.ver2.1.g403040.t01	VITMroTrayshed_v2.1.hap2.chr12	12671790	12677764	+	TIR-NBS-LRR	manual	1278	TIR	PF01582.21	176	3.6e-46	98.2955	20	195
VITMroTrayshed_v2.0.hap2.chr12.ver2.1.g403040.t01	VITMroTrayshed_v2.1.hap2.chr12	12671790	12677764	+	TIR-NBS-LRR	manual	1278	TIR_2	PF13676.7	121	1.6e-13	80.9917	23	118
VITMroTrayshed_v2.0.hap2.chr12.ver2.1.g403040.t01	VITMroTrayshed_v2.1.hap2.chr12	12671790	12677764	+	TIR-NBS-LRR	manual	1278	NB-ARC	PF00931.23	252	1.1e-24	85.3175	213	421
VITMroTrayshed_v2.0.hap2.chr12.ver2.1.g403040.t01	VITMroTrayshed_v2.1.hap2.chr12	12671790	12677764	+	TIR-NBS-LRR	manual	1278	LRR_3	PF07725.13	20	2.8e-06	100	628	647
VITMroTrayshed_v2.0.hap2.chr12.ver2.1.g403040.t01	VITMroTrayshed_v2.1.hap2.chr12	12671790	12677764	+	TIR-NBS-LRR	manual	1278	LRR_4	PF12799.8	43	0.059	90.6977	697	737
VITMroTrayshed_v2.0.hap2.chr12.ver2.1.g403040.t01	VITMroTrayshed_v2.1.hap2.chr12	12671790	12677764	+	TIR-NBS-LRR	manual	1278	LRR_8	PF13855.7	61	0.28	95.082	721	777
VITMroTrayshed_v2.0.hap2.chr12.ver2.1.g403040.t01	VITMroTrayshed_v2.1.hap2.chr12	12671790	12677764	+	TIR-NBS-LRR	manual	1278	LRR_8	PF13855.7	61	0.86	95.082	745	801
VITMroTrayshed_v2.0.hap2.chr12.ver2.1.g403040.t01	VITMroTrayshed_v2.1.hap2.chr12	12671790	12677764	+	TIR-NBS-LRR	manual	1278	LRR_8	PF13855.7	61	0.47	96.7213	769	827
VITMroTrayshed_v2.0.hap2.chr12.ver2.1.g403040.t01	VITMroTrayshed_v2.1.hap2.chr12	12671790	12677764	+	TIR-NBS-LRR	manual	1278	LRR_4	PF12799.8	43	0.79	88.3721	791	830
VITMroTrayshed_v2.0.hap2.chr12.ver2.1.g403040.t01	VITMroTrayshed_v2.1.hap2.chr12	12671790	12677764	+	TIR-NBS-LRR	manual	1278	LRR_8	PF13855.7	61	0.0098	95.082	816	872
VITMroTrayshed_v2.0.hap2.chr12.ver2.1.g403040.t01	VITMroTrayshed_v2.1.hap2.chr12	12671790	12677764	+	TIR-NBS-LRR	manual	1278	LRR_4	PF12799.8	43	0.39	81.3953	842	879
VITMroTrayshed_v2.0.hap2.chr12.ver2.1.g403040.t01	VITMroTrayshed_v2.1.hap2.chr12	12671790	12677764	+	TIR-NBS-LRR	manual	1278	LRR_4	PF12799.8	43	0.014	93.0233	951	993
VITMroTrayshed_v2.0.hap2.chr12.ver2.1.g403040.t01	VITMroTrayshed_v2.1.hap2.chr12	12671790	12677764	+	TIR-NBS-LRR	manual	1278	LRR_8	PF13855.7	61	0.0012	95.082	951	1007
VITMroTrayshed_v2.0.hap2.chr12.ver2.1.g403040.t01	VITMroTrayshed_v2.1.hap2.chr12	12671790	12677764	+	TIR-NBS-LRR	manual	1278	LRR_4	PF12799.8	43	0.18	93.0233	976	1016
VITMroTrayshed_v2.0.hap2.chr12.ver2.0.g403120.t01	VITMroTrayshed_v2.1.hap2.chr12	12812804	12816619	+	RPW8-NBS-LRR	.	1271	RPW8	PF05659.12	139	0.75	58.2734	5	90
VITMroTrayshed_v2.0.hap2.chr12.ver2.0.g403120.t01	VITMroTrayshed_v2.1.hap2.chr12	12812804	12816619	+	RPW8-NBS-LRR	.	1271	NB-ARC	PF00931.23	252	5.1e-52	86.9048	175	395
VITMroTrayshed_v2.0.hap2.chr12.ver2.0.g403120.t01	VITMroTrayshed_v2.1.hap2.chr12	12812804	12816619	+	RPW8-NBS-LRR	.	1271	LRR_4	PF12799.8	43	0.26	79.0698	782	817
VITMroTrayshed_v2.0.hap2.chr12.ver2.0.g403130.t01	VITMroTrayshed_v2.1.hap2.chr12	12821110	12824934	+	CC-NBS-LRR	EVM	1274	Coils		21			42	62
VITMroTrayshed_v2.0.hap2.chr12.ver2.0.g403130.t01	VITMroTrayshed_v2.1.hap2.chr12	12821110	12824934	+	CC-NBS-LRR	EVM	1274	Coils		21			73	93
VITMroTrayshed_v2.0.hap2.chr12.ver2.0.g403130.t01	VITMroTrayshed_v2.1.hap2.chr12	12821110	12824934	+	CC-NBS-LRR	EVM	1274	NB-ARC	PF00931.23	252	8.4e-53	87.3016	167	387
VITMroTrayshed_v2.0.hap2.chr12.ver2.0.g403130.t01	VITMroTrayshed_v2.1.hap2.chr12	12821110	12824934	+	CC-NBS-LRR	EVM	1274	LRR_8	PF13855.7	61	7.6e-05	95.082	587	642
VITMroTrayshed_v2.0.hap2.chr12.ver2.0.g403130.t01	VITMroTrayshed_v2.1.hap2.chr12	12821110	12824934	+	CC-NBS-LRR	EVM	1274	LRR_4	PF12799.8	43	0.088	86.0465	588	625
VITMroTrayshed_v2.0.hap2.chr12.ver2.0.g403130.t01	VITMroTrayshed_v2.1.hap2.chr12	12821110	12824934	+	CC-NBS-LRR	EVM	1274	LRR_8	PF13855.7	61	0.79	86.8852	633	684
VITMroTrayshed_v2.0.hap2.chr12.ver2.0.g403140.t01	VITMroTrayshed_v2.1.hap2.chr12	12854619	12858248	+	CC-NBS-LRR	EVM	1209	Coils		21			42	62
VITMroTrayshed_v2.0.hap2.chr12.ver2.0.g403140.t01	VITMroTrayshed_v2.1.hap2.chr12	12854619	12858248	+	CC-NBS-LRR	EVM	1209	Coils		21			73	93
VITMroTrayshed_v2.0.hap2.chr12.ver2.0.g403140.t01	VITMroTrayshed_v2.1.hap2.chr12	12854619	12858248	+	CC-NBS-LRR	EVM	1209	NB-ARC	PF00931.23	252	9.9e-53	86.1111	170	386
VITMroTrayshed_v2.0.hap2.chr12.ver2.0.g403140.t01	VITMroTrayshed_v2.1.hap2.chr12	12854619	12858248	+	CC-NBS-LRR	EVM	1209	LRR_8	PF13855.7	61	9e-05	93.4426	586	640
VITMroTrayshed_v2.0.hap2.chr12.ver2.0.g403140.t01	VITMroTrayshed_v2.1.hap2.chr12	12854619	12858248	+	CC-NBS-LRR	EVM	1209	LRR_4	PF12799.8	43	0.55	86.0465	587	624
VITMroTrayshed_v2.0.hap2.chr12.ver2.0.g403140.t01	VITMroTrayshed_v2.1.hap2.chr12	12854619	12858248	+	CC-NBS-LRR	EVM	1209	LRR_8	PF13855.7	61	0.44	86.8852	632	683
VITMroTrayshed_v2.0.hap2.chr12.ver2.0.g403140.t01	VITMroTrayshed_v2.1.hap2.chr12	12854619	12858248	+	CC-NBS-LRR	EVM	1209	LRR_4	PF12799.8	43	0.39	65.1163	792	820
VITMroTrayshed_v2.0.hap2.chr12.ver2.0.g403160.t01	VITMroTrayshed_v2.1.hap2.chr12	12880979	12884602	+	NBS-LRR	EVM	1207	Coils		21			41	61
VITMroTrayshed_v2.0.hap2.chr12.ver2.0.g403160.t01	VITMroTrayshed_v2.1.hap2.chr12	12880979	12884602	+	NBS-LRR	EVM	1207	Coils		21			72	92
VITMroTrayshed_v2.0.hap2.chr12.ver2.0.g403160.t01	VITMroTrayshed_v2.1.hap2.chr12	12880979	12884602	+	NBS-LRR	EVM	1207	NB-ARC	PF00931.23	252	1e-50	85.3175	181	399
VITMroTrayshed_v2.0.hap2.chr12.ver2.0.g403160.t01	VITMroTrayshed_v2.1.hap2.chr12	12880979	12884602	+	NBS-LRR	EVM	1207	LRR_8	PF13855.7	61	7.3e-05	90.1639	598	650
VITMroTrayshed_v2.0.hap2.chr12.ver2.0.g403160.t01	VITMroTrayshed_v2.1.hap2.chr12	12880979	12884602	+	NBS-LRR	EVM	1207	LRR_4	PF12799.8	43	0.054	86.0465	599	636
VITMroTrayshed_v2.0.hap2.chr12.ver2.0.g403160.t01	VITMroTrayshed_v2.1.hap2.chr12	12880979	12884602	+	NBS-LRR	EVM	1207	LRR_8	PF13855.7	61	0.16	86.8852	644	695
VITMroTrayshed_v2.0.hap2.chr12.ver2.0.g403160.t01	VITMroTrayshed_v2.1.hap2.chr12	12880979	12884602	+	NBS-LRR	EVM	1207	LRR_4	PF12799.8	43	0.37	65.1163	804	832
VITMroTrayshed_v2.0.hap2.chr12.ver2.0.g403400.t01	VITMroTrayshed_v2.1.hap2.chr12	13173692	13177669	+	RPW8-NBS-LRR	.	1325	RPW8	PF05659.12	139	0.14	58.2734	5	90
VITMroTrayshed_v2.0.hap2.chr12.ver2.0.g403400.t01	VITMroTrayshed_v2.1.hap2.chr12	13173692	13177669	+	RPW8-NBS-LRR	.	1325	NB-ARC	PF00931.23	252	6.1e-52	87.3016	176	395
VITMroTrayshed_v2.0.hap2.chr12.ver2.0.g403400.t01	VITMroTrayshed_v2.1.hap2.chr12	13173692	13177669	+	RPW8-NBS-LRR	.	1325	LRR_8	PF13855.7	61	0.67	59.0164	580	614
VITMroTrayshed_v2.0.hap2.chr12.ver2.0.g403400.t01	VITMroTrayshed_v2.1.hap2.chr12	13173692	13177669	+	RPW8-NBS-LRR	.	1325	LRR_4	PF12799.8	43	0.037	83.7209	583	620
VITMroTrayshed_v2.0.hap2.chr12.ver2.0.g403400.t01	VITMroTrayshed_v2.1.hap2.chr12	13173692	13177669	+	RPW8-NBS-LRR	.	1325	LRR_8	PF13855.7	61	0.12	93.4426	583	638
VITMroTrayshed_v2.0.hap2.chr12.ver2.0.g403400.t01	VITMroTrayshed_v2.1.hap2.chr12	13173692	13177669	+	RPW8-NBS-LRR	.	1325	LRR_8	PF13855.7	61	0.79	86.8852	629	680
VITMroTrayshed_v2.0.hap2.chr12.ver2.0.g403400.t01	VITMroTrayshed_v2.1.hap2.chr12	13173692	13177669	+	RPW8-NBS-LRR	.	1325	LRR_4	PF12799.8	43	0.52	65.1163	653	681
VITMroTrayshed_v2.0.hap2.chr12.ver2.0.g403400.t01	VITMroTrayshed_v2.1.hap2.chr12	13173692	13177669	+	RPW8-NBS-LRR	.	1325	LRR_8	PF13855.7	61	0.00081	80.3279	1223	1272
VITMroTrayshed_v2.0.hap2.chr12.ver2.0.g403700.t01	VITMroTrayshed_v2.1.hap2.chr12	13742698	13746968	+	NBS-LRR	.	1399	Coils		21			143	163
VITMroTrayshed_v2.0.hap2.chr12.ver2.0.g403700.t01	VITMroTrayshed_v2.1.hap2.chr12	13742698	13746968	+	NBS-LRR	.	1399	NB-ARC	PF00931.23	252	3.5e-54	86.1111	200	417
VITMroTrayshed_v2.0.hap2.chr12.ver2.0.g403700.t01	VITMroTrayshed_v2.1.hap2.chr12	13742698	13746968	+	NBS-LRR	.	1399	LRR_8	PF13855.7	61	0.093	67.2131	614	653
VITMroTrayshed_v2.0.hap2.chr12.ver2.0.g403700.t01	VITMroTrayshed_v2.1.hap2.chr12	13742698	13746968	+	NBS-LRR	.	1399	LRR_8	PF13855.7	61	0.00015	96.7213	1186	1246
VITMroTrayshed_v2.0.hap2.chr12.ver2.0.g403720.t01	VITMroTrayshed_v2.1.hap2.chr12	13757220	13758659	+	NBS	EVM	479	NB-ARC	PF00931.23	252	3.4e-49	82.1429	198	400
VITMroTrayshed_v2.0.hap2.chr12.ver2.0.g403740.t01	VITMroTrayshed_v2.1.hap2.chr12	13779417	13783487	+	NBS-LRR	EVM	1356	NB-ARC	PF00931.23	252	3e-50	82.5397	197	400
VITMroTrayshed_v2.0.hap2.chr12.ver2.0.g403740.t01	VITMroTrayshed_v2.1.hap2.chr12	13779417	13783487	+	NBS-LRR	EVM	1356	LRR_4	PF12799.8	43	9.8e-05	93.0233	580	617
VITMroTrayshed_v2.0.hap2.chr12.ver2.0.g403740.t01	VITMroTrayshed_v2.1.hap2.chr12	13779417	13783487	+	NBS-LRR	EVM	1356	LRR_8	PF13855.7	61	0.00013	88.5246	580	631
VITMroTrayshed_v2.0.hap2.chr12.ver2.0.g403740.t01	VITMroTrayshed_v2.1.hap2.chr12	13779417	13783487	+	NBS-LRR	EVM	1356	LRR_8	PF13855.7	61	0.047	86.8852	625	675
VITMroTrayshed_v2.0.hap2.chr12.ver2.0.g403740.t01	VITMroTrayshed_v2.1.hap2.chr12	13779417	13783487	+	NBS-LRR	EVM	1356	LRR_4	PF12799.8	43	0.64	65.1163	648	676
VITMroTrayshed_v2.0.hap2.chr12.ver2.0.g403740.t01	VITMroTrayshed_v2.1.hap2.chr12	13779417	13783487	+	NBS-LRR	EVM	1356	LRR_4	PF12799.8	43	0.1	74.4186	781	813
VITMroTrayshed_v2.0.hap2.chr12.ver2.0.g403740.t01	VITMroTrayshed_v2.1.hap2.chr12	13779417	13783487	+	NBS-LRR	EVM	1356	LRR_4	PF12799.8	43	0.97	72.093	1143	1176
VITMroTrayshed_v2.0.hap2.chr12.ver2.0.g403740.t01	VITMroTrayshed_v2.1.hap2.chr12	13779417	13783487	+	NBS-LRR	EVM	1356	LRR_4	PF12799.8	43	0.5	83.7209	1194	1233
VITMroTrayshed_v2.0.hap2.chr12.ver2.0.g403740.t01	VITMroTrayshed_v2.1.hap2.chr12	13779417	13783487	+	NBS-LRR	EVM	1356	LRR_8	PF13855.7	61	0.091	93.4426	1194	1252
VITMroTrayshed_v2.0.hap2.chr12.ver2.0.g403740.t01	VITMroTrayshed_v2.1.hap2.chr12	13779417	13783487	+	NBS-LRR	EVM	1356	LRR_8	PF13855.7	61	0.48	95.082	1243	1302
VITMroTrayshed_v2.0.hap2.chr12.ver2.0.g403740.t01	VITMroTrayshed_v2.1.hap2.chr12	13779417	13783487	+	NBS-LRR	EVM	1356	zf-MIZ	PF02891.21	50	0.26	54	1301	1327
VITMroTrayshed_v2.0.hap2.chr12.ver2.0.g403800.t01	VITMroTrayshed_v2.1.hap2.chr12	13905676	13907279	-	NBS	EVM	349	NB-ARC	PF00931.23	252	1e-31	60.7143	198	347
VITMroTrayshed_v2.0.hap2.chr12.ver2.0.g403820.t01	VITMroTrayshed_v2.1.hap2.chr12	13930737	13934702	+	NBS-LRR	EVM	1289	NB-ARC	PF00931.23	252	8.3e-29	50.3968	226	354
VITMroTrayshed_v2.0.hap2.chr12.ver2.0.g403820.t01	VITMroTrayshed_v2.1.hap2.chr12	13930737	13934702	+	NBS-LRR	EVM	1289	LRR_8	PF13855.7	61	0.0031	88.5246	537	588
VITMroTrayshed_v2.0.hap2.chr12.ver2.0.g403820.t01	VITMroTrayshed_v2.1.hap2.chr12	13930737	13934702	+	NBS-LRR	EVM	1289	LRR_4	PF12799.8	43	0.88	67.4419	559	588
VITMroTrayshed_v2.0.hap2.chr12.ver2.0.g403820.t01	VITMroTrayshed_v2.1.hap2.chr12	13930737	13934702	+	NBS-LRR	EVM	1289	LRR_4	PF12799.8	43	0.73	74.4186	606	641
VITMroTrayshed_v2.0.hap2.chr12.ver2.0.g403820.t01	VITMroTrayshed_v2.1.hap2.chr12	13930737	13934702	+	NBS-LRR	EVM	1289	LRR_4	PF12799.8	43	0.25	67.4419	739	768
VITMroTrayshed_v2.0.hap2.chr12.ver2.0.g403820.t01	VITMroTrayshed_v2.1.hap2.chr12	13930737	13934702	+	NBS-LRR	EVM	1289	LRR_4	PF12799.8	43	0.88	72.093	1101	1134
VITMroTrayshed_v2.0.hap2.chr12.ver2.0.g403840.t01	VITMroTrayshed_v2.1.hap2.chr12	13953152	13957243	-	NBS-LRR	.	1363	NB-ARC	PF00931.23	252	7e-48	86.1111	181	402
VITMroTrayshed_v2.0.hap2.chr12.ver2.0.g403840.t01	VITMroTrayshed_v2.1.hap2.chr12	13953152	13957243	-	NBS-LRR	.	1363	LRR_8	PF13855.7	61	0.0004	95.082	585	640
VITMroTrayshed_v2.0.hap2.chr12.ver2.0.g403840.t01	VITMroTrayshed_v2.1.hap2.chr12	13953152	13957243	-	NBS-LRR	.	1363	LRR_4	PF12799.8	43	0.032	95.3488	607	646
VITMroTrayshed_v2.0.hap2.chr12.ver2.0.g403840.t01	VITMroTrayshed_v2.1.hap2.chr12	13953152	13957243	-	NBS-LRR	.	1363	LRR_4	PF12799.8	43	0.037	93.0233	630	675
VITMroTrayshed_v2.0.hap2.chr12.ver2.0.g403840.t01	VITMroTrayshed_v2.1.hap2.chr12	13953152	13957243	-	NBS-LRR	.	1363	LRR_8	PF13855.7	61	0.0099	86.8852	630	681
VITMroTrayshed_v2.0.hap2.chr12.ver2.0.g403840.t01	VITMroTrayshed_v2.1.hap2.chr12	13953152	13957243	-	NBS-LRR	.	1363	LRR_8	PF13855.7	61	0.17	96.7213	1225	1285
VITMroTrayshed_v2.0.hap2.chr12.ver2.0.g403840.t01	VITMroTrayshed_v2.1.hap2.chr12	13953152	13957243	-	NBS-LRR	.	1363	LRR_8	PF13855.7	61	0.95	86.8852	1250	1304
VITMroTrayshed_v2.0.hap2.chr12.ver2.0.g403860.t01	VITMroTrayshed_v2.1.hap2.chr12	13977050	13981201	-	NBS-LRR	.	1383	NB-ARC	PF00931.23	252	4.9e-52	98.8095	183	418
VITMroTrayshed_v2.0.hap2.chr12.ver2.0.g403860.t01	VITMroTrayshed_v2.1.hap2.chr12	13977050	13981201	-	NBS-LRR	.	1383	LRR_4	PF12799.8	43	0.24	88.3721	578	616
VITMroTrayshed_v2.0.hap2.chr12.ver2.0.g403860.t01	VITMroTrayshed_v2.1.hap2.chr12	13977050	13981201	-	NBS-LRR	.	1383	LRR_8	PF13855.7	61	0.00031	93.4426	579	633
VITMroTrayshed_v2.0.hap2.chr12.ver2.0.g403860.t01	VITMroTrayshed_v2.1.hap2.chr12	13977050	13981201	-	NBS-LRR	.	1383	LRR_4	PF12799.8	43	0.0035	86.0465	780	818
VITMroTrayshed_v2.0.hap2.chr12.ver2.0.g403860.t01	VITMroTrayshed_v2.1.hap2.chr12	13977050	13981201	-	NBS-LRR	.	1383	LRR_5	PF13306.7	128	0.064	75.7812	1197	1302
VITMroTrayshed_v2.0.hap2.chr12.ver2.0.g403860.t01	VITMroTrayshed_v2.1.hap2.chr12	13977050	13981201	-	NBS-LRR	.	1383	LRR_8	PF13855.7	61	0.12	90.1639	1198	1254
VITMroTrayshed_v2.0.hap2.chr12.ver2.0.g403860.t01	VITMroTrayshed_v2.1.hap2.chr12	13977050	13981201	-	NBS-LRR	.	1383	LRR_8	PF13855.7	61	0.00066	95.082	1220	1279
VITMroTrayshed_v2.0.hap2.chr12.ver2.0.g403860.t01	VITMroTrayshed_v2.1.hap2.chr12	13977050	13981201	-	NBS-LRR	.	1383	LRR_4	PF12799.8	43	0.017	88.3721	1244	1285
VITMroTrayshed_v2.0.hap2.chr12.ver2.0.g403860.t01	VITMroTrayshed_v2.1.hap2.chr12	13977050	13981201	-	NBS-LRR	.	1383	LRR_4	PF12799.8	43	0.027	93.0233	1269	1312
VITMroTrayshed_v2.0.hap2.chr12.ver2.0.g403860.t01	VITMroTrayshed_v2.1.hap2.chr12	13977050	13981201	-	NBS-LRR	.	1383	LRR_8	PF13855.7	61	0.00057	95.082	1270	1329
VITMroTrayshed_v2.0.hap1.chr12.ver2.1.g157040.t01	VITMroTrayshed_v2.1.hap2.chr12	14256841	14261061	+	CC-NBS-LRR	manual	1406	Coils		21			126	146
VITMroTrayshed_v2.0.hap1.chr12.ver2.1.g157040.t01	VITMroTrayshed_v2.1.hap2.chr12	14256841	14261061	+	CC-NBS-LRR	manual	1406	NB-ARC	PF00931.23	252	4.5e-49	96.8254	181	418
VITMroTrayshed_v2.0.hap1.chr12.ver2.1.g157040.t01	VITMroTrayshed_v2.1.hap2.chr12	14256841	14261061	+	CC-NBS-LRR	manual	1406	LRR_8	PF13855.7	61	0.0019	93.4426	596	650
VITMroTrayshed_v2.0.hap1.chr12.ver2.1.g157040.t01	VITMroTrayshed_v2.1.hap2.chr12	14256841	14261061	+	CC-NBS-LRR	manual	1406	LRR_4	PF12799.8	43	0.25	83.7209	597	633
VITMroTrayshed_v2.0.hap1.chr12.ver2.1.g157040.t01	VITMroTrayshed_v2.1.hap2.chr12	14256841	14261061	+	CC-NBS-LRR	manual	1406	LRR_4	PF12799.8	43	0.39	72.093	799	830
VITMroTrayshed_v2.0.hap1.chr12.ver2.1.g157040.t01	VITMroTrayshed_v2.1.hap2.chr12	14256841	14261061	+	CC-NBS-LRR	manual	1406	LRR_8	PF13855.7	61	7.6e-06	96.7213	1242	1302
VITMroTrayshed_v2.0.hap1.chr12.ver2.1.g157040.t01	VITMroTrayshed_v2.1.hap2.chr12	14256841	14261061	+	CC-NBS-LRR	manual	1406	LRR_4	PF12799.8	43	0.067	88.3721	1268	1309
VITMroTrayshed_v2.0.hap1.chr12.ver2.0.g157180.t01	VITMroTrayshed_v2.1.hap2.chr12	14400953	14402169	+	CC-NBS	EVM	377	Coils		21			68	92
VITMroTrayshed_v2.0.hap1.chr12.ver2.0.g157180.t01	VITMroTrayshed_v2.1.hap2.chr12	14400953	14402169	+	CC-NBS	EVM	377	Coils		21			133	153
VITMroTrayshed_v2.0.hap1.chr12.ver2.0.g157180.t01	VITMroTrayshed_v2.1.hap2.chr12	14400953	14402169	+	CC-NBS	EVM	377	NB-ARC	PF00931.23	252	3.2e-50	78.1746	177	374
VITMroTrayshed_v2.0.hap2.chr12.ver2.0.g404330.t01	VITMroTrayshed_v2.1.hap2.chr12	14521024	14525334	-	NBS-LRR	.	1436	NB-ARC	PF00931.23	252	6.2e-49	87.3016	185	404
VITMroTrayshed_v2.0.hap2.chr12.ver2.0.g404330.t01	VITMroTrayshed_v2.1.hap2.chr12	14521024	14525334	-	NBS-LRR	.	1436	LRR_8	PF13855.7	61	0.015	91.8033	586	639
VITMroTrayshed_v2.0.hap2.chr12.ver2.0.g404330.t01	VITMroTrayshed_v2.1.hap2.chr12	14521024	14525334	-	NBS-LRR	.	1436	LRR_4	PF12799.8	43	0.27	86.0465	587	624
VITMroTrayshed_v2.0.hap2.chr12.ver2.0.g404330.t01	VITMroTrayshed_v2.1.hap2.chr12	14521024	14525334	-	NBS-LRR	.	1436	LRR_4	PF12799.8	43	0.44	83.7209	792	829
VITMroTrayshed_v2.0.hap2.chr12.ver2.0.g404330.t01	VITMroTrayshed_v2.1.hap2.chr12	14521024	14525334	-	NBS-LRR	.	1436	LRR_8	PF13855.7	61	1.6e-05	96.7213	1225	1285
VITMroTrayshed_v2.0.hap2.chr12.ver2.0.g404330.t01	VITMroTrayshed_v2.1.hap2.chr12	14521024	14525334	-	NBS-LRR	.	1436	LRR_8	PF13855.7	61	2.5e-06	91.8033	1250	1307
VITMroTrayshed_v2.0.hap2.chr12.ver2.0.g404330.t01	VITMroTrayshed_v2.1.hap2.chr12	14521024	14525334	-	NBS-LRR	.	1436	LRR_8	PF13855.7	61	1	80.3279	1285	1332
VITMroTrayshed_v2.0.hap2.chr12.ver2.0.g404340.t01	VITMroTrayshed_v2.1.hap2.chr12	14540960	14546087	-	NBS-LRR	EVM	1562	NB-ARC	PF00931.23	252	2.3e-48	87.3016	185	404
VITMroTrayshed_v2.0.hap2.chr12.ver2.0.g404340.t01	VITMroTrayshed_v2.1.hap2.chr12	14540960	14546087	-	NBS-LRR	EVM	1562	LRR_8	PF13855.7	61	0.0012	95.082	588	643
VITMroTrayshed_v2.0.hap2.chr12.ver2.0.g404340.t01	VITMroTrayshed_v2.1.hap2.chr12	14540960	14546087	-	NBS-LRR	EVM	1562	LRR_4	PF12799.8	43	0.4	86.0465	589	626
VITMroTrayshed_v2.0.hap2.chr12.ver2.0.g404340.t01	VITMroTrayshed_v2.1.hap2.chr12	14540960	14546087	-	NBS-LRR	EVM	1562	LRR_8	PF13855.7	61	0.00084	88.5246	1227	1282
VITMroTrayshed_v2.0.hap2.chr12.ver2.0.g404350.t01	VITMroTrayshed_v2.1.hap2.chr12	14569133	14573371	-	NBS-LRR	EVM	1412	NB-ARC	PF00931.23	252	1.2e-49	82.5397	197	404
VITMroTrayshed_v2.0.hap2.chr12.ver2.0.g404350.t01	VITMroTrayshed_v2.1.hap2.chr12	14569133	14573371	-	NBS-LRR	EVM	1412	LRR_8	PF13855.7	61	0.015	90.1639	586	638
VITMroTrayshed_v2.0.hap2.chr12.ver2.0.g404350.t01	VITMroTrayshed_v2.1.hap2.chr12	14569133	14573371	-	NBS-LRR	EVM	1412	LRR_8	PF13855.7	61	0.18	95.082	1201	1260
VITMroTrayshed_v2.0.hap2.chr12.ver2.0.g404350.t01	VITMroTrayshed_v2.1.hap2.chr12	14569133	14573371	-	NBS-LRR	EVM	1412	LRR_8	PF13855.7	61	1.1e-06	91.8033	1251	1308
VITMroTrayshed_v2.0.hap2.chr12.ver2.0.g404350.t01	VITMroTrayshed_v2.1.hap2.chr12	14569133	14573371	-	NBS-LRR	EVM	1412	LRR_8	PF13855.7	61	0.052	93.4426	1277	1333
VITMroTrayshed_v2.0.hap2.chr18.ver2.1.g474920.t01	VITMroTrayshed_v2.1.hap1.chr18	30213249	30214956	+	TIR-NBS	manual	439	TIR	PF01582.21	176	3.7e-43	92.0455	34	203
VITMroTrayshed_v2.0.hap2.chr18.ver2.1.g474920.t01	VITMroTrayshed_v2.1.hap1.chr18	30213249	30214956	+	TIR-NBS	manual	439	TIR_2	PF13676.7	121	2.2e-14	92.562	36	153
VITMroTrayshed_v2.0.hap2.chr18.ver2.1.g474920.t01	VITMroTrayshed_v2.1.hap1.chr18	30213249	30214956	+	TIR-NBS	manual	439	NB-ARC	PF00931.23	252	2.9e-29	86.1111	224	437
VITMroTrayshed_v2.0.hap2.chr18.ver2.0.g474980.t01	VITMroTrayshed_v2.1.hap1.chr18	30293430	30296521	-	TIR-NBS	.	776	TIR	PF01582.21	176	5.2e-51	89.7727	21	183
VITMroTrayshed_v2.0.hap2.chr18.ver2.0.g474980.t01	VITMroTrayshed_v2.1.hap1.chr18	30293430	30296521	-	TIR-NBS	.	776	TIR_2	PF13676.7	121	2.6e-13	80.9917	23	119
VITMroTrayshed_v2.0.hap2.chr18.ver2.0.g474980.t01	VITMroTrayshed_v2.1.hap1.chr18	30293430	30296521	-	TIR-NBS	.	776	NB-ARC	PF00931.23	252	5.7e-15	63.4921	199	351
VITMroTrayshed_v2.0.hap2.chr18.ver2.0.g474990.t01	VITMroTrayshed_v2.1.hap1.chr18	30298017	30307610	-	TIR-NBS	.	776	TIR	PF01582.21	176	5.3e-53	92.6136	22	188
VITMroTrayshed_v2.0.hap2.chr18.ver2.0.g474990.t01	VITMroTrayshed_v2.1.hap1.chr18	30298017	30307610	-	TIR-NBS	.	776	TIR_2	PF13676.7	121	2.8e-13	87.6033	24	128
VITMroTrayshed_v2.0.hap2.chr18.ver2.0.g474990.t01	VITMroTrayshed_v2.1.hap1.chr18	30298017	30307610	-	TIR-NBS	.	776	NB-ARC	PF00931.23	252	3.4e-14	63.0952	198	349
VITMroTrayshed_v2.0.hap1.chr18.ver2.1.g234570.t01	VITMroTrayshed_v2.1.hap1.chr18	30437087	30441432	+	TIR-NBS-LRR	manual	1110	TIR	PF01582.21	176	4.2e-53	92.6136	19	188
VITMroTrayshed_v2.0.hap1.chr18.ver2.1.g234570.t01	VITMroTrayshed_v2.1.hap1.chr18	30437087	30441432	+	TIR-NBS-LRR	manual	1110	TIR_2	PF13676.7	121	6.5e-18	80.9917	22	118
VITMroTrayshed_v2.0.hap1.chr18.ver2.1.g234570.t01	VITMroTrayshed_v2.1.hap1.chr18	30437087	30441432	+	TIR-NBS-LRR	manual	1110	NB-ARC	PF00931.23	252	2.9e-25	86.5079	212	419
VITMroTrayshed_v2.0.hap1.chr18.ver2.1.g234570.t01	VITMroTrayshed_v2.1.hap1.chr18	30437087	30441432	+	TIR-NBS-LRR	manual	1110	LRR_3	PF07725.13	20	0.00097	100	626	645
VITMroTrayshed_v2.0.hap1.chr18.ver2.1.g234570.t01	VITMroTrayshed_v2.1.hap1.chr18	30437087	30441432	+	TIR-NBS-LRR	manual	1110	LRR_4	PF12799.8	43	0.4	95.3488	719	758
VITMroTrayshed_v2.0.hap1.chr18.ver2.1.g234570.t01	VITMroTrayshed_v2.1.hap1.chr18	30437087	30441432	+	TIR-NBS-LRR	manual	1110	LRR_8	PF13855.7	61	0.67	93.4426	744	799
VITMroTrayshed_v2.0.hap1.chr18.ver2.0.g234590.t01	VITMroTrayshed_v2.1.hap1.chr18	30467416	30471951	+	TIR-NBS-LRR	.	1187	TIR	PF01582.21	176	1.2e-51	98.8636	12	189
VITMroTrayshed_v2.0.hap1.chr18.ver2.0.g234590.t01	VITMroTrayshed_v2.1.hap1.chr18	30467416	30471951	+	TIR-NBS-LRR	.	1187	TIR_2	PF13676.7	121	2.4e-13	80.1653	15	110
VITMroTrayshed_v2.0.hap1.chr18.ver2.0.g234590.t01	VITMroTrayshed_v2.1.hap1.chr18	30467416	30471951	+	TIR-NBS-LRR	.	1187	NB-ARC	PF00931.23	252	7.7e-29	84.127	204	405
VITMroTrayshed_v2.0.hap1.chr18.ver2.0.g234590.t01	VITMroTrayshed_v2.1.hap1.chr18	30467416	30471951	+	TIR-NBS-LRR	.	1187	LRR_3	PF07725.13	20	7.6e-06	95	610	628
VITMroTrayshed_v2.0.hap1.chr18.ver2.0.g234590.t01	VITMroTrayshed_v2.1.hap1.chr18	30467416	30471951	+	TIR-NBS-LRR	.	1187	LRR_4	PF12799.8	43	0.0043	79.0698	857	894
VITMroTrayshed_v2.0.hap1.chr18.ver2.0.g234590.t01	VITMroTrayshed_v2.1.hap1.chr18	30467416	30471951	+	TIR-NBS-LRR	.	1187	LRR_8	PF13855.7	61	0.00029	96.7213	857	916
VITMroTrayshed_v2.0.hap1.chr18.ver2.0.g234590.t01	VITMroTrayshed_v2.1.hap1.chr18	30467416	30471951	+	TIR-NBS-LRR	.	1187	LRR_4	PF12799.8	43	0.15	86.0465	882	921
VITMroTrayshed_v2.0.hap1.chr18.ver2.0.g234590.t02	VITMroTrayshed_v2.1.hap1.chr18	30467416	30471951	+	TIR-NBS-LRR	.	1187	TIR	PF01582.21	176	1.2e-51	98.8636	12	189
VITMroTrayshed_v2.0.hap1.chr18.ver2.0.g234590.t02	VITMroTrayshed_v2.1.hap1.chr18	30467416	30471951	+	TIR-NBS-LRR	.	1187	TIR_2	PF13676.7	121	2.4e-13	80.1653	15	110
VITMroTrayshed_v2.0.hap1.chr18.ver2.0.g234590.t02	VITMroTrayshed_v2.1.hap1.chr18	30467416	30471951	+	TIR-NBS-LRR	.	1187	NB-ARC	PF00931.23	252	7.7e-29	84.127	204	405
VITMroTrayshed_v2.0.hap1.chr18.ver2.0.g234590.t02	VITMroTrayshed_v2.1.hap1.chr18	30467416	30471951	+	TIR-NBS-LRR	.	1187	LRR_3	PF07725.13	20	7.6e-06	95	610	628
VITMroTrayshed_v2.0.hap1.chr18.ver2.0.g234590.t02	VITMroTrayshed_v2.1.hap1.chr18	30467416	30471951	+	TIR-NBS-LRR	.	1187	LRR_4	PF12799.8	43	0.0043	79.0698	857	894
VITMroTrayshed_v2.0.hap1.chr18.ver2.0.g234590.t02	VITMroTrayshed_v2.1.hap1.chr18	30467416	30471951	+	TIR-NBS-LRR	.	1187	LRR_8	PF13855.7	61	0.00029	96.7213	857	916
VITMroTrayshed_v2.0.hap1.chr18.ver2.0.g234590.t02	VITMroTrayshed_v2.1.hap1.chr18	30467416	30471951	+	TIR-NBS-LRR	.	1187	LRR_4	PF12799.8	43	0.15	86.0465	882	921
VITMroTrayshed_v2.0.hap1.chr18.ver2.1.g234592.t01	VITMroTrayshed_v2.1.hap1.chr18	30492424	30493452	+	NBS	manual	342	NB-ARC	PF00931.23	252	1.4e-24	82.5397	1	199
VITMroTrayshed_v2.0.hap1.chr18.ver2.1.g234593.t01	VITMroTrayshed_v2.1.hap1.chr18	30510778	30517335	-	TIR-NBS-LRR	manual	1091	TIR	PF01582.21	176	2.8e-42	99.4318	16	202
VITMroTrayshed_v2.0.hap1.chr18.ver2.1.g234593.t01	VITMroTrayshed_v2.1.hap1.chr18	30510778	30517335	-	TIR-NBS-LRR	manual	1091	TIR_2	PF13676.7	121	1.7e-14	80.9917	19	114
VITMroTrayshed_v2.0.hap1.chr18.ver2.1.g234593.t01	VITMroTrayshed_v2.1.hap1.chr18	30510778	30517335	-	TIR-NBS-LRR	manual	1091	NB-ARC	PF00931.23	252	3.5e-25	85.7143	216	418
VITMroTrayshed_v2.0.hap1.chr18.ver2.1.g234593.t01	VITMroTrayshed_v2.1.hap1.chr18	30510778	30517335	-	TIR-NBS-LRR	manual	1091	LRR_8	PF13855.7	61	0.31	95.082	660	716
VITMroTrayshed_v2.0.hap1.chr18.ver2.1.g234594.t01	VITMroTrayshed_v2.1.hap1.chr18	30522471	30529039	+	TIR-NBS-LRR	manual	1693	TIR	PF01582.21	176	8.8e-53	96.0227	33	205
VITMroTrayshed_v2.0.hap1.chr18.ver2.1.g234594.t01	VITMroTrayshed_v2.1.hap1.chr18	30522471	30529039	+	TIR-NBS-LRR	manual	1693	TIR_2	PF13676.7	121	2.6e-17	80.9917	36	132
VITMroTrayshed_v2.0.hap1.chr18.ver2.1.g234594.t01	VITMroTrayshed_v2.1.hap1.chr18	30522471	30529039	+	TIR-NBS-LRR	manual	1693	NB-ARC	PF00931.23	252	2.6e-22	90.873	225	451
VITMroTrayshed_v2.0.hap1.chr18.ver2.1.g234594.t01	VITMroTrayshed_v2.1.hap1.chr18	30522471	30529039	+	TIR-NBS-LRR	manual	1693	LRR_3	PF07725.13	20	0.003	100	625	644
VITMroTrayshed_v2.0.hap1.chr18.ver2.1.g234594.t01	VITMroTrayshed_v2.1.hap1.chr18	30522471	30529039	+	TIR-NBS-LRR	manual	1693	LRR_8	PF13855.7	61	0.63	96.7213	670	727
VITMroTrayshed_v2.0.hap1.chr18.ver2.1.g234594.t01	VITMroTrayshed_v2.1.hap1.chr18	30522471	30529039	+	TIR-NBS-LRR	manual	1693	LRR_8	PF13855.7	61	0.037	93.4426	743	798
VITMroTrayshed_v2.0.hap1.chr18.ver2.1.g234594.t01	VITMroTrayshed_v2.1.hap1.chr18	30522471	30529039	+	TIR-NBS-LRR	manual	1693	LRR_4	PF12799.8	43	0.097	83.7209	764	799
VITMroTrayshed_v2.0.hap1.chr18.ver2.1.g234594.t01	VITMroTrayshed_v2.1.hap1.chr18	30522471	30529039	+	TIR-NBS-LRR	manual	1693	LRR_8	PF13855.7	61	0.13	96.7213	867	924
VITMroTrayshed_v2.0.hap1.chr18.ver2.1.g234594.t01	VITMroTrayshed_v2.1.hap1.chr18	30522471	30529039	+	TIR-NBS-LRR	manual	1693	LRR_8	PF13855.7	61	0.002	96.7213	890	947
VITMroTrayshed_v2.0.hap1.chr18.ver2.1.g234594.t01	VITMroTrayshed_v2.1.hap1.chr18	30522471	30529039	+	TIR-NBS-LRR	manual	1693	LRR_4	PF12799.8	43	0.35	83.7209	913	948
VITMroTrayshed_v2.0.hap1.chr18.ver2.1.g234594.t01	VITMroTrayshed_v2.1.hap1.chr18	30522471	30529039	+	TIR-NBS-LRR	manual	1693	LRR_8	PF13855.7	61	0.02	96.7213	1016	1073
VITMroTrayshed_v2.0.hap1.chr18.ver2.1.g234594.t01	VITMroTrayshed_v2.1.hap1.chr18	30522471	30529039	+	TIR-NBS-LRR	manual	1693	LRR_4	PF12799.8	43	0.46	81.3953	1040	1074
VITMroTrayshed_v2.0.hap1.chr18.ver2.1.g234594.t01	VITMroTrayshed_v2.1.hap1.chr18	30522471	30529039	+	TIR-NBS-LRR	manual	1693	LRR_4	PF12799.8	43	0.36	95.3488	1142	1181
VITMroTrayshed_v2.0.hap1.chr18.ver2.1.g234594.t01	VITMroTrayshed_v2.1.hap1.chr18	30522471	30529039	+	TIR-NBS-LRR	manual	1693	LRR_8	PF13855.7	61	0.0041	93.4426	1167	1222
VITMroTrayshed_v2.0.hap1.chr18.ver2.1.g234594.t01	VITMroTrayshed_v2.1.hap1.chr18	30522471	30529039	+	TIR-NBS-LRR	manual	1693	LRR_4	PF12799.8	43	0.018	86.0465	1188	1224
VITMroTrayshed_v2.0.hap1.chr18.ver2.1.g234594.t01	VITMroTrayshed_v2.1.hap1.chr18	30522471	30529039	+	TIR-NBS-LRR	manual	1693	LRR_4	PF12799.8	43	0.023	90.6977	1314	1354
VITMroTrayshed_v2.0.hap1.chr18.ver2.1.g234594.t01	VITMroTrayshed_v2.1.hap1.chr18	30522471	30529039	+	TIR-NBS-LRR	manual	1693	LRR_8	PF13855.7	61	0.49	96.7213	1338	1396
VITMroTrayshed_v2.0.hap1.chr18.ver2.1.g234600.t01	VITMroTrayshed_v2.1.hap1.chr18	30550522	30553481	+	TIR-NBS	manual	627	TIR	PF01582.21	176	2.7e-52	94.3182	37	208
VITMroTrayshed_v2.0.hap1.chr18.ver2.1.g234600.t01	VITMroTrayshed_v2.1.hap1.chr18	30550522	30553481	+	TIR-NBS	manual	627	TIR_2	PF13676.7	121	2.5e-18	80.9917	40	136
VITMroTrayshed_v2.0.hap1.chr18.ver2.1.g234600.t01	VITMroTrayshed_v2.1.hap1.chr18	30550522	30553481	+	TIR-NBS	manual	627	NB-ARC	PF00931.23	252	7.9e-24	92.0635	226	455
VITMroTrayshed_v2.0.hap1.chr18.ver2.1.g234603.t01	VITMroTrayshed_v2.1.hap1.chr18	30569188	30571238	+	TIR-NBS	manual	574	TIR	PF01582.21	176	7e-57	99.4318	13	191
VITMroTrayshed_v2.0.hap1.chr18.ver2.1.g234603.t01	VITMroTrayshed_v2.1.hap1.chr18	30569188	30571238	+	TIR-NBS	manual	574	TIR_2	PF13676.7	121	2e-14	80.9917	16	112
VITMroTrayshed_v2.0.hap1.chr18.ver2.1.g234603.t01	VITMroTrayshed_v2.1.hap1.chr18	30569188	30571238	+	TIR-NBS	manual	574	NB-ARC	PF00931.23	252	9.7e-25	87.6984	196	404
VITMroTrayshed_v2.0.hap1.chr18.ver2.1.g234671.t01	VITMroTrayshed_v2.1.hap1.chr18	30649335	30653223	-	TIR-NBS-LRR	manual	1105	TIR	PF01582.21	176	3.9e-51	99.4318	17	195
VITMroTrayshed_v2.0.hap1.chr18.ver2.1.g234671.t01	VITMroTrayshed_v2.1.hap1.chr18	30649335	30653223	-	TIR-NBS-LRR	manual	1105	TIR_2	PF13676.7	121	1e-15	80.9917	19	115
VITMroTrayshed_v2.0.hap1.chr18.ver2.1.g234671.t01	VITMroTrayshed_v2.1.hap1.chr18	30649335	30653223	-	TIR-NBS-LRR	manual	1105	NB-ARC	PF00931.23	252	4.6e-30	90.873	196	415
VITMroTrayshed_v2.0.hap1.chr18.ver2.1.g234671.t01	VITMroTrayshed_v2.1.hap1.chr18	30649335	30653223	-	TIR-NBS-LRR	manual	1105	LRR_3	PF07725.13	20	1.3e-06	100	610	629
VITMroTrayshed_v2.0.hap1.chr18.ver2.1.g234671.t01	VITMroTrayshed_v2.1.hap1.chr18	30649335	30653223	-	TIR-NBS-LRR	manual	1105	LRR_8	PF13855.7	61	0.0016	95.082	790	847
VITMroTrayshed_v2.0.hap1.chr18.ver2.1.g234671.t01	VITMroTrayshed_v2.1.hap1.chr18	30649335	30653223	-	TIR-NBS-LRR	manual	1105	LRR_4	PF12799.8	43	0.58	95.3488	815	857
VITMroTrayshed_v2.0.hap1.chr18.ver2.1.g234691.t01	VITMroTrayshed_v2.1.hap1.chr18	30677624	30682356	+	TIR-NBS-LRR	manual	850	TIR	PF01582.21	176	7.6e-49	92.6136	36	205
VITMroTrayshed_v2.0.hap1.chr18.ver2.1.g234691.t01	VITMroTrayshed_v2.1.hap1.chr18	30677624	30682356	+	TIR-NBS-LRR	manual	850	TIR_2	PF13676.7	121	7.4e-15	76.8595	39	133
VITMroTrayshed_v2.0.hap1.chr18.ver2.1.g234691.t01	VITMroTrayshed_v2.1.hap1.chr18	30677624	30682356	+	TIR-NBS-LRR	manual	850	TIR	PF01582.21	176	1.5e-34	88.6364	235	397
VITMroTrayshed_v2.0.hap1.chr18.ver2.1.g234691.t01	VITMroTrayshed_v2.1.hap1.chr18	30677624	30682356	+	TIR-NBS-LRR	manual	850	TIR_2	PF13676.7	121	2.2e-13	76.8595	237	330
VITMroTrayshed_v2.0.hap1.chr18.ver2.1.g234691.t01	VITMroTrayshed_v2.1.hap1.chr18	30677624	30682356	+	TIR-NBS-LRR	manual	850	NB-ARC	PF00931.23	252	1.3e-26	94.4444	423	653
VITMroTrayshed_v2.0.hap1.chr18.ver2.1.g234691.t01	VITMroTrayshed_v2.1.hap1.chr18	30677624	30682356	+	TIR-NBS-LRR	manual	850	LRR_3	PF07725.13	20	0.0034	90	832	849
VITMroTrayshed_v2.0.hap1.chr18.ver2.1.g234701.t01	VITMroTrayshed_v2.1.hap1.chr18	30750163	30751872	-	TIR-NBS	manual	398	TIR	PF01582.21	176	1.2e-50	98.8636	15	191
VITMroTrayshed_v2.0.hap1.chr18.ver2.1.g234701.t01	VITMroTrayshed_v2.1.hap1.chr18	30750163	30751872	-	TIR-NBS	manual	398	TIR_2	PF13676.7	121	3.2e-13	80.9917	17	113
VITMroTrayshed_v2.0.hap1.chr18.ver2.1.g234701.t01	VITMroTrayshed_v2.1.hap1.chr18	30750163	30751872	-	TIR-NBS	manual	398	NB-ARC	PF00931.23	252	5.4e-18	75.7937	207	388
VITMroTrayshed_v2.0.hap1.chr18.ver2.1.g234731.t01	VITMroTrayshed_v2.1.hap1.chr18	30795921	30797134	-	TIR-NBS	manual	349	TIR	PF01582.21	176	4.2e-49	98.2955	9	182
VITMroTrayshed_v2.0.hap1.chr18.ver2.1.g234731.t01	VITMroTrayshed_v2.1.hap1.chr18	30795921	30797134	-	TIR-NBS	manual	349	TIR_2	PF13676.7	121	4.4e-15	80.9917	11	106
VITMroTrayshed_v2.0.hap1.chr18.ver2.1.g234731.t01	VITMroTrayshed_v2.1.hap1.chr18	30795921	30797134	-	TIR-NBS	manual	349	NB-ARC	PF00931.23	252	1.5e-19	68.254	185	349
VITMroTrayshed_v2.0.hap1.chr18.ver2.1.g234740.t01	VITMroTrayshed_v2.1.hap1.chr18	30806299	30810147	-	TIR-NBS-LRR	manual	1095	TIR	PF01582.21	176	4.1e-49	97.7273	13	187
VITMroTrayshed_v2.0.hap1.chr18.ver2.1.g234740.t01	VITMroTrayshed_v2.1.hap1.chr18	30806299	30810147	-	TIR-NBS-LRR	manual	1095	TIR_2	PF13676.7	121	1.2e-15	80.9917	15	111
VITMroTrayshed_v2.0.hap1.chr18.ver2.1.g234740.t01	VITMroTrayshed_v2.1.hap1.chr18	30806299	30810147	-	TIR-NBS-LRR	manual	1095	NB-ARC	PF00931.23	252	1.8e-28	90.873	191	410
VITMroTrayshed_v2.0.hap1.chr18.ver2.1.g234740.t01	VITMroTrayshed_v2.1.hap1.chr18	30806299	30810147	-	TIR-NBS-LRR	manual	1095	LRR_3	PF07725.13	20	5.2e-08	100	605	624
VITMroTrayshed_v2.0.hap1.chr18.ver2.1.g234740.t01	VITMroTrayshed_v2.1.hap1.chr18	30806299	30810147	-	TIR-NBS-LRR	manual	1095	LRR_8	PF13855.7	61	0.00044	95.082	786	843
VITMroTrayshed_v2.0.hap1.chr18.ver2.1.g234740.t01	VITMroTrayshed_v2.1.hap1.chr18	30806299	30810147	-	TIR-NBS-LRR	manual	1095	LRR_4	PF12799.8	43	0.6	95.3488	811	853
VITMroTrayshed_v2.0.hap1.chr18.ver2.1.g234760.t01	VITMroTrayshed_v2.1.hap1.chr18	30852770	30857046	+	TIR-NBS-LRR	manual	1105	TIR	PF01582.21	176	4.2e-51	99.4318	12	190
VITMroTrayshed_v2.0.hap1.chr18.ver2.1.g234760.t01	VITMroTrayshed_v2.1.hap1.chr18	30852770	30857046	+	TIR-NBS-LRR	manual	1105	TIR_2	PF13676.7	121	4e-15	80.9917	14	110
VITMroTrayshed_v2.0.hap1.chr18.ver2.1.g234760.t01	VITMroTrayshed_v2.1.hap1.chr18	30852770	30857046	+	TIR-NBS-LRR	manual	1105	NB-ARC	PF00931.23	252	4.2e-25	91.6667	194	414
VITMroTrayshed_v2.0.hap1.chr18.ver2.1.g234760.t01	VITMroTrayshed_v2.1.hap1.chr18	30852770	30857046	+	TIR-NBS-LRR	manual	1105	LRR_3	PF07725.13	20	4.4e-06	100	610	629
VITMroTrayshed_v2.0.hap1.chr18.ver2.1.g234760.t01	VITMroTrayshed_v2.1.hap1.chr18	30852770	30857046	+	TIR-NBS-LRR	manual	1105	LRR_4	PF12799.8	43	0.18	86.0465	680	719
VITMroTrayshed_v2.0.hap1.chr18.ver2.1.g234760.t01	VITMroTrayshed_v2.1.hap1.chr18	30852770	30857046	+	TIR-NBS-LRR	manual	1105	LRR_8	PF13855.7	61	0.28	96.7213	790	848
VITMroTrayshed_v2.0.hap1.chr18.ver2.1.g234760.t01	VITMroTrayshed_v2.1.hap1.chr18	30852770	30857046	+	TIR-NBS-LRR	manual	1105	LRR_4	PF12799.8	43	0.21	88.3721	815	853
VITMroTrayshed_v2.0.hap1.chr18.ver2.1.g234770.t01	VITMroTrayshed_v2.1.hap1.chr18	30865944	30869933	+	TIR-NBS-LRR	manual	1094	TIR	PF01582.21	176	4.2e-51	99.4318	12	190
VITMroTrayshed_v2.0.hap1.chr18.ver2.1.g234770.t01	VITMroTrayshed_v2.1.hap1.chr18	30865944	30869933	+	TIR-NBS-LRR	manual	1094	TIR_2	PF13676.7	121	4e-15	80.9917	14	110
VITMroTrayshed_v2.0.hap1.chr18.ver2.1.g234770.t01	VITMroTrayshed_v2.1.hap1.chr18	30865944	30869933	+	TIR-NBS-LRR	manual	1094	NB-ARC	PF00931.23	252	1.2e-26	86.9048	205	412
VITMroTrayshed_v2.0.hap1.chr18.ver2.1.g234770.t01	VITMroTrayshed_v2.1.hap1.chr18	30865944	30869933	+	TIR-NBS-LRR	manual	1094	LRR_3	PF07725.13	20	0.00057	95	613	631
VITMroTrayshed_v2.0.hap1.chr18.ver2.1.g234770.t01	VITMroTrayshed_v2.1.hap1.chr18	30865944	30869933	+	TIR-NBS-LRR	manual	1094	LRR_8	PF13855.7	61	0.41	95.082	613	667
VITMroTrayshed_v2.0.hap1.chr18.ver2.1.g234770.t01	VITMroTrayshed_v2.1.hap1.chr18	30865944	30869933	+	TIR-NBS-LRR	manual	1094	LRR_8	PF13855.7	61	0.0012	96.7213	705	762
VITMroTrayshed_v2.0.hap1.chr18.ver2.1.g234770.t01	VITMroTrayshed_v2.1.hap1.chr18	30865944	30869933	+	TIR-NBS-LRR	manual	1094	LRR_4	PF12799.8	43	0.033	86.0465	706	744
VITMroTrayshed_v2.0.hap1.chr18.ver2.1.g234770.t01	VITMroTrayshed_v2.1.hap1.chr18	30865944	30869933	+	TIR-NBS-LRR	manual	1094	LRR_4	PF12799.8	43	0.23	95.3488	753	793
VITMroTrayshed_v2.0.hap1.chr18.ver2.1.g234770.t01	VITMroTrayshed_v2.1.hap1.chr18	30865944	30869933	+	TIR-NBS-LRR	manual	1094	LRR_4	PF12799.8	43	0.0087	83.7209	778	815
VITMroTrayshed_v2.0.hap1.chr18.ver2.1.g234770.t01	VITMroTrayshed_v2.1.hap1.chr18	30865944	30869933	+	TIR-NBS-LRR	manual	1094	LRR_8	PF13855.7	61	0.00042	95.082	778	834
VITMroTrayshed_v2.0.hap1.chr18.ver2.1.g234770.t01	VITMroTrayshed_v2.1.hap1.chr18	30865944	30869933	+	TIR-NBS-LRR	manual	1094	LRR_4	PF12799.8	43	0.35	88.3721	801	841
VITMroTrayshed_v2.0.hap1.chr18.ver2.1.g234770.t01	VITMroTrayshed_v2.1.hap1.chr18	30865944	30869933	+	TIR-NBS-LRR	manual	1094	LRR_4	PF12799.8	43	0.096	79.0698	849	881
VITMroTrayshed_v2.0.hap1.chr18.ver2.1.g234770.t01	VITMroTrayshed_v2.1.hap1.chr18	30865944	30869933	+	TIR-NBS-LRR	manual	1094	LRR_4	PF12799.8	43	0.14	79.0698	894	930
VITMroTrayshed_v2.0.hap1.chr18.ver2.1.g234770.t01	VITMroTrayshed_v2.1.hap1.chr18	30865944	30869933	+	TIR-NBS-LRR	manual	1094	LRR_8	PF13855.7	61	0.002	96.7213	919	977
VITMroTrayshed_v2.0.hap1.chr18.ver2.1.g234770.t01	VITMroTrayshed_v2.1.hap1.chr18	30865944	30869933	+	TIR-NBS-LRR	manual	1094	LRR_4	PF12799.8	43	0.003	95.3488	944	986
VITMroTrayshed_v2.0.hap1.chr18.ver2.1.g234791.t01	VITMroTrayshed_v2.1.hap1.chr18	30887483	30888493	-	NBS	manual	336	NB-ARC	PF00931.23	252	3.6e-24	90.0794	29	246
VITMroTrayshed_v2.0.hap1.chr18.ver2.1.g234810.t01	VITMroTrayshed_v2.1.hap1.chr18	30926440	30931927	+	NBS-LRR	manual	1461	NB-ARC	PF00931.23	252	2.8e-25	84.5238	105	307
VITMroTrayshed_v2.0.hap1.chr18.ver2.1.g234810.t01	VITMroTrayshed_v2.1.hap1.chr18	30926440	30931927	+	NBS-LRR	manual	1461	LRR_3	PF07725.13	20	1.8e-07	100	510	529
VITMroTrayshed_v2.0.hap1.chr18.ver2.1.g234810.t01	VITMroTrayshed_v2.1.hap1.chr18	30926440	30931927	+	NBS-LRR	manual	1461	LRR_8	PF13855.7	61	0.005	93.4426	1330	1385
VITMroTrayshed_v2.0.hap1.chr18.ver2.1.g234810.t01	VITMroTrayshed_v2.1.hap1.chr18	30926440	30931927	+	NBS-LRR	manual	1461	LRR_4	PF12799.8	43	0.12	95.3488	1354	1395
VITMroTrayshed_v2.0.hap1.chr18.ver2.0.g235160.t01	VITMroTrayshed_v2.1.hap1.chr18	31647288	31678612	-	TIR-NBS-LRR	.	1026	TIR	PF01582.21	176	7.9e-43	89.7727	28	191
VITMroTrayshed_v2.0.hap1.chr18.ver2.0.g235160.t01	VITMroTrayshed_v2.1.hap1.chr18	31647288	31678612	-	TIR-NBS-LRR	.	1026	TIR_2	PF13676.7	121	3.9e-16	77.686	30	127
VITMroTrayshed_v2.0.hap1.chr18.ver2.0.g235160.t01	VITMroTrayshed_v2.1.hap1.chr18	31647288	31678612	-	TIR-NBS-LRR	.	1026	NB-ARC	PF00931.23	252	2.2e-23	88.0952	221	436
VITMroTrayshed_v2.0.hap1.chr18.ver2.0.g235160.t01	VITMroTrayshed_v2.1.hap1.chr18	31647288	31678612	-	TIR-NBS-LRR	.	1026	LRR_8	PF13855.7	61	0.021	90.1639	656	708
VITMroTrayshed_v2.0.hap1.chr18.ver2.0.g235160.t01	VITMroTrayshed_v2.1.hap1.chr18	31647288	31678612	-	TIR-NBS-LRR	.	1026	LRR_4	PF12799.8	43	0.0099	90.6977	675	715
VITMroTrayshed_v2.0.hap1.chr18.ver2.0.g235160.t01	VITMroTrayshed_v2.1.hap1.chr18	31647288	31678612	-	TIR-NBS-LRR	.	1026	LRR_4	PF12799.8	43	0.0019	93.0233	797	834
VITMroTrayshed_v2.0.hap1.chr18.ver2.0.g235160.t01	VITMroTrayshed_v2.1.hap1.chr18	31647288	31678612	-	TIR-NBS-LRR	.	1026	LRR_8	PF13855.7	61	4.4e-06	93.4426	797	851
VITMroTrayshed_v2.0.hap1.chr18.ver2.0.g235160.t02	VITMroTrayshed_v2.1.hap1.chr18	31647855	31678498	-	TIR-NBS-LRR	.	939	TIR	PF01582.21	176	6.9e-43	89.7727	28	191
VITMroTrayshed_v2.0.hap1.chr18.ver2.0.g235160.t02	VITMroTrayshed_v2.1.hap1.chr18	31647855	31678498	-	TIR-NBS-LRR	.	939	TIR_2	PF13676.7	121	3.5e-16	77.686	30	127
VITMroTrayshed_v2.0.hap1.chr18.ver2.0.g235160.t02	VITMroTrayshed_v2.1.hap1.chr18	31647855	31678498	-	TIR-NBS-LRR	.	939	NB-ARC	PF00931.23	252	1.9e-23	88.0952	221	436
VITMroTrayshed_v2.0.hap1.chr18.ver2.0.g235160.t02	VITMroTrayshed_v2.1.hap1.chr18	31647855	31678498	-	TIR-NBS-LRR	.	939	LRR_8	PF13855.7	61	0.018	90.1639	656	708
VITMroTrayshed_v2.0.hap1.chr18.ver2.0.g235160.t02	VITMroTrayshed_v2.1.hap1.chr18	31647855	31678498	-	TIR-NBS-LRR	.	939	LRR_4	PF12799.8	43	0.0089	90.6977	675	715
VITMroTrayshed_v2.0.hap1.chr18.ver2.0.g235160.t02	VITMroTrayshed_v2.1.hap1.chr18	31647855	31678498	-	TIR-NBS-LRR	.	939	LRR_8	PF13855.7	61	1	100	698	758
VITMroTrayshed_v2.0.hap1.chr18.ver2.0.g235160.t02	VITMroTrayshed_v2.1.hap1.chr18	31647855	31678498	-	TIR-NBS-LRR	.	939	LRR_4	PF12799.8	43	0.0015	93.0233	797	834
VITMroTrayshed_v2.0.hap1.chr18.ver2.0.g235160.t02	VITMroTrayshed_v2.1.hap1.chr18	31647855	31678498	-	TIR-NBS-LRR	.	939	LRR_8	PF13855.7	61	4e-06	93.4426	797	851
VITMroTrayshed_v2.0.hap1.chr18.ver2.0.g235160.t02	VITMroTrayshed_v2.1.hap1.chr18	31647855	31678498	-	TIR-NBS-LRR	.	939	LRR_4	PF12799.8	43	0.16	95.3488	819	861
VITMroTrayshed_v2.0.hap1.chr18.ver2.0.g235180.t01	VITMroTrayshed_v2.1.hap1.chr18	31685640	31689654	+	TIR-NBS-LRR	EVM	639	TIR	PF01582.21	176	2.7e-46	92.0455	13	182
VITMroTrayshed_v2.0.hap1.chr18.ver2.0.g235180.t01	VITMroTrayshed_v2.1.hap1.chr18	31685640	31689654	+	TIR-NBS-LRR	EVM	639	TIR_2	PF13676.7	121	3.7e-14	80.9917	16	112
VITMroTrayshed_v2.0.hap1.chr18.ver2.0.g235180.t01	VITMroTrayshed_v2.1.hap1.chr18	31685640	31689654	+	TIR-NBS-LRR	EVM	639	NB-ARC	PF00931.23	252	8.7e-20	87.3016	207	408
VITMroTrayshed_v2.0.hap1.chr18.ver2.0.g235180.t01	VITMroTrayshed_v2.1.hap1.chr18	31685640	31689654	+	TIR-NBS-LRR	EVM	639	LRR_3	PF07725.13	20	1	80	546	561
VITMroTrayshed_v2.0.hap1.chr18.ver2.1.g235201.t01	VITMroTrayshed_v2.1.hap1.chr18	31742987	31744684	-	NBS-LRR	manual	503	NB-ARC	PF00931.23	252	1.8e-22	92.0635	30	248
VITMroTrayshed_v2.0.hap1.chr18.ver2.1.g235201.t01	VITMroTrayshed_v2.1.hap1.chr18	31742987	31744684	-	NBS-LRR	manual	503	LRR_8	PF13855.7	61	0.18	57.377	456	489
VITMroTrayshed_v2.0.hap1.chr18.ver2.1.g235201.t01	VITMroTrayshed_v2.1.hap1.chr18	31742987	31744684	-	NBS-LRR	manual	503	LRR_4	PF12799.8	43	0.045	88.3721	457	496
VITMroTrayshed_v2.0.hap1.chr18.ver2.1.g235202.t01	VITMroTrayshed_v2.1.hap1.chr18	31749731	31750621	+	NBS	manual	296	NB-ARC	PF00931.23	252	4.3e-17	50.3968	80	203
VITMroTrayshed_v2.0.hap1.chr18.ver2.1.g235270.t01	VITMroTrayshed_v2.1.hap1.chr18	31857531	31860415	+	TIR-NBS-LRR	manual	781	TIR	PF01582.21	176	2.2e-48	93.1818	20	186
VITMroTrayshed_v2.0.hap1.chr18.ver2.1.g235270.t01	VITMroTrayshed_v2.1.hap1.chr18	31857531	31860415	+	TIR-NBS-LRR	manual	781	TIR_2	PF13676.7	121	6.8e-13	80.9917	23	118
VITMroTrayshed_v2.0.hap1.chr18.ver2.1.g235270.t01	VITMroTrayshed_v2.1.hap1.chr18	31857531	31860415	+	TIR-NBS-LRR	manual	781	NB-ARC	PF00931.23	252	8.8e-26	88.0952	205	420
VITMroTrayshed_v2.0.hap1.chr18.ver2.1.g235270.t01	VITMroTrayshed_v2.1.hap1.chr18	31857531	31860415	+	TIR-NBS-LRR	manual	781	LRR_3	PF07725.13	20	2.9e-05	100	613	632
VITMroTrayshed_v2.0.hap1.chr18.ver2.1.g235270.t01	VITMroTrayshed_v2.1.hap1.chr18	31857531	31860415	+	TIR-NBS-LRR	manual	781	LRR_4	PF12799.8	43	0.15	79.0698	636	671
VITMroTrayshed_v2.0.hap1.chr18.ver2.1.g235270.t01	VITMroTrayshed_v2.1.hap1.chr18	31857531	31860415	+	TIR-NBS-LRR	manual	781	LRR_8	PF13855.7	61	0.22	63.9344	654	692
VITMroTrayshed_v2.0.hap1.chr18.ver2.1.g235270.t01	VITMroTrayshed_v2.1.hap1.chr18	31857531	31860415	+	TIR-NBS-LRR	manual	781	LRR_4	PF12799.8	43	0.0042	88.3721	682	720
VITMroTrayshed_v2.0.hap1.chr18.ver2.1.g235270.t01	VITMroTrayshed_v2.1.hap1.chr18	31857531	31860415	+	TIR-NBS-LRR	manual	781	LRR_8	PF13855.7	61	0.036	95.082	705	761
VITMroTrayshed_v2.0.hap1.chr18.ver2.1.g235270.t01	VITMroTrayshed_v2.1.hap1.chr18	31857531	31860415	+	TIR-NBS-LRR	manual	781	LRR_4	PF12799.8	43	0.089	90.6977	730	770
VITMroTrayshed_v2.0.hap1.chr18.ver2.1.g235270.t01	VITMroTrayshed_v2.1.hap1.chr18	31857531	31860415	+	TIR-NBS-LRR	manual	781	LRR_8	PF13855.7	61	0.25	54.0984	730	761
VITMroTrayshed_v2.0.hap1.chr18.ver2.1.g235400.t01	VITMroTrayshed_v2.1.hap1.chr18	31967343	31983539	-	NBS-LRR	manual	1901	NB-ARC	PF00931.23	252	4.4e-25	85.7143	59	270
VITMroTrayshed_v2.0.hap1.chr18.ver2.1.g235400.t01	VITMroTrayshed_v2.1.hap1.chr18	31967343	31983539	-	NBS-LRR	manual	1901	LRR_3	PF07725.13	20	0.11	90	458	475
VITMroTrayshed_v2.0.hap1.chr18.ver2.1.g235400.t01	VITMroTrayshed_v2.1.hap1.chr18	31967343	31983539	-	NBS-LRR	manual	1901	LRR_4	PF12799.8	43	1	90.6977	503	544
VITMroTrayshed_v2.0.hap1.chr18.ver2.1.g235400.t01	VITMroTrayshed_v2.1.hap1.chr18	31967343	31983539	-	NBS-LRR	manual	1901	LRR_4	PF12799.8	43	0.53	86.0465	719	750
VITMroTrayshed_v2.0.hap1.chr18.ver2.1.g235400.t01	VITMroTrayshed_v2.1.hap1.chr18	31967343	31983539	-	NBS-LRR	manual	1901	LRR_8	PF13855.7	61	0.017	70.4918	1044	1085
VITMroTrayshed_v2.0.hap1.chr18.ver2.1.g235400.t01	VITMroTrayshed_v2.1.hap1.chr18	31967343	31983539	-	NBS-LRR	manual	1901	LRR_4	PF12799.8	43	0.0063	86.0465	1053	1091
VITMroTrayshed_v2.0.hap1.chr18.ver2.1.g235400.t01	VITMroTrayshed_v2.1.hap1.chr18	31967343	31983539	-	NBS-LRR	manual	1901	LRR_4	PF12799.8	43	0.8	81.3953	1483	1520
VITMroTrayshed_v2.0.hap1.chr18.ver2.1.g235400.t01	VITMroTrayshed_v2.1.hap1.chr18	31967343	31983539	-	NBS-LRR	manual	1901	LRR_8	PF13855.7	61	0.0053	68.8525	1519	1559
VITMroTrayshed_v2.0.hap1.chr18.ver2.1.g235400.t01	VITMroTrayshed_v2.1.hap1.chr18	31967343	31983539	-	NBS-LRR	manual	1901	LRR_4	PF12799.8	43	0.021	86.0465	1527	1565
VITMroTrayshed_v2.0.hap1.chr18.ver2.1.g235400.t01	VITMroTrayshed_v2.1.hap1.chr18	31967343	31983539	-	NBS-LRR	manual	1901	LRR_4	PF12799.8	43	0.066	88.3721	1550	1590
VITMroTrayshed_v2.0.hap1.chr18.ver2.1.g235400.t01	VITMroTrayshed_v2.1.hap1.chr18	31967343	31983539	-	NBS-LRR	manual	1901	LRR_4	PF12799.8	43	0.51	88.3721	1626	1663
VITMroTrayshed_v2.0.hap1.chr18.ver2.1.g235401.t01	VITMroTrayshed_v2.1.hap1.chr18	31987910	32007547	-	TIR-NBS-LRR	manual	1432	TIR	PF01582.21	176	7.5e-51	87.5	21	182
VITMroTrayshed_v2.0.hap1.chr18.ver2.1.g235401.t01	VITMroTrayshed_v2.1.hap1.chr18	31987910	32007547	-	TIR-NBS-LRR	manual	1432	TIR_2	PF13676.7	121	2e-16	80.9917	23	119
VITMroTrayshed_v2.0.hap1.chr18.ver2.1.g235401.t01	VITMroTrayshed_v2.1.hap1.chr18	31987910	32007547	-	TIR-NBS-LRR	manual	1432	NB-ARC	PF00931.23	252	2.9e-27	89.2857	204	425
VITMroTrayshed_v2.0.hap1.chr18.ver2.1.g235401.t01	VITMroTrayshed_v2.1.hap1.chr18	31987910	32007547	-	TIR-NBS-LRR	manual	1432	LRR_4	PF12799.8	43	0.013	86.0465	633	671
VITMroTrayshed_v2.0.hap1.chr18.ver2.1.g235401.t01	VITMroTrayshed_v2.1.hap1.chr18	31987910	32007547	-	TIR-NBS-LRR	manual	1432	LRR_4	PF12799.8	43	0.0011	93.0233	655	697
VITMroTrayshed_v2.0.hap1.chr18.ver2.1.g235401.t01	VITMroTrayshed_v2.1.hap1.chr18	31987910	32007547	-	TIR-NBS-LRR	manual	1432	LRR_4	PF12799.8	43	0.47	95.3488	704	743
VITMroTrayshed_v2.0.hap1.chr18.ver2.1.g235401.t01	VITMroTrayshed_v2.1.hap1.chr18	31987910	32007547	-	TIR-NBS-LRR	manual	1432	LRR_8	PF13855.7	61	0.33	95.082	704	760
VITMroTrayshed_v2.0.hap1.chr18.ver2.1.g235401.t01	VITMroTrayshed_v2.1.hap1.chr18	31987910	32007547	-	TIR-NBS-LRR	manual	1432	LRR_4	PF12799.8	43	0.59	86.0465	727	766
VITMroTrayshed_v2.0.hap1.chr18.ver2.1.g235401.t01	VITMroTrayshed_v2.1.hap1.chr18	31987910	32007547	-	TIR-NBS-LRR	manual	1432	LRR_4	PF12799.8	43	0.67	72.093	821	854
VITMroTrayshed_v2.0.hap1.chr18.ver2.1.g235401.t01	VITMroTrayshed_v2.1.hap1.chr18	31987910	32007547	-	TIR-NBS-LRR	manual	1432	LRR_8	PF13855.7	61	0.00021	93.4426	1187	1242
VITMroTrayshed_v2.0.hap1.chr18.ver2.1.g235401.t01	VITMroTrayshed_v2.1.hap1.chr18	31987910	32007547	-	TIR-NBS-LRR	manual	1432	LRR_4	PF12799.8	43	0.0006	86.0465	1210	1248
VITMroTrayshed_v2.0.hap1.chr18.ver2.1.g235401.t01	VITMroTrayshed_v2.1.hap1.chr18	31987910	32007547	-	TIR-NBS-LRR	manual	1432	LRR_4	PF12799.8	43	0.89	86.0465	1330	1369
VITMroTrayshed_v2.0.hap1.chr18.ver2.1.g235401.t01	VITMroTrayshed_v2.1.hap1.chr18	31987910	32007547	-	TIR-NBS-LRR	manual	1432	LRR_8	PF13855.7	61	0.0011	95.082	1331	1388
VITMroTrayshed_v2.0.hap1.chr18.ver2.1.g235511.t01	VITMroTrayshed_v2.1.hap1.chr18	32077317	32078789	+	NBS	manual	438	NB-ARC	PF00931.23	252	5.6e-28	85.3175	17	228
VITMroTrayshed_v2.0.hap1.chr18.ver2.0.g235550.t01	VITMroTrayshed_v2.1.hap1.chr18	32089261	32096495	+	TIR-NBS-LRR	.	1353	TIR	PF01582.21	176	2.1e-49	90.9091	20	184
VITMroTrayshed_v2.0.hap1.chr18.ver2.0.g235550.t01	VITMroTrayshed_v2.1.hap1.chr18	32089261	32096495	+	TIR-NBS-LRR	.	1353	TIR_2	PF13676.7	121	1.9e-13	80.9917	23	118
VITMroTrayshed_v2.0.hap1.chr18.ver2.0.g235550.t01	VITMroTrayshed_v2.1.hap1.chr18	32089261	32096495	+	TIR-NBS-LRR	.	1353	NB-ARC	PF00931.23	252	2e-27	88.8889	207	426
VITMroTrayshed_v2.0.hap1.chr18.ver2.0.g235550.t01	VITMroTrayshed_v2.1.hap1.chr18	32089261	32096495	+	TIR-NBS-LRR	.	1353	LRR_3	PF07725.13	20	0.12	100	619	638
VITMroTrayshed_v2.0.hap1.chr18.ver2.0.g235550.t01	VITMroTrayshed_v2.1.hap1.chr18	32089261	32096495	+	TIR-NBS-LRR	.	1353	LRR_4	PF12799.8	43	0.11	72.093	643	674
VITMroTrayshed_v2.0.hap1.chr18.ver2.0.g235550.t01	VITMroTrayshed_v2.1.hap1.chr18	32089261	32096495	+	TIR-NBS-LRR	.	1353	LRR_8	PF13855.7	61	0.31	73.7705	681	724
VITMroTrayshed_v2.0.hap1.chr18.ver2.0.g235550.t01	VITMroTrayshed_v2.1.hap1.chr18	32089261	32096495	+	TIR-NBS-LRR	.	1353	LRR_4	PF12799.8	43	0.067	88.3721	693	732
VITMroTrayshed_v2.0.hap1.chr18.ver2.0.g235550.t01	VITMroTrayshed_v2.1.hap1.chr18	32089261	32096495	+	TIR-NBS-LRR	.	1353	LRR_4	PF12799.8	43	0.041	88.3721	715	754
VITMroTrayshed_v2.0.hap1.chr18.ver2.0.g235550.t01	VITMroTrayshed_v2.1.hap1.chr18	32089261	32096495	+	TIR-NBS-LRR	.	1353	LRR_8	PF13855.7	61	0.00068	63.9344	736	773
VITMroTrayshed_v2.0.hap1.chr18.ver2.0.g235550.t01	VITMroTrayshed_v2.1.hap1.chr18	32089261	32096495	+	TIR-NBS-LRR	.	1353	LRR_4	PF12799.8	43	0.0071	86.0465	739	776
VITMroTrayshed_v2.0.hap1.chr18.ver2.0.g235550.t01	VITMroTrayshed_v2.1.hap1.chr18	32089261	32096495	+	TIR-NBS-LRR	.	1353	LRR_4	PF12799.8	43	0.015	86.0465	763	800
VITMroTrayshed_v2.0.hap1.chr18.ver2.0.g235550.t01	VITMroTrayshed_v2.1.hap1.chr18	32089261	32096495	+	TIR-NBS-LRR	.	1353	LRR_8	PF13855.7	61	1.3e-07	98.3607	785	842
VITMroTrayshed_v2.0.hap1.chr18.ver2.0.g235550.t01	VITMroTrayshed_v2.1.hap1.chr18	32089261	32096495	+	TIR-NBS-LRR	.	1353	LRR_4	PF12799.8	43	0.002	86.0465	809	846
VITMroTrayshed_v2.0.hap1.chr18.ver2.0.g235550.t01	VITMroTrayshed_v2.1.hap1.chr18	32089261	32096495	+	TIR-NBS-LRR	.	1353	LRR_8	PF13855.7	61	0.00057	88.5246	832	883
VITMroTrayshed_v2.0.hap1.chr18.ver2.0.g235550.t01	VITMroTrayshed_v2.1.hap1.chr18	32089261	32096495	+	TIR-NBS-LRR	.	1353	LRR_4	PF12799.8	43	0.04	90.6977	855	895
VITMroTrayshed_v2.0.hap1.chr18.ver2.0.g235550.t01	VITMroTrayshed_v2.1.hap1.chr18	32089261	32096495	+	TIR-NBS-LRR	.	1353	LRR_8	PF13855.7	61	0.014	65.5738	966	1004
VITMroTrayshed_v2.0.hap1.chr18.ver2.0.g235550.t01	VITMroTrayshed_v2.1.hap1.chr18	32089261	32096495	+	TIR-NBS-LRR	.	1353	LRR_4	PF12799.8	43	0.28	86.0465	972	1010
VITMroTrayshed_v2.0.hap1.chr18.ver2.0.g235550.t01	VITMroTrayshed_v2.1.hap1.chr18	32089261	32096495	+	TIR-NBS-LRR	.	1353	LRR_8	PF13855.7	61	0.0074	60.6557	1067	1102
VITMroTrayshed_v2.0.hap1.chr18.ver2.0.g235550.t01	VITMroTrayshed_v2.1.hap1.chr18	32089261	32096495	+	TIR-NBS-LRR	.	1353	LRR_4	PF12799.8	43	0.022	95.3488	1069	1111
VITMroTrayshed_v2.0.hap1.chr18.ver2.1.g235570.t01	VITMroTrayshed_v2.1.hap1.chr18	32115571	32124070	+	TIR-NBS-LRR	manual	1315	TIR	PF01582.21	176	4.7e-51	92.6136	20	187
VITMroTrayshed_v2.0.hap1.chr18.ver2.1.g235570.t01	VITMroTrayshed_v2.1.hap1.chr18	32115571	32124070	+	TIR-NBS-LRR	manual	1315	TIR_2	PF13676.7	121	3.3e-14	81.8182	23	119
VITMroTrayshed_v2.0.hap1.chr18.ver2.1.g235570.t01	VITMroTrayshed_v2.1.hap1.chr18	32115571	32124070	+	TIR-NBS-LRR	manual	1315	NB-ARC	PF00931.23	252	1.3e-27	90.0794	202	423
VITMroTrayshed_v2.0.hap1.chr18.ver2.1.g235570.t01	VITMroTrayshed_v2.1.hap1.chr18	32115571	32124070	+	TIR-NBS-LRR	manual	1315	LRR_3	PF07725.13	20	0.0019	90	609	626
VITMroTrayshed_v2.0.hap1.chr18.ver2.1.g235570.t01	VITMroTrayshed_v2.1.hap1.chr18	32115571	32124070	+	TIR-NBS-LRR	manual	1315	LRR_4	PF12799.8	43	0.029	93.0233	632	673
VITMroTrayshed_v2.0.hap1.chr18.ver2.1.g235570.t01	VITMroTrayshed_v2.1.hap1.chr18	32115571	32124070	+	TIR-NBS-LRR	manual	1315	LRR_8	PF13855.7	61	0.33	62.2951	676	712
VITMroTrayshed_v2.0.hap1.chr18.ver2.1.g235570.t01	VITMroTrayshed_v2.1.hap1.chr18	32115571	32124070	+	TIR-NBS-LRR	manual	1315	LRR_4	PF12799.8	43	0.12	86.0465	679	717
VITMroTrayshed_v2.0.hap1.chr18.ver2.1.g235570.t01	VITMroTrayshed_v2.1.hap1.chr18	32115571	32124070	+	TIR-NBS-LRR	manual	1315	LRR_8	PF13855.7	61	0.00018	59.0164	753	787
VITMroTrayshed_v2.0.hap1.chr18.ver2.1.g235570.t01	VITMroTrayshed_v2.1.hap1.chr18	32115571	32124070	+	TIR-NBS-LRR	manual	1315	LRR_4	PF12799.8	43	0.00052	95.3488	754	796
VITMroTrayshed_v2.0.hap1.chr18.ver2.1.g235570.t01	VITMroTrayshed_v2.1.hap1.chr18	32115571	32124070	+	TIR-NBS-LRR	manual	1315	LRR_4	PF12799.8	43	0.0063	86.0465	872	910
VITMroTrayshed_v2.0.hap1.chr18.ver2.1.g235570.t01	VITMroTrayshed_v2.1.hap1.chr18	32115571	32124070	+	TIR-NBS-LRR	manual	1315	LRR_8	PF13855.7	61	0.00013	95.082	872	928
VITMroTrayshed_v2.0.hap1.chr18.ver2.1.g235570.t01	VITMroTrayshed_v2.1.hap1.chr18	32115571	32124070	+	TIR-NBS-LRR	manual	1315	LRR_8	PF13855.7	61	0.24	60.6557	991	1026
VITMroTrayshed_v2.0.hap1.chr18.ver2.1.g235570.t01	VITMroTrayshed_v2.1.hap1.chr18	32115571	32124070	+	TIR-NBS-LRR	manual	1315	LRR_4	PF12799.8	43	0.24	95.3488	993	1035
VITMroTrayshed_v2.0.hap1.chr18.ver2.1.g235581.t01	VITMroTrayshed_v2.1.hap1.chr18	32264865	32269832	+	TIR-NBS	manual	477	TIR	PF01582.21	176	1.7e-47	78.9773	20	158
VITMroTrayshed_v2.0.hap1.chr18.ver2.1.g235581.t01	VITMroTrayshed_v2.1.hap1.chr18	32264865	32269832	+	TIR-NBS	manual	477	TIR_2	PF13676.7	121	5.4e-14	80.9917	23	118
VITMroTrayshed_v2.0.hap1.chr18.ver2.1.g235581.t01	VITMroTrayshed_v2.1.hap1.chr18	32264865	32269832	+	TIR-NBS	manual	477	NB-ARC	PF00931.23	252	4.9e-28	86.1111	171	383
VITMroTrayshed_v2.0.hap1.chr18.ver2.1.g235630.t01	VITMroTrayshed_v2.1.hap1.chr18	32292605	32299782	+	TIR-NBS-LRR	manual	1305	TIR	PF01582.21	176	2e-51	92.6136	20	188
VITMroTrayshed_v2.0.hap1.chr18.ver2.1.g235630.t01	VITMroTrayshed_v2.1.hap1.chr18	32292605	32299782	+	TIR-NBS-LRR	manual	1305	TIR_2	PF13676.7	121	2e-15	80.9917	23	119
VITMroTrayshed_v2.0.hap1.chr18.ver2.1.g235630.t01	VITMroTrayshed_v2.1.hap1.chr18	32292605	32299782	+	TIR-NBS-LRR	manual	1305	NB-ARC	PF00931.23	252	9.6e-28	90.0794	203	424
VITMroTrayshed_v2.0.hap1.chr18.ver2.1.g235630.t01	VITMroTrayshed_v2.1.hap1.chr18	32292605	32299782	+	TIR-NBS-LRR	manual	1305	LRR_3	PF07725.13	20	0.00034	90	610	627
VITMroTrayshed_v2.0.hap1.chr18.ver2.1.g235630.t01	VITMroTrayshed_v2.1.hap1.chr18	32292605	32299782	+	TIR-NBS-LRR	manual	1305	LRR_4	PF12799.8	43	0.9	83.7209	633	670
VITMroTrayshed_v2.0.hap1.chr18.ver2.1.g235630.t01	VITMroTrayshed_v2.1.hap1.chr18	32292605	32299782	+	TIR-NBS-LRR	manual	1305	LRR_8	PF13855.7	61	0.43	62.2951	677	713
VITMroTrayshed_v2.0.hap1.chr18.ver2.1.g235630.t01	VITMroTrayshed_v2.1.hap1.chr18	32292605	32299782	+	TIR-NBS-LRR	manual	1305	LRR_8	PF13855.7	61	0.25	63.9344	719	756
VITMroTrayshed_v2.0.hap1.chr18.ver2.1.g235630.t01	VITMroTrayshed_v2.1.hap1.chr18	32292605	32299782	+	TIR-NBS-LRR	manual	1305	LRR_8	PF13855.7	61	0.13	68.8525	767	806
VITMroTrayshed_v2.0.hap1.chr18.ver2.1.g235630.t01	VITMroTrayshed_v2.1.hap1.chr18	32292605	32299782	+	TIR-NBS-LRR	manual	1305	LRR_4	PF12799.8	43	0.94	95.3488	774	816
VITMroTrayshed_v2.0.hap1.chr18.ver2.1.g235630.t01	VITMroTrayshed_v2.1.hap1.chr18	32292605	32299782	+	TIR-NBS-LRR	manual	1305	LRR_4	PF12799.8	43	0.34	88.3721	820	859
VITMroTrayshed_v2.0.hap1.chr18.ver2.1.g235630.t01	VITMroTrayshed_v2.1.hap1.chr18	32292605	32299782	+	TIR-NBS-LRR	manual	1305	LRR_8	PF13855.7	61	0.00088	95.082	820	876
VITMroTrayshed_v2.0.hap1.chr18.ver2.1.g235630.t01	VITMroTrayshed_v2.1.hap1.chr18	32292605	32299782	+	TIR-NBS-LRR	manual	1305	LRR_4	PF12799.8	43	0.069	88.3721	842	882
VITMroTrayshed_v2.0.hap1.chr18.ver2.1.g235630.t01	VITMroTrayshed_v2.1.hap1.chr18	32292605	32299782	+	TIR-NBS-LRR	manual	1305	LRR_8	PF13855.7	61	0.47	60.6557	887	922
VITMroTrayshed_v2.0.hap1.chr18.ver2.1.g235630.t01	VITMroTrayshed_v2.1.hap1.chr18	32292605	32299782	+	TIR-NBS-LRR	manual	1305	LRR_4	PF12799.8	43	0.43	88.3721	963	1003
VITMroTrayshed_v2.0.hap1.chr18.ver2.1.g235630.t01	VITMroTrayshed_v2.1.hap1.chr18	32292605	32299782	+	TIR-NBS-LRR	manual	1305	LRR_4	PF12799.8	43	0.046	95.3488	988	1030
VITMroTrayshed_v2.0.hap1.chr18.ver2.1.g235640.t01	VITMroTrayshed_v2.1.hap1.chr18	32306716	32313526	+	NBS-LRR	manual	1167	NB-ARC	PF00931.23	252	7.7e-30	90.873	42	268
VITMroTrayshed_v2.0.hap1.chr18.ver2.1.g235640.t01	VITMroTrayshed_v2.1.hap1.chr18	32306716	32313526	+	NBS-LRR	manual	1167	LRR_3	PF07725.13	20	0.0017	90	451	468
VITMroTrayshed_v2.0.hap1.chr18.ver2.1.g235640.t01	VITMroTrayshed_v2.1.hap1.chr18	32306716	32313526	+	NBS-LRR	manual	1167	LRR_8	PF13855.7	61	0.18	62.2951	518	554
VITMroTrayshed_v2.0.hap1.chr18.ver2.1.g235640.t01	VITMroTrayshed_v2.1.hap1.chr18	32306716	32313526	+	NBS-LRR	manual	1167	LRR_4	PF12799.8	43	0.28	86.0465	521	559
VITMroTrayshed_v2.0.hap1.chr18.ver2.1.g235640.t01	VITMroTrayshed_v2.1.hap1.chr18	32306716	32313526	+	NBS-LRR	manual	1167	LRR_8	PF13855.7	61	0.024	68.8525	560	600
VITMroTrayshed_v2.0.hap1.chr18.ver2.1.g235640.t01	VITMroTrayshed_v2.1.hap1.chr18	32306716	32313526	+	NBS-LRR	manual	1167	LRR_8	PF13855.7	61	0.029	65.5738	610	647
VITMroTrayshed_v2.0.hap1.chr18.ver2.1.g235640.t01	VITMroTrayshed_v2.1.hap1.chr18	32306716	32313526	+	NBS-LRR	manual	1167	LRR_8	PF13855.7	61	0.0019	93.4426	662	717
VITMroTrayshed_v2.0.hap1.chr18.ver2.1.g235640.t01	VITMroTrayshed_v2.1.hap1.chr18	32306716	32313526	+	NBS-LRR	manual	1167	LRR_4	PF12799.8	43	0.01	86.0465	732	770
VITMroTrayshed_v2.0.hap1.chr18.ver2.1.g235640.t01	VITMroTrayshed_v2.1.hap1.chr18	32306716	32313526	+	NBS-LRR	manual	1167	LRR_8	PF13855.7	61	0.0039	95.082	732	788
VITMroTrayshed_v2.0.hap1.chr18.ver2.1.g235640.t01	VITMroTrayshed_v2.1.hap1.chr18	32306716	32313526	+	NBS-LRR	manual	1167	LRR_8	PF13855.7	61	0.28	93.4426	779	837
VITMroTrayshed_v2.0.hap1.chr18.ver2.1.g235640.t01	VITMroTrayshed_v2.1.hap1.chr18	32306716	32313526	+	NBS-LRR	manual	1167	LRR_4	PF12799.8	43	0.72	86.0465	804	840
VITMroTrayshed_v2.0.hap1.chr18.ver2.1.g235650.t01	VITMroTrayshed_v2.1.hap1.chr18	32318914	32326122	+	TIR-NBS-LRR	manual	1306	TIR	PF01582.21	176	2.4e-52	92.6136	20	186
VITMroTrayshed_v2.0.hap1.chr18.ver2.1.g235650.t01	VITMroTrayshed_v2.1.hap1.chr18	32318914	32326122	+	TIR-NBS-LRR	manual	1306	TIR_2	PF13676.7	121	5e-15	80.9917	23	118
VITMroTrayshed_v2.0.hap1.chr18.ver2.1.g235650.t01	VITMroTrayshed_v2.1.hap1.chr18	32318914	32326122	+	TIR-NBS-LRR	manual	1306	NB-ARC	PF00931.23	252	4.4e-30	92.4603	205	434
VITMroTrayshed_v2.0.hap1.chr18.ver2.1.g235650.t01	VITMroTrayshed_v2.1.hap1.chr18	32318914	32326122	+	TIR-NBS-LRR	manual	1306	LRR_3	PF07725.13	20	0.00034	90	613	630
VITMroTrayshed_v2.0.hap1.chr18.ver2.1.g235650.t01	VITMroTrayshed_v2.1.hap1.chr18	32318914	32326122	+	TIR-NBS-LRR	manual	1306	LRR_4	PF12799.8	43	0.13	86.0465	683	721
VITMroTrayshed_v2.0.hap1.chr18.ver2.1.g235650.t01	VITMroTrayshed_v2.1.hap1.chr18	32318914	32326122	+	TIR-NBS-LRR	manual	1306	LRR_8	PF13855.7	61	0.00058	96.7213	705	762
VITMroTrayshed_v2.0.hap1.chr18.ver2.1.g235650.t01	VITMroTrayshed_v2.1.hap1.chr18	32318914	32326122	+	TIR-NBS-LRR	manual	1306	LRR_8	PF13855.7	61	0.17	63.9344	773	809
VITMroTrayshed_v2.0.hap1.chr18.ver2.1.g235650.t01	VITMroTrayshed_v2.1.hap1.chr18	32318914	32326122	+	TIR-NBS-LRR	manual	1306	LRR_8	PF13855.7	61	0.02	95.082	823	879
VITMroTrayshed_v2.0.hap1.chr18.ver2.1.g235650.t01	VITMroTrayshed_v2.1.hap1.chr18	32318914	32326122	+	TIR-NBS-LRR	manual	1306	LRR_4	PF12799.8	43	0.33	86.0465	846	885
VITMroTrayshed_v2.0.hap1.chr18.ver2.1.g235650.t01	VITMroTrayshed_v2.1.hap1.chr18	32318914	32326122	+	TIR-NBS-LRR	manual	1306	LRR_4	PF12799.8	43	0.0045	86.0465	894	932
VITMroTrayshed_v2.0.hap1.chr18.ver2.1.g235650.t01	VITMroTrayshed_v2.1.hap1.chr18	32318914	32326122	+	TIR-NBS-LRR	manual	1306	LRR_8	PF13855.7	61	0.0012	95.082	894	950
VITMroTrayshed_v2.0.hap1.chr18.ver2.1.g235721.t01	VITMroTrayshed_v2.1.hap1.chr18	32491970	32497507	-	TIR-NBS-LRR	manual	587	TIR	PF01582.21	176	1.2e-45	80.1136	20	158
VITMroTrayshed_v2.0.hap1.chr18.ver2.1.g235721.t01	VITMroTrayshed_v2.1.hap1.chr18	32491970	32497507	-	TIR-NBS-LRR	manual	587	TIR_2	PF13676.7	121	3.7e-13	81.8182	22	118
VITMroTrayshed_v2.0.hap1.chr18.ver2.1.g235721.t01	VITMroTrayshed_v2.1.hap1.chr18	32491970	32497507	-	TIR-NBS-LRR	manual	587	NB-ARC	PF00931.23	252	4.3e-32	89.2857	162	382
VITMroTrayshed_v2.0.hap1.chr18.ver2.1.g235721.t01	VITMroTrayshed_v2.1.hap1.chr18	32491970	32497507	-	TIR-NBS-LRR	manual	587	LRR_3	PF07725.13	20	0.0099	100	567	586
VITMroTrayshed_v2.0.hap1.chr18.ver2.1.g235731.t01	VITMroTrayshed_v2.1.hap1.chr18	32514002	32517369	-	TIR-NBS	manual	536	TIR	PF01582.21	176	2.6e-48	90.9091	20	184
VITMroTrayshed_v2.0.hap1.chr18.ver2.1.g235731.t01	VITMroTrayshed_v2.1.hap1.chr18	32514002	32517369	-	TIR-NBS	manual	536	TIR_2	PF13676.7	121	8.6e-15	81.8182	22	118
VITMroTrayshed_v2.0.hap1.chr18.ver2.1.g235731.t01	VITMroTrayshed_v2.1.hap1.chr18	32514002	32517369	-	TIR-NBS	manual	536	NB-ARC	PF00931.23	252	1.1e-31	91.6667	210	435
VITMroTrayshed_v2.0.hap1.chr18.ver2.1.g235741.t01	VITMroTrayshed_v2.1.hap1.chr18	32570597	32575313	-	TIR-NBS-LRR	manual	666	TIR	PF01582.21	176	1.7e-44	91.4773	20	187
VITMroTrayshed_v2.0.hap1.chr18.ver2.1.g235741.t01	VITMroTrayshed_v2.1.hap1.chr18	32570597	32575313	-	TIR-NBS-LRR	manual	666	TIR_2	PF13676.7	121	4.1e-17	80.9917	23	119
VITMroTrayshed_v2.0.hap1.chr18.ver2.1.g235741.t01	VITMroTrayshed_v2.1.hap1.chr18	32570597	32575313	-	TIR-NBS-LRR	manual	666	NB-ARC	PF00931.23	252	3.4e-27	92.0635	210	437
VITMroTrayshed_v2.0.hap1.chr18.ver2.1.g235741.t01	VITMroTrayshed_v2.1.hap1.chr18	32570597	32575313	-	TIR-NBS-LRR	manual	666	LRR_3	PF07725.13	20	0.00067	95	607	625
VITMroTrayshed_v2.0.hap1.chr18.ver2.1.g235741.t01	VITMroTrayshed_v2.1.hap1.chr18	32570597	32575313	-	TIR-NBS-LRR	manual	666	LRR_8	PF13855.7	61	0.063	95.082	607	662
VITMroTrayshed_v2.0.hap1.chr18.ver2.1.g235761.t01	VITMroTrayshed_v2.1.hap1.chr18	32628573	32629832	-	NBS	manual	300	NB-ARC	PF00931.23	252	1e-31	88.4921	1	222
VITMroTrayshed_v2.0.hap1.chr18.ver2.1.g235762.t01	VITMroTrayshed_v2.1.hap1.chr18	32643264	32647809	-	TIR-NBS-LRR	manual	646	TIR	PF01582.21	176	3.6e-45	91.4773	20	187
VITMroTrayshed_v2.0.hap1.chr18.ver2.1.g235762.t01	VITMroTrayshed_v2.1.hap1.chr18	32643264	32647809	-	TIR-NBS-LRR	manual	646	TIR_2	PF13676.7	121	7.3e-18	80.9917	23	119
VITMroTrayshed_v2.0.hap1.chr18.ver2.1.g235762.t01	VITMroTrayshed_v2.1.hap1.chr18	32643264	32647809	-	TIR-NBS-LRR	manual	646	NB-ARC	PF00931.23	252	5.5e-30	92.0635	210	437
VITMroTrayshed_v2.0.hap1.chr18.ver2.1.g235762.t01	VITMroTrayshed_v2.1.hap1.chr18	32643264	32647809	-	TIR-NBS-LRR	manual	646	LRR_3	PF07725.13	20	0.97	90	619	636
VITMroTrayshed_v2.0.hap1.chr18.ver2.1.g235763.t01	VITMroTrayshed_v2.1.hap1.chr18	32663377	32664258	-	NBS	manual	293	NB-ARC	PF00931.23	252	1.5e-31	91.6667	47	275
VITMroTrayshed_v2.0.hap1.chr18.ver2.0.g234460.t01	VITMroTrayshed_v2.1.hap2.chr18	23101949	23105286	+	TIR-NBS-LRR	.	902	TIR	PF01582.21	176	5.1e-43	92.0455	34	203
VITMroTrayshed_v2.0.hap1.chr18.ver2.0.g234460.t01	VITMroTrayshed_v2.1.hap2.chr18	23101949	23105286	+	TIR-NBS-LRR	.	902	TIR_2	PF13676.7	121	7.1e-14	91.7355	36	152
VITMroTrayshed_v2.0.hap1.chr18.ver2.0.g234460.t01	VITMroTrayshed_v2.1.hap2.chr18	23101949	23105286	+	TIR-NBS-LRR	.	902	NB-ARC	PF00931.23	252	2.2e-29	89.2857	224	446
VITMroTrayshed_v2.0.hap1.chr18.ver2.0.g234460.t01	VITMroTrayshed_v2.1.hap2.chr18	23101949	23105286	+	TIR-NBS-LRR	.	902	LRR_3	PF07725.13	20	6.9e-06	100	632	651
VITMroTrayshed_v2.0.hap1.chr18.ver2.0.g234460.t01	VITMroTrayshed_v2.1.hap2.chr18	23101949	23105286	+	TIR-NBS-LRR	.	902	LRR_8	PF13855.7	61	0.098	91.8033	632	685
VITMroTrayshed_v2.0.hap1.chr18.ver2.0.g234460.t01	VITMroTrayshed_v2.1.hap2.chr18	23101949	23105286	+	TIR-NBS-LRR	.	902	LRR_4	PF12799.8	43	0.046	88.3721	655	694
VITMroTrayshed_v2.0.hap1.chr18.ver2.0.g234460.t01	VITMroTrayshed_v2.1.hap2.chr18	23101949	23105286	+	TIR-NBS-LRR	.	902	LRR_4	PF12799.8	43	0.017	97.6744	701	741
VITMroTrayshed_v2.0.hap1.chr18.ver2.0.g234460.t01	VITMroTrayshed_v2.1.hap2.chr18	23101949	23105286	+	TIR-NBS-LRR	.	902	LRR_8	PF13855.7	61	0.0001	95.082	702	758
VITMroTrayshed_v2.0.hap1.chr18.ver2.0.g234460.t01	VITMroTrayshed_v2.1.hap2.chr18	23101949	23105286	+	TIR-NBS-LRR	.	902	LRR_8	PF13855.7	61	0.41	67.2131	742	782
VITMroTrayshed_v2.0.hap1.chr18.ver2.0.g234460.t01	VITMroTrayshed_v2.1.hap2.chr18	23101949	23105286	+	TIR-NBS-LRR	.	902	LRR_4	PF12799.8	43	0.0057	90.6977	748	789
VITMroTrayshed_v2.0.hap1.chr18.ver2.0.g234460.t01	VITMroTrayshed_v2.1.hap2.chr18	23101949	23105286	+	TIR-NBS-LRR	.	902	LRR_8	PF13855.7	61	1.7e-05	93.4426	798	853
VITMroTrayshed_v2.0.hap1.chr18.ver2.0.g234460.t01	VITMroTrayshed_v2.1.hap2.chr18	23101949	23105286	+	TIR-NBS-LRR	.	902	LRR_4	PF12799.8	43	0.41	79.0698	800	835
VITMroTrayshed_v2.0.hap1.chr18.ver2.0.g234460.t01	VITMroTrayshed_v2.1.hap2.chr18	23101949	23105286	+	TIR-NBS-LRR	.	902	LRR_4	PF12799.8	43	0.11	86.0465	821	860
VITMroTrayshed_v2.0.hap1.chr18.ver2.0.g234460.t01	VITMroTrayshed_v2.1.hap2.chr18	23101949	23105286	+	TIR-NBS-LRR	.	902	LRR_8	PF13855.7	61	0.43	70.4918	861	902
VITMroTrayshed_v2.0.hap1.chr18.ver2.0.g234460.t01	VITMroTrayshed_v2.1.hap2.chr18	23101949	23105286	+	TIR-NBS-LRR	.	902	LRR_4	PF12799.8	43	0.57	72.093	869	899
VITMroTrayshed_v2.0.hap1.chr18.ver2.0.g234460.t02	VITMroTrayshed_v2.1.hap2.chr18	23101949	23105286	+	TIR-NBS-LRR	.	902	TIR	PF01582.21	176	5.1e-43	92.0455	34	203
VITMroTrayshed_v2.0.hap1.chr18.ver2.0.g234460.t02	VITMroTrayshed_v2.1.hap2.chr18	23101949	23105286	+	TIR-NBS-LRR	.	902	TIR_2	PF13676.7	121	7.1e-14	91.7355	36	152
VITMroTrayshed_v2.0.hap1.chr18.ver2.0.g234460.t02	VITMroTrayshed_v2.1.hap2.chr18	23101949	23105286	+	TIR-NBS-LRR	.	902	NB-ARC	PF00931.23	252	2.2e-29	89.2857	224	446
VITMroTrayshed_v2.0.hap1.chr18.ver2.0.g234460.t02	VITMroTrayshed_v2.1.hap2.chr18	23101949	23105286	+	TIR-NBS-LRR	.	902	LRR_3	PF07725.13	20	6.9e-06	100	632	651
VITMroTrayshed_v2.0.hap1.chr18.ver2.0.g234460.t02	VITMroTrayshed_v2.1.hap2.chr18	23101949	23105286	+	TIR-NBS-LRR	.	902	LRR_8	PF13855.7	61	0.098	91.8033	632	685
VITMroTrayshed_v2.0.hap1.chr18.ver2.0.g234460.t02	VITMroTrayshed_v2.1.hap2.chr18	23101949	23105286	+	TIR-NBS-LRR	.	902	LRR_4	PF12799.8	43	0.046	88.3721	655	694
VITMroTrayshed_v2.0.hap1.chr18.ver2.0.g234460.t02	VITMroTrayshed_v2.1.hap2.chr18	23101949	23105286	+	TIR-NBS-LRR	.	902	LRR_4	PF12799.8	43	0.017	97.6744	701	741
VITMroTrayshed_v2.0.hap1.chr18.ver2.0.g234460.t02	VITMroTrayshed_v2.1.hap2.chr18	23101949	23105286	+	TIR-NBS-LRR	.	902	LRR_8	PF13855.7	61	0.0001	95.082	702	758
VITMroTrayshed_v2.0.hap1.chr18.ver2.0.g234460.t02	VITMroTrayshed_v2.1.hap2.chr18	23101949	23105286	+	TIR-NBS-LRR	.	902	LRR_8	PF13855.7	61	0.41	67.2131	742	782
VITMroTrayshed_v2.0.hap1.chr18.ver2.0.g234460.t02	VITMroTrayshed_v2.1.hap2.chr18	23101949	23105286	+	TIR-NBS-LRR	.	902	LRR_4	PF12799.8	43	0.0057	90.6977	748	789
VITMroTrayshed_v2.0.hap1.chr18.ver2.0.g234460.t02	VITMroTrayshed_v2.1.hap2.chr18	23101949	23105286	+	TIR-NBS-LRR	.	902	LRR_8	PF13855.7	61	1.7e-05	93.4426	798	853
VITMroTrayshed_v2.0.hap1.chr18.ver2.0.g234460.t02	VITMroTrayshed_v2.1.hap2.chr18	23101949	23105286	+	TIR-NBS-LRR	.	902	LRR_4	PF12799.8	43	0.41	79.0698	800	835
VITMroTrayshed_v2.0.hap1.chr18.ver2.0.g234460.t02	VITMroTrayshed_v2.1.hap2.chr18	23101949	23105286	+	TIR-NBS-LRR	.	902	LRR_4	PF12799.8	43	0.11	86.0465	821	860
VITMroTrayshed_v2.0.hap1.chr18.ver2.0.g234460.t02	VITMroTrayshed_v2.1.hap2.chr18	23101949	23105286	+	TIR-NBS-LRR	.	902	LRR_8	PF13855.7	61	0.43	70.4918	861	902
VITMroTrayshed_v2.0.hap1.chr18.ver2.0.g234460.t02	VITMroTrayshed_v2.1.hap2.chr18	23101949	23105286	+	TIR-NBS-LRR	.	902	LRR_4	PF12799.8	43	0.57	72.093	869	899
VITMroTrayshed_v2.0.hap1.chr18.ver2.0.g234460.t03	VITMroTrayshed_v2.1.hap2.chr18	23101976	23105286	+	TIR-NBS-LRR	.	893	TIR	PF01582.21	176	5e-43	92.0455	25	194
VITMroTrayshed_v2.0.hap1.chr18.ver2.0.g234460.t03	VITMroTrayshed_v2.1.hap2.chr18	23101976	23105286	+	TIR-NBS-LRR	.	893	TIR_2	PF13676.7	121	7e-14	91.7355	27	143
VITMroTrayshed_v2.0.hap1.chr18.ver2.0.g234460.t03	VITMroTrayshed_v2.1.hap2.chr18	23101976	23105286	+	TIR-NBS-LRR	.	893	NB-ARC	PF00931.23	252	2.1e-29	89.2857	215	437
VITMroTrayshed_v2.0.hap1.chr18.ver2.0.g234460.t03	VITMroTrayshed_v2.1.hap2.chr18	23101976	23105286	+	TIR-NBS-LRR	.	893	LRR_3	PF07725.13	20	6.8e-06	100	623	642
VITMroTrayshed_v2.0.hap1.chr18.ver2.0.g234460.t03	VITMroTrayshed_v2.1.hap2.chr18	23101976	23105286	+	TIR-NBS-LRR	.	893	LRR_8	PF13855.7	61	0.096	91.8033	623	676
VITMroTrayshed_v2.0.hap1.chr18.ver2.0.g234460.t03	VITMroTrayshed_v2.1.hap2.chr18	23101976	23105286	+	TIR-NBS-LRR	.	893	LRR_4	PF12799.8	43	0.045	88.3721	646	685
VITMroTrayshed_v2.0.hap1.chr18.ver2.0.g234460.t03	VITMroTrayshed_v2.1.hap2.chr18	23101976	23105286	+	TIR-NBS-LRR	.	893	LRR_4	PF12799.8	43	0.017	97.6744	692	732
VITMroTrayshed_v2.0.hap1.chr18.ver2.0.g234460.t03	VITMroTrayshed_v2.1.hap2.chr18	23101976	23105286	+	TIR-NBS-LRR	.	893	LRR_8	PF13855.7	61	0.0001	95.082	693	749
VITMroTrayshed_v2.0.hap1.chr18.ver2.0.g234460.t03	VITMroTrayshed_v2.1.hap2.chr18	23101976	23105286	+	TIR-NBS-LRR	.	893	LRR_8	PF13855.7	61	0.4	67.2131	733	773
VITMroTrayshed_v2.0.hap1.chr18.ver2.0.g234460.t03	VITMroTrayshed_v2.1.hap2.chr18	23101976	23105286	+	TIR-NBS-LRR	.	893	LRR_4	PF12799.8	43	0.0056	90.6977	739	780
VITMroTrayshed_v2.0.hap1.chr18.ver2.0.g234460.t03	VITMroTrayshed_v2.1.hap2.chr18	23101976	23105286	+	TIR-NBS-LRR	.	893	LRR_8	PF13855.7	61	1.7e-05	93.4426	789	844
VITMroTrayshed_v2.0.hap1.chr18.ver2.0.g234460.t03	VITMroTrayshed_v2.1.hap2.chr18	23101976	23105286	+	TIR-NBS-LRR	.	893	LRR_4	PF12799.8	43	0.4	79.0698	791	826
VITMroTrayshed_v2.0.hap1.chr18.ver2.0.g234460.t03	VITMroTrayshed_v2.1.hap2.chr18	23101976	23105286	+	TIR-NBS-LRR	.	893	LRR_4	PF12799.8	43	0.11	86.0465	812	851
VITMroTrayshed_v2.0.hap1.chr18.ver2.0.g234460.t03	VITMroTrayshed_v2.1.hap2.chr18	23101976	23105286	+	TIR-NBS-LRR	.	893	LRR_8	PF13855.7	61	0.42	70.4918	852	893
VITMroTrayshed_v2.0.hap1.chr18.ver2.0.g234460.t03	VITMroTrayshed_v2.1.hap2.chr18	23101976	23105286	+	TIR-NBS-LRR	.	893	LRR_4	PF12799.8	43	0.56	72.093	860	890
VITMroTrayshed_v2.0.hap1.chr18.ver2.0.g234510.t01	VITMroTrayshed_v2.1.hap2.chr18	23182127	23185188	-	TIR-NBS	EVM	766	TIR	PF01582.21	176	1.8e-51	89.7727	11	173
VITMroTrayshed_v2.0.hap1.chr18.ver2.0.g234510.t01	VITMroTrayshed_v2.1.hap2.chr18	23182127	23185188	-	TIR-NBS	EVM	766	TIR_2	PF13676.7	121	2.9e-13	80.9917	13	109
VITMroTrayshed_v2.0.hap1.chr18.ver2.0.g234510.t01	VITMroTrayshed_v2.1.hap2.chr18	23182127	23185188	-	TIR-NBS	EVM	766	NB-ARC	PF00931.23	252	6.4e-15	63.4921	189	341
VITMroTrayshed_v2.0.hap1.chr18.ver2.0.g234520.t01	VITMroTrayshed_v2.1.hap2.chr18	23187348	23196302	-	TIR-NBS	.	564	TIR	PF01582.21	176	2.8e-53	92.6136	22	188
VITMroTrayshed_v2.0.hap1.chr18.ver2.0.g234520.t01	VITMroTrayshed_v2.1.hap2.chr18	23187348	23196302	-	TIR-NBS	.	564	TIR_2	PF13676.7	121	1.7e-13	87.6033	24	128
VITMroTrayshed_v2.0.hap1.chr18.ver2.0.g234520.t01	VITMroTrayshed_v2.1.hap2.chr18	23187348	23196302	-	TIR-NBS	.	564	NB-ARC	PF00931.23	252	4.9e-13	62.6984	198	348
VITMroTrayshed_v2.0.hap2.chr18.ver2.1.g475030.t01	VITMroTrayshed_v2.1.hap2.chr18	23339898	23344583	+	TIR-NBS-LRR	manual	1207	TIR	PF01582.21	176	8.4e-38	72.1591	2	137
VITMroTrayshed_v2.0.hap2.chr18.ver2.1.g475030.t01	VITMroTrayshed_v2.1.hap2.chr18	23339898	23344583	+	TIR-NBS-LRR	manual	1207	TIR_2	PF13676.7	121	1.1e-08	57.0248	2	67
VITMroTrayshed_v2.0.hap2.chr18.ver2.1.g475030.t01	VITMroTrayshed_v2.1.hap2.chr18	23339898	23344583	+	TIR-NBS-LRR	manual	1207	NB-ARC	PF00931.23	252	6.1e-26	90.4762	161	379
VITMroTrayshed_v2.0.hap2.chr18.ver2.1.g475030.t01	VITMroTrayshed_v2.1.hap2.chr18	23339898	23344583	+	TIR-NBS-LRR	manual	1207	LRR_3	PF07725.13	20	0.00065	100	565	584
VITMroTrayshed_v2.0.hap2.chr18.ver2.1.g475030.t01	VITMroTrayshed_v2.1.hap2.chr18	23339898	23344583	+	TIR-NBS-LRR	manual	1207	LRR_5	PF13306.7	128	7.6e-05	68.75	607	696
VITMroTrayshed_v2.0.hap2.chr18.ver2.0.g475070.t01	VITMroTrayshed_v2.1.hap2.chr18	23388978	23393513	+	TIR-NBS-LRR	.	1187	TIR	PF01582.21	176	1.2e-51	98.8636	12	189
VITMroTrayshed_v2.0.hap2.chr18.ver2.0.g475070.t01	VITMroTrayshed_v2.1.hap2.chr18	23388978	23393513	+	TIR-NBS-LRR	.	1187	TIR_2	PF13676.7	121	2.4e-13	80.1653	15	110
VITMroTrayshed_v2.0.hap2.chr18.ver2.0.g475070.t01	VITMroTrayshed_v2.1.hap2.chr18	23388978	23393513	+	TIR-NBS-LRR	.	1187	NB-ARC	PF00931.23	252	3.9e-29	84.127	204	405
VITMroTrayshed_v2.0.hap2.chr18.ver2.0.g475070.t01	VITMroTrayshed_v2.1.hap2.chr18	23388978	23393513	+	TIR-NBS-LRR	.	1187	LRR_3	PF07725.13	20	7.6e-06	95	610	628
VITMroTrayshed_v2.0.hap2.chr18.ver2.0.g475070.t01	VITMroTrayshed_v2.1.hap2.chr18	23388978	23393513	+	TIR-NBS-LRR	.	1187	LRR_4	PF12799.8	43	0.0043	79.0698	857	894
VITMroTrayshed_v2.0.hap2.chr18.ver2.0.g475070.t01	VITMroTrayshed_v2.1.hap2.chr18	23388978	23393513	+	TIR-NBS-LRR	.	1187	LRR_8	PF13855.7	61	0.00029	96.7213	857	916
VITMroTrayshed_v2.0.hap2.chr18.ver2.0.g475070.t01	VITMroTrayshed_v2.1.hap2.chr18	23388978	23393513	+	TIR-NBS-LRR	.	1187	LRR_4	PF12799.8	43	0.15	86.0465	882	921
VITMroTrayshed_v2.0.hap2.chr18.ver2.0.g475070.t02	VITMroTrayshed_v2.1.hap2.chr18	23388978	23393513	+	TIR-NBS-LRR	.	1187	TIR	PF01582.21	176	1.2e-51	98.8636	12	189
VITMroTrayshed_v2.0.hap2.chr18.ver2.0.g475070.t02	VITMroTrayshed_v2.1.hap2.chr18	23388978	23393513	+	TIR-NBS-LRR	.	1187	TIR_2	PF13676.7	121	2.4e-13	80.1653	15	110
VITMroTrayshed_v2.0.hap2.chr18.ver2.0.g475070.t02	VITMroTrayshed_v2.1.hap2.chr18	23388978	23393513	+	TIR-NBS-LRR	.	1187	NB-ARC	PF00931.23	252	3.9e-29	84.127	204	405
VITMroTrayshed_v2.0.hap2.chr18.ver2.0.g475070.t02	VITMroTrayshed_v2.1.hap2.chr18	23388978	23393513	+	TIR-NBS-LRR	.	1187	LRR_3	PF07725.13	20	7.6e-06	95	610	628
VITMroTrayshed_v2.0.hap2.chr18.ver2.0.g475070.t02	VITMroTrayshed_v2.1.hap2.chr18	23388978	23393513	+	TIR-NBS-LRR	.	1187	LRR_4	PF12799.8	43	0.0043	79.0698	857	894
VITMroTrayshed_v2.0.hap2.chr18.ver2.0.g475070.t02	VITMroTrayshed_v2.1.hap2.chr18	23388978	23393513	+	TIR-NBS-LRR	.	1187	LRR_8	PF13855.7	61	0.00029	96.7213	857	916
VITMroTrayshed_v2.0.hap2.chr18.ver2.0.g475070.t02	VITMroTrayshed_v2.1.hap2.chr18	23388978	23393513	+	TIR-NBS-LRR	.	1187	LRR_4	PF12799.8	43	0.15	86.0465	882	921
VITMroTrayshed_v2.0.hap2.chr18.ver2.0.g475070.t03	VITMroTrayshed_v2.1.hap2.chr18	23388978	23393513	+	TIR-NBS-LRR	.	1187	TIR	PF01582.21	176	1.2e-51	98.8636	12	189
VITMroTrayshed_v2.0.hap2.chr18.ver2.0.g475070.t03	VITMroTrayshed_v2.1.hap2.chr18	23388978	23393513	+	TIR-NBS-LRR	.	1187	TIR_2	PF13676.7	121	2.4e-13	80.1653	15	110
VITMroTrayshed_v2.0.hap2.chr18.ver2.0.g475070.t03	VITMroTrayshed_v2.1.hap2.chr18	23388978	23393513	+	TIR-NBS-LRR	.	1187	NB-ARC	PF00931.23	252	3.9e-29	84.127	204	405
VITMroTrayshed_v2.0.hap2.chr18.ver2.0.g475070.t03	VITMroTrayshed_v2.1.hap2.chr18	23388978	23393513	+	TIR-NBS-LRR	.	1187	LRR_3	PF07725.13	20	7.6e-06	95	610	628
VITMroTrayshed_v2.0.hap2.chr18.ver2.0.g475070.t03	VITMroTrayshed_v2.1.hap2.chr18	23388978	23393513	+	TIR-NBS-LRR	.	1187	LRR_4	PF12799.8	43	0.0043	79.0698	857	894
VITMroTrayshed_v2.0.hap2.chr18.ver2.0.g475070.t03	VITMroTrayshed_v2.1.hap2.chr18	23388978	23393513	+	TIR-NBS-LRR	.	1187	LRR_8	PF13855.7	61	0.00029	96.7213	857	916
VITMroTrayshed_v2.0.hap2.chr18.ver2.0.g475070.t03	VITMroTrayshed_v2.1.hap2.chr18	23388978	23393513	+	TIR-NBS-LRR	.	1187	LRR_4	PF12799.8	43	0.15	86.0465	882	921
VITMroTrayshed_v2.0.hap2.chr18.ver2.0.g475070.t04	VITMroTrayshed_v2.1.hap2.chr18	23388978	23393513	+	TIR-NBS-LRR	.	1187	TIR	PF01582.21	176	1.2e-51	98.8636	12	189
VITMroTrayshed_v2.0.hap2.chr18.ver2.0.g475070.t04	VITMroTrayshed_v2.1.hap2.chr18	23388978	23393513	+	TIR-NBS-LRR	.	1187	TIR_2	PF13676.7	121	2.4e-13	80.1653	15	110
VITMroTrayshed_v2.0.hap2.chr18.ver2.0.g475070.t04	VITMroTrayshed_v2.1.hap2.chr18	23388978	23393513	+	TIR-NBS-LRR	.	1187	NB-ARC	PF00931.23	252	3.9e-29	84.127	204	405
VITMroTrayshed_v2.0.hap2.chr18.ver2.0.g475070.t04	VITMroTrayshed_v2.1.hap2.chr18	23388978	23393513	+	TIR-NBS-LRR	.	1187	LRR_3	PF07725.13	20	7.6e-06	95	610	628
VITMroTrayshed_v2.0.hap2.chr18.ver2.0.g475070.t04	VITMroTrayshed_v2.1.hap2.chr18	23388978	23393513	+	TIR-NBS-LRR	.	1187	LRR_4	PF12799.8	43	0.0043	79.0698	857	894
VITMroTrayshed_v2.0.hap2.chr18.ver2.0.g475070.t04	VITMroTrayshed_v2.1.hap2.chr18	23388978	23393513	+	TIR-NBS-LRR	.	1187	LRR_8	PF13855.7	61	0.00029	96.7213	857	916
VITMroTrayshed_v2.0.hap2.chr18.ver2.0.g475070.t04	VITMroTrayshed_v2.1.hap2.chr18	23388978	23393513	+	TIR-NBS-LRR	.	1187	LRR_4	PF12799.8	43	0.15	86.0465	882	921
VITMroTrayshed_v2.0.hap2.chr18.ver2.1.g475071.t01	VITMroTrayshed_v2.1.hap2.chr18	23417577	23420585	+	TIR-NBS-LRR	manual	643	TIR	PF01582.21	176	2.8e-54	97.1591	17	191
VITMroTrayshed_v2.0.hap2.chr18.ver2.1.g475071.t01	VITMroTrayshed_v2.1.hap2.chr18	23417577	23420585	+	TIR-NBS-LRR	manual	643	TIR_2	PF13676.7	121	3.4e-18	80.9917	20	116
VITMroTrayshed_v2.0.hap2.chr18.ver2.1.g475071.t01	VITMroTrayshed_v2.1.hap2.chr18	23417577	23420585	+	TIR-NBS-LRR	manual	643	NB-ARC	PF00931.23	252	2.3e-28	90.873	207	426
VITMroTrayshed_v2.0.hap2.chr18.ver2.1.g475071.t01	VITMroTrayshed_v2.1.hap2.chr18	23417577	23420585	+	TIR-NBS-LRR	manual	643	LRR_3	PF07725.13	20	0.25	100	602	621
VITMroTrayshed_v2.0.hap2.chr18.ver2.0.g475080.t01	VITMroTrayshed_v2.1.hap2.chr18	23449532	23454980	+	TIR-NBS-LRR	.	1317	TIR	PF01582.21	176	8.9e-52	94.3182	36	207
VITMroTrayshed_v2.0.hap2.chr18.ver2.0.g475080.t01	VITMroTrayshed_v2.1.hap2.chr18	23449532	23454980	+	TIR-NBS-LRR	.	1317	TIR_2	PF13676.7	121	7.1e-18	80.9917	39	135
VITMroTrayshed_v2.0.hap2.chr18.ver2.0.g475080.t01	VITMroTrayshed_v2.1.hap2.chr18	23449532	23454980	+	TIR-NBS-LRR	.	1317	NB-ARC	PF00931.23	252	3e-23	92.0635	225	454
VITMroTrayshed_v2.0.hap2.chr18.ver2.0.g475080.t01	VITMroTrayshed_v2.1.hap2.chr18	23449532	23454980	+	TIR-NBS-LRR	.	1317	LRR_3	PF07725.13	20	0.0023	100	628	647
VITMroTrayshed_v2.0.hap2.chr18.ver2.0.g475080.t01	VITMroTrayshed_v2.1.hap2.chr18	23449532	23454980	+	TIR-NBS-LRR	.	1317	LRR_4	PF12799.8	43	0.97	88.3721	699	738
VITMroTrayshed_v2.0.hap2.chr18.ver2.0.g475080.t01	VITMroTrayshed_v2.1.hap2.chr18	23449532	23454980	+	TIR-NBS-LRR	.	1317	LRR_4	PF12799.8	43	0.59	95.3488	721	760
VITMroTrayshed_v2.0.hap2.chr18.ver2.0.g475080.t01	VITMroTrayshed_v2.1.hap2.chr18	23449532	23454980	+	TIR-NBS-LRR	.	1317	LRR_4	PF12799.8	43	0.0087	90.6977	744	784
VITMroTrayshed_v2.0.hap2.chr18.ver2.0.g475080.t01	VITMroTrayshed_v2.1.hap2.chr18	23449532	23454980	+	TIR-NBS-LRR	.	1317	LRR_8	PF13855.7	61	0.19	93.4426	746	801
VITMroTrayshed_v2.0.hap2.chr18.ver2.0.g475080.t01	VITMroTrayshed_v2.1.hap2.chr18	23449532	23454980	+	TIR-NBS-LRR	.	1317	LRR_4	PF12799.8	43	0.11	76.7442	767	801
VITMroTrayshed_v2.0.hap2.chr18.ver2.0.g475080.t02	VITMroTrayshed_v2.1.hap2.chr18	23449532	23453503	+	TIR-NBS-LRR	.	926	TIR	PF01582.21	176	5.2e-52	94.3182	36	207
VITMroTrayshed_v2.0.hap2.chr18.ver2.0.g475080.t02	VITMroTrayshed_v2.1.hap2.chr18	23449532	23453503	+	TIR-NBS-LRR	.	926	TIR_2	PF13676.7	121	4.5e-18	80.9917	39	135
VITMroTrayshed_v2.0.hap2.chr18.ver2.0.g475080.t02	VITMroTrayshed_v2.1.hap2.chr18	23449532	23453503	+	TIR-NBS-LRR	.	926	NB-ARC	PF00931.23	252	1.7e-23	92.0635	225	454
VITMroTrayshed_v2.0.hap2.chr18.ver2.0.g475080.t02	VITMroTrayshed_v2.1.hap2.chr18	23449532	23453503	+	TIR-NBS-LRR	.	926	LRR_3	PF07725.13	20	0.0015	100	628	647
VITMroTrayshed_v2.0.hap2.chr18.ver2.0.g475080.t02	VITMroTrayshed_v2.1.hap2.chr18	23449532	23453503	+	TIR-NBS-LRR	.	926	LRR_8	PF13855.7	61	0.75	95.082	674	730
VITMroTrayshed_v2.0.hap2.chr18.ver2.0.g475080.t02	VITMroTrayshed_v2.1.hap2.chr18	23449532	23453503	+	TIR-NBS-LRR	.	926	LRR_4	PF12799.8	43	0.63	88.3721	699	738
VITMroTrayshed_v2.0.hap2.chr18.ver2.0.g475080.t02	VITMroTrayshed_v2.1.hap2.chr18	23449532	23453503	+	TIR-NBS-LRR	.	926	LRR_4	PF12799.8	43	0.39	95.3488	721	760
VITMroTrayshed_v2.0.hap2.chr18.ver2.0.g475080.t02	VITMroTrayshed_v2.1.hap2.chr18	23449532	23453503	+	TIR-NBS-LRR	.	926	LRR_4	PF12799.8	43	0.0075	90.6977	744	784
VITMroTrayshed_v2.0.hap2.chr18.ver2.0.g475080.t02	VITMroTrayshed_v2.1.hap2.chr18	23449532	23453503	+	TIR-NBS-LRR	.	926	LRR_8	PF13855.7	61	0.12	93.4426	746	801
VITMroTrayshed_v2.0.hap2.chr18.ver2.1.g475082.t01	VITMroTrayshed_v2.1.hap2.chr18	23468177	23471289	+	TIR-NBS-LRR	manual	893	TIR	PF01582.21	176	1.5e-56	99.4318	13	191
VITMroTrayshed_v2.0.hap2.chr18.ver2.1.g475082.t01	VITMroTrayshed_v2.1.hap2.chr18	23468177	23471289	+	TIR-NBS-LRR	manual	893	TIR_2	PF13676.7	121	3.9e-14	80.9917	16	112
VITMroTrayshed_v2.0.hap2.chr18.ver2.1.g475082.t01	VITMroTrayshed_v2.1.hap2.chr18	23468177	23471289	+	TIR-NBS-LRR	manual	893	NB-ARC	PF00931.23	252	2.3e-24	87.6984	196	404
VITMroTrayshed_v2.0.hap2.chr18.ver2.1.g475082.t01	VITMroTrayshed_v2.1.hap2.chr18	23468177	23471289	+	TIR-NBS-LRR	manual	893	LRR_3	PF07725.13	20	0.00019	100	597	616
VITMroTrayshed_v2.0.hap2.chr18.ver2.1.g475082.t01	VITMroTrayshed_v2.1.hap2.chr18	23468177	23471289	+	TIR-NBS-LRR	manual	893	LRR_8	PF13855.7	61	0.4	95.082	620	676
VITMroTrayshed_v2.0.hap2.chr18.ver2.1.g475082.t01	VITMroTrayshed_v2.1.hap2.chr18	23468177	23471289	+	TIR-NBS-LRR	manual	893	LRR_4	PF12799.8	43	0.58	93.0233	667	708
VITMroTrayshed_v2.0.hap2.chr18.ver2.1.g475082.t01	VITMroTrayshed_v2.1.hap2.chr18	23468177	23471289	+	TIR-NBS-LRR	manual	893	LRR_4	PF12799.8	43	0.87	81.3953	717	753
VITMroTrayshed_v2.0.hap2.chr18.ver2.1.g475191.t01	VITMroTrayshed_v2.1.hap2.chr18	23585363	23589250	-	TIR-NBS-LRR	manual	1105	TIR	PF01582.21	176	3.9e-51	99.4318	17	195
VITMroTrayshed_v2.0.hap2.chr18.ver2.1.g475191.t01	VITMroTrayshed_v2.1.hap2.chr18	23585363	23589250	-	TIR-NBS-LRR	manual	1105	TIR_2	PF13676.7	121	1e-15	80.9917	19	115
VITMroTrayshed_v2.0.hap2.chr18.ver2.1.g475191.t01	VITMroTrayshed_v2.1.hap2.chr18	23585363	23589250	-	TIR-NBS-LRR	manual	1105	NB-ARC	PF00931.23	252	3.4e-30	90.873	196	415
VITMroTrayshed_v2.0.hap2.chr18.ver2.1.g475191.t01	VITMroTrayshed_v2.1.hap2.chr18	23585363	23589250	-	TIR-NBS-LRR	manual	1105	LRR_3	PF07725.13	20	1.3e-06	100	610	629
VITMroTrayshed_v2.0.hap2.chr18.ver2.1.g475191.t01	VITMroTrayshed_v2.1.hap2.chr18	23585363	23589250	-	TIR-NBS-LRR	manual	1105	LRR_8	PF13855.7	61	0.0016	95.082	790	847
VITMroTrayshed_v2.0.hap2.chr18.ver2.1.g475191.t01	VITMroTrayshed_v2.1.hap2.chr18	23585363	23589250	-	TIR-NBS-LRR	manual	1105	LRR_4	PF12799.8	43	0.58	95.3488	815	857
VITMroTrayshed_v2.0.hap2.chr18.ver2.1.g475201.t01	VITMroTrayshed_v2.1.hap2.chr18	23616123	23620847	+	TIR-NBS-LRR	manual	848	TIR	PF01582.21	176	7.5e-49	92.6136	34	203
VITMroTrayshed_v2.0.hap2.chr18.ver2.1.g475201.t01	VITMroTrayshed_v2.1.hap2.chr18	23616123	23620847	+	TIR-NBS-LRR	manual	848	TIR_2	PF13676.7	121	7.4e-15	76.8595	37	131
VITMroTrayshed_v2.0.hap2.chr18.ver2.1.g475201.t01	VITMroTrayshed_v2.1.hap2.chr18	23616123	23620847	+	TIR-NBS-LRR	manual	848	TIR	PF01582.21	176	1.5e-34	88.6364	233	395
VITMroTrayshed_v2.0.hap2.chr18.ver2.1.g475201.t01	VITMroTrayshed_v2.1.hap2.chr18	23616123	23620847	+	TIR-NBS-LRR	manual	848	TIR_2	PF13676.7	121	2.2e-13	76.8595	235	328
VITMroTrayshed_v2.0.hap2.chr18.ver2.1.g475201.t01	VITMroTrayshed_v2.1.hap2.chr18	23616123	23620847	+	TIR-NBS-LRR	manual	848	NB-ARC	PF00931.23	252	1.3e-26	94.4444	421	651
VITMroTrayshed_v2.0.hap2.chr18.ver2.1.g475201.t01	VITMroTrayshed_v2.1.hap2.chr18	23616123	23620847	+	TIR-NBS-LRR	manual	848	LRR_3	PF07725.13	20	0.0034	90	830	847
VITMroTrayshed_v2.0.hap2.chr18.ver2.1.g475211.t01	VITMroTrayshed_v2.1.hap2.chr18	23624297	23627522	-	NBS-LRR	manual	938	NB-ARC	PF00931.23	252	1.6e-28	91.2698	29	250
VITMroTrayshed_v2.0.hap2.chr18.ver2.1.g475211.t01	VITMroTrayshed_v2.1.hap2.chr18	23624297	23627522	-	NBS-LRR	manual	938	LRR_3	PF07725.13	20	4.3e-08	100	443	462
VITMroTrayshed_v2.0.hap2.chr18.ver2.1.g475211.t01	VITMroTrayshed_v2.1.hap2.chr18	23624297	23627522	-	NBS-LRR	manual	938	LRR_8	PF13855.7	61	0.00033	95.082	623	680
VITMroTrayshed_v2.0.hap2.chr18.ver2.1.g475211.t01	VITMroTrayshed_v2.1.hap2.chr18	23624297	23627522	-	NBS-LRR	manual	938	LRR_4	PF12799.8	43	0.7	95.3488	648	690
VITMroTrayshed_v2.0.hap2.chr18.ver2.1.g475212.t01	VITMroTrayshed_v2.1.hap2.chr18	23633302	23635058	-	TIR-NBS	manual	506	TIR	PF01582.21	176	8.2e-44	71.0227	13	134
VITMroTrayshed_v2.0.hap2.chr18.ver2.1.g475212.t01	VITMroTrayshed_v2.1.hap2.chr18	23633302	23635058	-	TIR-NBS	manual	506	TIR_2	PF13676.7	121	3e-16	86.7769	15	116
VITMroTrayshed_v2.0.hap2.chr18.ver2.1.g475212.t01	VITMroTrayshed_v2.1.hap2.chr18	23633302	23635058	-	TIR-NBS	manual	506	NB-ARC	PF00931.23	252	5.8e-26	94.8413	167	394
VITMroTrayshed_v2.0.hap2.chr18.ver2.1.g475213.t01	VITMroTrayshed_v2.1.hap2.chr18	23656540	23660609	+	TIR-NBS-LRR	manual	1086	TIR	PF01582.21	176	7.9e-51	98.8636	12	190
VITMroTrayshed_v2.0.hap2.chr18.ver2.1.g475213.t01	VITMroTrayshed_v2.1.hap2.chr18	23656540	23660609	+	TIR-NBS-LRR	manual	1086	TIR_2	PF13676.7	121	1.1e-15	80.9917	14	110
VITMroTrayshed_v2.0.hap2.chr18.ver2.1.g475213.t01	VITMroTrayshed_v2.1.hap2.chr18	23656540	23660609	+	TIR-NBS-LRR	manual	1086	NB-ARC	PF00931.23	252	1.5e-27	86.9048	205	412
VITMroTrayshed_v2.0.hap2.chr18.ver2.1.g475213.t01	VITMroTrayshed_v2.1.hap2.chr18	23656540	23660609	+	TIR-NBS-LRR	manual	1086	LRR_3	PF07725.13	20	8.1e-06	100	611	630
VITMroTrayshed_v2.0.hap2.chr18.ver2.1.g475213.t01	VITMroTrayshed_v2.1.hap2.chr18	23656540	23660609	+	TIR-NBS-LRR	manual	1086	LRR_4	PF12799.8	43	0.14	76.7442	791	827
VITMroTrayshed_v2.0.hap2.chr18.ver2.1.g475213.t01	VITMroTrayshed_v2.1.hap2.chr18	23656540	23660609	+	TIR-NBS-LRR	manual	1086	LRR_8	PF13855.7	61	0.22	95.082	791	847
VITMroTrayshed_v2.0.hap2.chr18.ver2.1.g475214.t01	VITMroTrayshed_v2.1.hap2.chr18	23677773	23681909	+	TIR-NBS-LRR	manual	1106	TIR	PF01582.21	176	1.1e-52	99.4318	12	191
VITMroTrayshed_v2.0.hap2.chr18.ver2.1.g475214.t01	VITMroTrayshed_v2.1.hap2.chr18	23677773	23681909	+	TIR-NBS-LRR	manual	1106	TIR_2	PF13676.7	121	1e-15	80.9917	14	110
VITMroTrayshed_v2.0.hap2.chr18.ver2.1.g475214.t01	VITMroTrayshed_v2.1.hap2.chr18	23677773	23681909	+	TIR-NBS-LRR	manual	1106	NB-ARC	PF00931.23	252	8e-26	91.2698	196	415
VITMroTrayshed_v2.0.hap2.chr18.ver2.1.g475214.t01	VITMroTrayshed_v2.1.hap2.chr18	23677773	23681909	+	TIR-NBS-LRR	manual	1106	LRR_3	PF07725.13	20	5.8e-07	100	611	630
VITMroTrayshed_v2.0.hap2.chr18.ver2.1.g475214.t01	VITMroTrayshed_v2.1.hap2.chr18	23677773	23681909	+	TIR-NBS-LRR	manual	1106	LRR_4	PF12799.8	43	0.42	86.0465	681	720
VITMroTrayshed_v2.0.hap2.chr18.ver2.1.g475214.t01	VITMroTrayshed_v2.1.hap2.chr18	23677773	23681909	+	TIR-NBS-LRR	manual	1106	LRR_8	PF13855.7	61	0.39	96.7213	791	849
VITMroTrayshed_v2.0.hap2.chr18.ver2.1.g475214.t01	VITMroTrayshed_v2.1.hap2.chr18	23677773	23681909	+	TIR-NBS-LRR	manual	1106	LRR_4	PF12799.8	43	0.12	88.3721	816	854
VITMroTrayshed_v2.0.hap2.chr18.ver2.1.g475361.t01	VITMroTrayshed_v2.1.hap2.chr18	23723579	23729865	+	TIR-NBS-LRR	manual	1827	TIR	PF01582.21	176	2.2e-48	94.8864	12	182
VITMroTrayshed_v2.0.hap2.chr18.ver2.1.g475361.t01	VITMroTrayshed_v2.1.hap2.chr18	23723579	23729865	+	TIR-NBS-LRR	manual	1827	TIR_2	PF13676.7	121	9.3e-15	80.9917	14	110
VITMroTrayshed_v2.0.hap2.chr18.ver2.1.g475361.t01	VITMroTrayshed_v2.1.hap2.chr18	23723579	23729865	+	TIR-NBS-LRR	manual	1827	NB-ARC	PF00931.23	252	3.9e-24	84.5238	205	407
VITMroTrayshed_v2.0.hap2.chr18.ver2.1.g475361.t01	VITMroTrayshed_v2.1.hap2.chr18	23723579	23729865	+	TIR-NBS-LRR	manual	1827	LRR_3	PF07725.13	20	2.2e-07	100	610	629
VITMroTrayshed_v2.0.hap2.chr18.ver2.1.g475361.t01	VITMroTrayshed_v2.1.hap2.chr18	23723579	23729865	+	TIR-NBS-LRR	manual	1827	LRR_4	PF12799.8	43	0.7	90.6977	1500	1538
VITMroTrayshed_v2.0.hap2.chr18.ver2.1.g475361.t01	VITMroTrayshed_v2.1.hap2.chr18	23723579	23729865	+	TIR-NBS-LRR	manual	1827	LRR_8	PF13855.7	61	0.0054	95.082	1500	1556
VITMroTrayshed_v2.0.hap2.chr18.ver2.1.g475361.t01	VITMroTrayshed_v2.1.hap2.chr18	23723579	23729865	+	TIR-NBS-LRR	manual	1827	LRR_4	PF12799.8	43	0.17	95.3488	1525	1566
VITMroTrayshed_v2.0.hap2.chr18.ver2.1.g475631.t01	VITMroTrayshed_v2.1.hap2.chr18	24432010	24435022	+	NBS	manual	386	NB-ARC	PF00931.23	252	1.5e-16	51.1905	170	295
VITMroTrayshed_v2.0.hap2.chr18.ver2.1.g475681.t01	VITMroTrayshed_v2.1.hap2.chr18	24539635	24543749	+	TIR-NBS-LRR	manual	1163	TIR	PF01582.21	176	1.2e-48	92.6136	21	186
VITMroTrayshed_v2.0.hap2.chr18.ver2.1.g475681.t01	VITMroTrayshed_v2.1.hap2.chr18	24539635	24543749	+	TIR-NBS-LRR	manual	1163	TIR_2	PF13676.7	121	5.6e-13	80.9917	24	119
VITMroTrayshed_v2.0.hap2.chr18.ver2.1.g475681.t01	VITMroTrayshed_v2.1.hap2.chr18	24539635	24543749	+	TIR-NBS-LRR	manual	1163	NB-ARC	PF00931.23	252	1.4e-26	88.8889	203	420
VITMroTrayshed_v2.0.hap2.chr18.ver2.1.g475681.t01	VITMroTrayshed_v2.1.hap2.chr18	24539635	24543749	+	TIR-NBS-LRR	manual	1163	LRR_3	PF07725.13	20	0.0016	95	614	632
VITMroTrayshed_v2.0.hap2.chr18.ver2.1.g475681.t01	VITMroTrayshed_v2.1.hap2.chr18	24539635	24543749	+	TIR-NBS-LRR	manual	1163	LRR_4	PF12799.8	43	0.073	83.7209	636	673
VITMroTrayshed_v2.0.hap2.chr18.ver2.1.g475681.t01	VITMroTrayshed_v2.1.hap2.chr18	24539635	24543749	+	TIR-NBS-LRR	manual	1163	LRR_8	PF13855.7	61	0.0025	95.082	636	692
VITMroTrayshed_v2.0.hap2.chr18.ver2.1.g475681.t01	VITMroTrayshed_v2.1.hap2.chr18	24539635	24543749	+	TIR-NBS-LRR	manual	1163	LRR_4	PF12799.8	43	0.35	74.4186	683	715
VITMroTrayshed_v2.0.hap2.chr18.ver2.1.g475681.t01	VITMroTrayshed_v2.1.hap2.chr18	24539635	24543749	+	TIR-NBS-LRR	manual	1163	LRR_8	PF13855.7	61	0.1	95.082	706	762
VITMroTrayshed_v2.0.hap2.chr18.ver2.1.g475681.t01	VITMroTrayshed_v2.1.hap2.chr18	24539635	24543749	+	TIR-NBS-LRR	manual	1163	LRR_8	PF13855.7	61	0.5	65.5738	818	856
VITMroTrayshed_v2.0.hap2.chr18.ver2.1.g475681.t01	VITMroTrayshed_v2.1.hap2.chr18	24539635	24543749	+	TIR-NBS-LRR	manual	1163	LRR_8	PF13855.7	61	0.019	60.6557	868	903
VITMroTrayshed_v2.0.hap2.chr18.ver2.1.g475681.t01	VITMroTrayshed_v2.1.hap2.chr18	24539635	24543749	+	TIR-NBS-LRR	manual	1163	LRR_4	PF12799.8	43	0.00073	93.0233	872	913
VITMroTrayshed_v2.0.hap2.chr18.ver2.1.g475681.t01	VITMroTrayshed_v2.1.hap2.chr18	24539635	24543749	+	TIR-NBS-LRR	manual	1163	LRR_4	PF12799.8	43	0.0062	95.3488	927	970
VITMroTrayshed_v2.0.hap2.chr18.ver2.1.g475681.t01	VITMroTrayshed_v2.1.hap2.chr18	24539635	24543749	+	TIR-NBS-LRR	manual	1163	LRR_4	PF12799.8	43	0.94	86.0465	1048	1087
VITMroTrayshed_v2.0.hap2.chr18.ver2.1.g475681.t01	VITMroTrayshed_v2.1.hap2.chr18	24539635	24543749	+	TIR-NBS-LRR	manual	1163	LRR_8	PF13855.7	61	0.62	60.6557	1071	1106
VITMroTrayshed_v2.0.hap2.chr18.ver2.1.g475682.t01	VITMroTrayshed_v2.1.hap2.chr18	24558906	24563918	+	TIR-NBS-LRR	manual	1453	TIR	PF01582.21	176	3.2e-49	92.0455	29	193
VITMroTrayshed_v2.0.hap2.chr18.ver2.1.g475682.t01	VITMroTrayshed_v2.1.hap2.chr18	24558906	24563918	+	TIR-NBS-LRR	manual	1453	TIR_2	PF13676.7	121	2.2e-13	81.8182	32	128
VITMroTrayshed_v2.0.hap2.chr18.ver2.1.g475682.t01	VITMroTrayshed_v2.1.hap2.chr18	24558906	24563918	+	TIR-NBS-LRR	manual	1453	NB-ARC	PF00931.23	252	1e-28	88.0952	214	429
VITMroTrayshed_v2.0.hap2.chr18.ver2.1.g475682.t01	VITMroTrayshed_v2.1.hap2.chr18	24558906	24563918	+	TIR-NBS-LRR	manual	1453	LRR_3	PF07725.13	20	0.0053	95	623	641
VITMroTrayshed_v2.0.hap2.chr18.ver2.1.g475682.t01	VITMroTrayshed_v2.1.hap2.chr18	24558906	24563918	+	TIR-NBS-LRR	manual	1453	LRR_4	PF12799.8	43	0.46	76.7442	645	679
VITMroTrayshed_v2.0.hap2.chr18.ver2.1.g475682.t01	VITMroTrayshed_v2.1.hap2.chr18	24558906	24563918	+	TIR-NBS-LRR	manual	1453	LRR_8	PF13855.7	61	0.63	91.8033	647	701
VITMroTrayshed_v2.0.hap2.chr18.ver2.1.g475682.t01	VITMroTrayshed_v2.1.hap2.chr18	24558906	24563918	+	TIR-NBS-LRR	manual	1453	LRR_4	PF12799.8	43	0.0054	86.0465	715	753
VITMroTrayshed_v2.0.hap2.chr18.ver2.1.g475682.t01	VITMroTrayshed_v2.1.hap2.chr18	24558906	24563918	+	TIR-NBS-LRR	manual	1453	LRR_8	PF13855.7	61	0.00037	95.082	715	771
VITMroTrayshed_v2.0.hap2.chr18.ver2.1.g475682.t01	VITMroTrayshed_v2.1.hap2.chr18	24558906	24563918	+	TIR-NBS-LRR	manual	1453	LRR_4	PF12799.8	43	0.58	86.0465	762	801
VITMroTrayshed_v2.0.hap2.chr18.ver2.1.g475682.t01	VITMroTrayshed_v2.1.hap2.chr18	24558906	24563918	+	TIR-NBS-LRR	manual	1453	LRR_8	PF13855.7	61	0.00013	93.4426	787	842
VITMroTrayshed_v2.0.hap2.chr18.ver2.1.g475682.t01	VITMroTrayshed_v2.1.hap2.chr18	24558906	24563918	+	TIR-NBS-LRR	manual	1453	LRR_4	PF12799.8	43	0.32	93.0233	809	850
VITMroTrayshed_v2.0.hap2.chr18.ver2.1.g475682.t01	VITMroTrayshed_v2.1.hap2.chr18	24558906	24563918	+	TIR-NBS-LRR	manual	1453	LRR_4	PF12799.8	43	0.59	88.3721	857	896
VITMroTrayshed_v2.0.hap2.chr18.ver2.1.g475682.t01	VITMroTrayshed_v2.1.hap2.chr18	24558906	24563918	+	TIR-NBS-LRR	manual	1453	LRR_8	PF13855.7	61	0.00052	67.2131	897	936
VITMroTrayshed_v2.0.hap2.chr18.ver2.1.g475682.t01	VITMroTrayshed_v2.1.hap2.chr18	24558906	24563918	+	TIR-NBS-LRR	manual	1453	LRR_4	PF12799.8	43	0.043	88.3721	905	944
VITMroTrayshed_v2.0.hap2.chr18.ver2.1.g475682.t01	VITMroTrayshed_v2.1.hap2.chr18	24558906	24563918	+	TIR-NBS-LRR	manual	1453	LRR_8	PF13855.7	61	0.11	60.6557	948	983
VITMroTrayshed_v2.0.hap2.chr18.ver2.1.g475682.t01	VITMroTrayshed_v2.1.hap2.chr18	24558906	24563918	+	TIR-NBS-LRR	manual	1453	LRR_4	PF12799.8	43	0.01	93.0233	952	993
VITMroTrayshed_v2.0.hap2.chr18.ver2.1.g475682.t01	VITMroTrayshed_v2.1.hap2.chr18	24558906	24563918	+	TIR-NBS-LRR	manual	1453	LRR_8	PF13855.7	61	0.2	63.9344	993	1030
VITMroTrayshed_v2.0.hap2.chr18.ver2.1.g475682.t01	VITMroTrayshed_v2.1.hap2.chr18	24558906	24563918	+	TIR-NBS-LRR	manual	1453	LRR_4	PF12799.8	43	0.48	90.6977	998	1038
VITMroTrayshed_v2.0.hap2.chr18.ver2.1.g475682.t01	VITMroTrayshed_v2.1.hap2.chr18	24558906	24563918	+	TIR-NBS-LRR	manual	1453	LRR_4	PF12799.8	43	0.33	86.0465	1140	1179
VITMroTrayshed_v2.0.hap2.chr18.ver2.1.g475682.t01	VITMroTrayshed_v2.1.hap2.chr18	24558906	24563918	+	TIR-NBS-LRR	manual	1453	LRR_8	PF13855.7	61	0.43	60.6557	1163	1198
VITMroTrayshed_v2.0.hap2.chr18.ver2.1.g475691.t01	VITMroTrayshed_v2.1.hap2.chr18	24589208	24594094	+	TIR-NBS-LRR	manual	1418	TIR	PF01582.21	176	1.5e-47	93.1818	20	186
VITMroTrayshed_v2.0.hap2.chr18.ver2.1.g475691.t01	VITMroTrayshed_v2.1.hap2.chr18	24589208	24594094	+	TIR-NBS-LRR	manual	1418	TIR_2	PF13676.7	121	6.1e-12	80.9917	23	118
VITMroTrayshed_v2.0.hap2.chr18.ver2.1.g475691.t01	VITMroTrayshed_v2.1.hap2.chr18	24589208	24594094	+	TIR-NBS-LRR	manual	1418	NB-ARC	PF00931.23	252	5e-28	90.0794	200	420
VITMroTrayshed_v2.0.hap2.chr18.ver2.1.g475691.t01	VITMroTrayshed_v2.1.hap2.chr18	24589208	24594094	+	TIR-NBS-LRR	manual	1418	LRR_3	PF07725.13	20	0.0034	95	614	632
VITMroTrayshed_v2.0.hap2.chr18.ver2.1.g475691.t01	VITMroTrayshed_v2.1.hap2.chr18	24589208	24594094	+	TIR-NBS-LRR	manual	1418	LRR_4	PF12799.8	43	0.21	88.3721	636	672
VITMroTrayshed_v2.0.hap2.chr18.ver2.1.g475691.t01	VITMroTrayshed_v2.1.hap2.chr18	24589208	24594094	+	TIR-NBS-LRR	manual	1418	LRR_8	PF13855.7	61	0.052	70.4918	652	694
VITMroTrayshed_v2.0.hap2.chr18.ver2.1.g475691.t01	VITMroTrayshed_v2.1.hap2.chr18	24589208	24594094	+	TIR-NBS-LRR	manual	1418	LRR_4	PF12799.8	43	0.031	81.3953	684	720
VITMroTrayshed_v2.0.hap2.chr18.ver2.1.g475691.t01	VITMroTrayshed_v2.1.hap2.chr18	24589208	24594094	+	TIR-NBS-LRR	manual	1418	LRR_8	PF13855.7	61	0.017	95.082	706	762
VITMroTrayshed_v2.0.hap2.chr18.ver2.1.g475691.t01	VITMroTrayshed_v2.1.hap2.chr18	24589208	24594094	+	TIR-NBS-LRR	manual	1418	LRR_4	PF12799.8	43	0.018	86.0465	731	769
VITMroTrayshed_v2.0.hap2.chr18.ver2.1.g475691.t01	VITMroTrayshed_v2.1.hap2.chr18	24589208	24594094	+	TIR-NBS-LRR	manual	1418	LRR_8	PF13855.7	61	0.019	81.9672	762	810
VITMroTrayshed_v2.0.hap2.chr18.ver2.1.g475691.t01	VITMroTrayshed_v2.1.hap2.chr18	24589208	24594094	+	TIR-NBS-LRR	manual	1418	LRR_4	PF12799.8	43	0.0038	90.6977	777	818
VITMroTrayshed_v2.0.hap2.chr18.ver2.1.g475691.t01	VITMroTrayshed_v2.1.hap2.chr18	24589208	24594094	+	TIR-NBS-LRR	manual	1418	LRR_4	PF12799.8	43	0.1	88.3721	825	864
VITMroTrayshed_v2.0.hap2.chr18.ver2.1.g475691.t01	VITMroTrayshed_v2.1.hap2.chr18	24589208	24594094	+	TIR-NBS-LRR	manual	1418	LRR_8	PF13855.7	61	0.17	65.5738	866	904
VITMroTrayshed_v2.0.hap2.chr18.ver2.1.g475691.t01	VITMroTrayshed_v2.1.hap2.chr18	24589208	24594094	+	TIR-NBS-LRR	manual	1418	LRR_8	PF13855.7	61	0.056	60.6557	916	951
VITMroTrayshed_v2.0.hap2.chr18.ver2.1.g475691.t01	VITMroTrayshed_v2.1.hap2.chr18	24589208	24594094	+	TIR-NBS-LRR	manual	1418	LRR_4	PF12799.8	43	0.0019	93.0233	920	961
VITMroTrayshed_v2.0.hap2.chr18.ver2.1.g475691.t01	VITMroTrayshed_v2.1.hap2.chr18	24589208	24594094	+	TIR-NBS-LRR	manual	1418	LRR_8	PF13855.7	61	0.14	63.9344	962	999
VITMroTrayshed_v2.0.hap2.chr18.ver2.1.g475691.t01	VITMroTrayshed_v2.1.hap2.chr18	24589208	24594094	+	TIR-NBS-LRR	manual	1418	LRR_4	PF12799.8	43	1	93.0233	966	1007
VITMroTrayshed_v2.0.hap2.chr18.ver2.1.g475691.t01	VITMroTrayshed_v2.1.hap2.chr18	24589208	24594094	+	TIR-NBS-LRR	manual	1418	LRR_8	PF13855.7	61	0.36	95.082	966	1021
VITMroTrayshed_v2.0.hap2.chr18.ver2.1.g475691.t01	VITMroTrayshed_v2.1.hap2.chr18	24589208	24594094	+	TIR-NBS-LRR	manual	1418	LRR_4	PF12799.8	43	0.014	95.3488	988	1030
VITMroTrayshed_v2.0.hap2.chr18.ver2.1.g475691.t01	VITMroTrayshed_v2.1.hap2.chr18	24589208	24594094	+	TIR-NBS-LRR	manual	1418	LRR_8	PF13855.7	61	0.22	91.8033	1012	1066
VITMroTrayshed_v2.0.hap2.chr18.ver2.1.g475691.t01	VITMroTrayshed_v2.1.hap2.chr18	24589208	24594094	+	TIR-NBS-LRR	manual	1418	LRR_4	PF12799.8	43	0.69	93.0233	1036	1081
VITMroTrayshed_v2.0.hap2.chr18.ver2.1.g475691.t01	VITMroTrayshed_v2.1.hap2.chr18	24589208	24594094	+	TIR-NBS-LRR	manual	1418	LRR_8	PF13855.7	61	0.037	57.377	1133	1166
VITMroTrayshed_v2.0.hap2.chr18.ver2.1.g475691.t01	VITMroTrayshed_v2.1.hap2.chr18	24589208	24594094	+	TIR-NBS-LRR	manual	1418	LRR_4	PF12799.8	43	0.062	93.0233	1134	1175
VITMroTrayshed_v2.0.hap2.chr18.ver2.1.g475810.t01	VITMroTrayshed_v2.1.hap2.chr18	24699196	24718159	-	NBS-LRR	manual	1881	NB-ARC	PF00931.23	252	1.1e-24	88.4921	30	249
VITMroTrayshed_v2.0.hap2.chr18.ver2.1.g475810.t01	VITMroTrayshed_v2.1.hap2.chr18	24699196	24718159	-	NBS-LRR	manual	1881	LRR_3	PF07725.13	20	0.1	90	438	455
VITMroTrayshed_v2.0.hap2.chr18.ver2.1.g475810.t01	VITMroTrayshed_v2.1.hap2.chr18	24699196	24718159	-	NBS-LRR	manual	1881	LRR_4	PF12799.8	43	0.76	90.6977	483	524
VITMroTrayshed_v2.0.hap2.chr18.ver2.1.g475810.t01	VITMroTrayshed_v2.1.hap2.chr18	24699196	24718159	-	NBS-LRR	manual	1881	LRR_4	PF12799.8	43	0.58	86.0465	699	730
VITMroTrayshed_v2.0.hap2.chr18.ver2.1.g475810.t01	VITMroTrayshed_v2.1.hap2.chr18	24699196	24718159	-	NBS-LRR	manual	1881	LRR_8	PF13855.7	61	0.017	70.4918	1024	1065
VITMroTrayshed_v2.0.hap2.chr18.ver2.1.g475810.t01	VITMroTrayshed_v2.1.hap2.chr18	24699196	24718159	-	NBS-LRR	manual	1881	LRR_4	PF12799.8	43	0.006	86.0465	1033	1071
VITMroTrayshed_v2.0.hap2.chr18.ver2.1.g475810.t01	VITMroTrayshed_v2.1.hap2.chr18	24699196	24718159	-	NBS-LRR	manual	1881	LRR_8	PF13855.7	61	0.47	95.082	1154	1211
VITMroTrayshed_v2.0.hap2.chr18.ver2.1.g475810.t01	VITMroTrayshed_v2.1.hap2.chr18	24699196	24718159	-	NBS-LRR	manual	1881	LRR_4	PF12799.8	43	0.76	81.3953	1463	1500
VITMroTrayshed_v2.0.hap2.chr18.ver2.1.g475810.t01	VITMroTrayshed_v2.1.hap2.chr18	24699196	24718159	-	NBS-LRR	manual	1881	LRR_4	PF12799.8	43	0.018	95.3488	1482	1521
VITMroTrayshed_v2.0.hap2.chr18.ver2.1.g475810.t01	VITMroTrayshed_v2.1.hap2.chr18	24699196	24718159	-	NBS-LRR	manual	1881	LRR_8	PF13855.7	61	0.012	68.8525	1499	1539
VITMroTrayshed_v2.0.hap2.chr18.ver2.1.g475810.t01	VITMroTrayshed_v2.1.hap2.chr18	24699196	24718159	-	NBS-LRR	manual	1881	LRR_4	PF12799.8	43	0.068	88.3721	1507	1546
VITMroTrayshed_v2.0.hap2.chr18.ver2.1.g475810.t01	VITMroTrayshed_v2.1.hap2.chr18	24699196	24718159	-	NBS-LRR	manual	1881	LRR_8	PF13855.7	61	0.00052	95.082	1507	1563
VITMroTrayshed_v2.0.hap2.chr18.ver2.1.g475810.t01	VITMroTrayshed_v2.1.hap2.chr18	24699196	24718159	-	NBS-LRR	manual	1881	LRR_4	PF12799.8	43	0.076	88.3721	1530	1570
VITMroTrayshed_v2.0.hap2.chr18.ver2.1.g475810.t01	VITMroTrayshed_v2.1.hap2.chr18	24699196	24718159	-	NBS-LRR	manual	1881	LRR_4	PF12799.8	43	0.5	88.3721	1606	1643
VITMroTrayshed_v2.0.hap2.chr18.ver2.1.g475812.t01	VITMroTrayshed_v2.1.hap2.chr18	24726703	24742311	-	TIR-NBS-LRR	manual	1441	TIR	PF01582.21	176	6.5e-50	87.5	21	182
VITMroTrayshed_v2.0.hap2.chr18.ver2.1.g475812.t01	VITMroTrayshed_v2.1.hap2.chr18	24726703	24742311	-	TIR-NBS-LRR	manual	1441	TIR_2	PF13676.7	121	7.7e-16	80.9917	23	119
VITMroTrayshed_v2.0.hap2.chr18.ver2.1.g475812.t01	VITMroTrayshed_v2.1.hap2.chr18	24726703	24742311	-	TIR-NBS-LRR	manual	1441	NB-ARC	PF00931.23	252	1.6e-29	88.8889	202	420
VITMroTrayshed_v2.0.hap2.chr18.ver2.1.g475812.t01	VITMroTrayshed_v2.1.hap2.chr18	24726703	24742311	-	TIR-NBS-LRR	manual	1441	LRR_3	PF07725.13	20	0.0064	90	610	627
VITMroTrayshed_v2.0.hap2.chr18.ver2.1.g475812.t01	VITMroTrayshed_v2.1.hap2.chr18	24726703	24742311	-	TIR-NBS-LRR	manual	1441	LRR_4	PF12799.8	43	0.045	90.6977	654	695
VITMroTrayshed_v2.0.hap2.chr18.ver2.1.g475812.t01	VITMroTrayshed_v2.1.hap2.chr18	24726703	24742311	-	TIR-NBS-LRR	manual	1441	LRR_4	PF12799.8	43	0.8	95.3488	703	742
VITMroTrayshed_v2.0.hap2.chr18.ver2.1.g475812.t01	VITMroTrayshed_v2.1.hap2.chr18	24726703	24742311	-	TIR-NBS-LRR	manual	1441	LRR_8	PF13855.7	61	0.36	95.082	703	759
VITMroTrayshed_v2.0.hap2.chr18.ver2.1.g475812.t01	VITMroTrayshed_v2.1.hap2.chr18	24726703	24742311	-	TIR-NBS-LRR	manual	1441	LRR_4	PF12799.8	43	0.01	95.3488	844	893
VITMroTrayshed_v2.0.hap2.chr18.ver2.1.g475812.t01	VITMroTrayshed_v2.1.hap2.chr18	24726703	24742311	-	TIR-NBS-LRR	manual	1441	LRR_8	PF13855.7	61	0.00093	95.082	1188	1244
VITMroTrayshed_v2.0.hap2.chr18.ver2.1.g475812.t01	VITMroTrayshed_v2.1.hap2.chr18	24726703	24742311	-	TIR-NBS-LRR	manual	1441	LRR_4	PF12799.8	43	0.0043	86.0465	1211	1249
VITMroTrayshed_v2.0.hap2.chr18.ver2.1.g475812.t01	VITMroTrayshed_v2.1.hap2.chr18	24726703	24742311	-	TIR-NBS-LRR	manual	1441	LRR_8	PF13855.7	61	0.035	91.8033	1335	1390
VITMroTrayshed_v2.0.hap2.chr18.ver2.1.g475881.t01	VITMroTrayshed_v2.1.hap2.chr18	24834931	24835701	+	NBS	manual	256	NB-ARC	PF00931.23	252	2.2e-27	83.3333	2	208
VITMroTrayshed_v2.0.hap2.chr18.ver2.1.g475882.t01	VITMroTrayshed_v2.1.hap2.chr18	24849998	24857161	+	TIR-NBS-LRR	manual	1353	TIR	PF01582.21	176	7.3e-49	90.9091	20	184
VITMroTrayshed_v2.0.hap2.chr18.ver2.1.g475882.t01	VITMroTrayshed_v2.1.hap2.chr18	24849998	24857161	+	TIR-NBS-LRR	manual	1353	TIR_2	PF13676.7	121	2.6e-13	80.9917	23	118
VITMroTrayshed_v2.0.hap2.chr18.ver2.1.g475882.t01	VITMroTrayshed_v2.1.hap2.chr18	24849998	24857161	+	TIR-NBS-LRR	manual	1353	NB-ARC	PF00931.23	252	2.3e-27	88.4921	208	426
VITMroTrayshed_v2.0.hap2.chr18.ver2.1.g475882.t01	VITMroTrayshed_v2.1.hap2.chr18	24849998	24857161	+	TIR-NBS-LRR	manual	1353	LRR_3	PF07725.13	20	0.12	100	619	638
VITMroTrayshed_v2.0.hap2.chr18.ver2.1.g475882.t01	VITMroTrayshed_v2.1.hap2.chr18	24849998	24857161	+	TIR-NBS-LRR	manual	1353	LRR_4	PF12799.8	43	0.041	72.093	643	674
VITMroTrayshed_v2.0.hap2.chr18.ver2.1.g475882.t01	VITMroTrayshed_v2.1.hap2.chr18	24849998	24857161	+	TIR-NBS-LRR	manual	1353	LRR_8	PF13855.7	61	0.31	73.7705	681	724
VITMroTrayshed_v2.0.hap2.chr18.ver2.1.g475882.t01	VITMroTrayshed_v2.1.hap2.chr18	24849998	24857161	+	TIR-NBS-LRR	manual	1353	LRR_4	PF12799.8	43	0.067	88.3721	693	732
VITMroTrayshed_v2.0.hap2.chr18.ver2.1.g475882.t01	VITMroTrayshed_v2.1.hap2.chr18	24849998	24857161	+	TIR-NBS-LRR	manual	1353	LRR_4	PF12799.8	43	0.041	88.3721	715	754
VITMroTrayshed_v2.0.hap2.chr18.ver2.1.g475882.t01	VITMroTrayshed_v2.1.hap2.chr18	24849998	24857161	+	TIR-NBS-LRR	manual	1353	LRR_8	PF13855.7	61	0.00068	63.9344	736	773
VITMroTrayshed_v2.0.hap2.chr18.ver2.1.g475882.t01	VITMroTrayshed_v2.1.hap2.chr18	24849998	24857161	+	TIR-NBS-LRR	manual	1353	LRR_4	PF12799.8	43	0.0071	86.0465	739	776
VITMroTrayshed_v2.0.hap2.chr18.ver2.1.g475882.t01	VITMroTrayshed_v2.1.hap2.chr18	24849998	24857161	+	TIR-NBS-LRR	manual	1353	LRR_4	PF12799.8	43	0.015	86.0465	763	800
VITMroTrayshed_v2.0.hap2.chr18.ver2.1.g475882.t01	VITMroTrayshed_v2.1.hap2.chr18	24849998	24857161	+	TIR-NBS-LRR	manual	1353	LRR_8	PF13855.7	61	1.3e-07	98.3607	785	842
VITMroTrayshed_v2.0.hap2.chr18.ver2.1.g475882.t01	VITMroTrayshed_v2.1.hap2.chr18	24849998	24857161	+	TIR-NBS-LRR	manual	1353	LRR_4	PF12799.8	43	0.002	86.0465	809	846
VITMroTrayshed_v2.0.hap2.chr18.ver2.1.g475882.t01	VITMroTrayshed_v2.1.hap2.chr18	24849998	24857161	+	TIR-NBS-LRR	manual	1353	LRR_8	PF13855.7	61	0.00032	90.1639	831	883
VITMroTrayshed_v2.0.hap2.chr18.ver2.1.g475882.t01	VITMroTrayshed_v2.1.hap2.chr18	24849998	24857161	+	TIR-NBS-LRR	manual	1353	LRR_4	PF12799.8	43	0.035	90.6977	855	895
VITMroTrayshed_v2.0.hap2.chr18.ver2.1.g475882.t01	VITMroTrayshed_v2.1.hap2.chr18	24849998	24857161	+	TIR-NBS-LRR	manual	1353	LRR_8	PF13855.7	61	0.0095	67.2131	965	1004
VITMroTrayshed_v2.0.hap2.chr18.ver2.1.g475882.t01	VITMroTrayshed_v2.1.hap2.chr18	24849998	24857161	+	TIR-NBS-LRR	manual	1353	LRR_4	PF12799.8	43	0.28	86.0465	972	1010
VITMroTrayshed_v2.0.hap2.chr18.ver2.1.g475882.t01	VITMroTrayshed_v2.1.hap2.chr18	24849998	24857161	+	TIR-NBS-LRR	manual	1353	LRR_8	PF13855.7	61	0.006	96.7213	1020	1080
VITMroTrayshed_v2.0.hap2.chr18.ver2.1.g475882.t01	VITMroTrayshed_v2.1.hap2.chr18	24849998	24857161	+	TIR-NBS-LRR	manual	1353	LRR_8	PF13855.7	61	0.0077	60.6557	1067	1102
VITMroTrayshed_v2.0.hap2.chr18.ver2.1.g475882.t01	VITMroTrayshed_v2.1.hap2.chr18	24849998	24857161	+	TIR-NBS-LRR	manual	1353	LRR_4	PF12799.8	43	0.022	95.3488	1069	1111
VITMroTrayshed_v2.0.hap2.chr18.ver2.1.g475900.t01	VITMroTrayshed_v2.1.hap2.chr18	24886616	24893772	+	TIR-NBS-LRR	manual	1311	TIR	PF01582.21	176	2.6e-49	90.3409	20	186
VITMroTrayshed_v2.0.hap2.chr18.ver2.1.g475900.t01	VITMroTrayshed_v2.1.hap2.chr18	24886616	24893772	+	TIR-NBS-LRR	manual	1311	TIR_2	PF13676.7	121	6.5e-15	80.9917	23	118
VITMroTrayshed_v2.0.hap2.chr18.ver2.1.g475900.t01	VITMroTrayshed_v2.1.hap2.chr18	24886616	24893772	+	TIR-NBS-LRR	manual	1311	NB-ARC	PF00931.23	252	6.3e-30	86.9048	211	426
VITMroTrayshed_v2.0.hap2.chr18.ver2.1.g475900.t01	VITMroTrayshed_v2.1.hap2.chr18	24886616	24893772	+	TIR-NBS-LRR	manual	1311	LRR_3	PF07725.13	20	0.0028	90	615	632
VITMroTrayshed_v2.0.hap2.chr18.ver2.1.g475900.t01	VITMroTrayshed_v2.1.hap2.chr18	24886616	24893772	+	TIR-NBS-LRR	manual	1311	LRR_8	PF13855.7	61	0.029	63.9344	724	761
VITMroTrayshed_v2.0.hap2.chr18.ver2.1.g475900.t01	VITMroTrayshed_v2.1.hap2.chr18	24886616	24893772	+	TIR-NBS-LRR	manual	1311	LRR_8	PF13855.7	61	0.0022	77.0492	767	811
VITMroTrayshed_v2.0.hap2.chr18.ver2.1.g475900.t01	VITMroTrayshed_v2.1.hap2.chr18	24886616	24893772	+	TIR-NBS-LRR	manual	1311	LRR_4	PF12799.8	43	0.2	88.3721	825	864
VITMroTrayshed_v2.0.hap2.chr18.ver2.1.g475900.t01	VITMroTrayshed_v2.1.hap2.chr18	24886616	24893772	+	TIR-NBS-LRR	manual	1311	LRR_8	PF13855.7	61	0.0005	95.082	825	881
VITMroTrayshed_v2.0.hap2.chr18.ver2.1.g475900.t01	VITMroTrayshed_v2.1.hap2.chr18	24886616	24893772	+	TIR-NBS-LRR	manual	1311	LRR_4	PF12799.8	43	0.087	88.3721	847	887
VITMroTrayshed_v2.0.hap2.chr18.ver2.1.g475900.t01	VITMroTrayshed_v2.1.hap2.chr18	24886616	24893772	+	TIR-NBS-LRR	manual	1311	LRR_8	PF13855.7	61	0.015	62.2951	892	928
VITMroTrayshed_v2.0.hap2.chr18.ver2.1.g475900.t01	VITMroTrayshed_v2.1.hap2.chr18	24886616	24893772	+	TIR-NBS-LRR	manual	1311	LRR_4	PF12799.8	43	0.0045	86.0465	896	934
VITMroTrayshed_v2.0.hap2.chr18.ver2.1.g475900.t01	VITMroTrayshed_v2.1.hap2.chr18	24886616	24893772	+	TIR-NBS-LRR	manual	1311	LRR_4	PF12799.8	43	0.048	95.3488	993	1035
VITMroTrayshed_v2.0.hap2.chr18.ver2.1.g475971.t01	VITMroTrayshed_v2.1.hap2.chr18	25031459	25032432	-	NBS	manual	279	NB-ARC	PF00931.23	252	5.1e-22	57.1429	1	142
VITMroTrayshed_v2.0.hap2.chr18.ver2.0.g476000.t01	VITMroTrayshed_v2.1.hap2.chr18	25115553	25120506	-	TIR-NBS-LRR	EVM	1119	TIR	PF01582.21	176	5e-38	88.6364	20	182
VITMroTrayshed_v2.0.hap2.chr18.ver2.0.g476000.t01	VITMroTrayshed_v2.1.hap2.chr18	25115553	25120506	-	TIR-NBS-LRR	EVM	1119	TIR_2	PF13676.7	121	4.2e-15	86.7769	22	128
VITMroTrayshed_v2.0.hap2.chr18.ver2.0.g476000.t01	VITMroTrayshed_v2.1.hap2.chr18	25115553	25120506	-	TIR-NBS-LRR	EVM	1119	NB-ARC	PF00931.23	252	1e-25	88.8889	216	438
VITMroTrayshed_v2.0.hap2.chr18.ver2.0.g476000.t01	VITMroTrayshed_v2.1.hap2.chr18	25115553	25120506	-	TIR-NBS-LRR	EVM	1119	LRR_3	PF07725.13	20	0.18	95	609	627
VITMroTrayshed_v2.0.hap2.chr18.ver2.0.g476000.t01	VITMroTrayshed_v2.1.hap2.chr18	25115553	25120506	-	TIR-NBS-LRR	EVM	1119	LRR_8	PF13855.7	61	0.21	91.8033	632	686
VITMroTrayshed_v2.0.hap2.chr18.ver2.0.g476000.t01	VITMroTrayshed_v2.1.hap2.chr18	25115553	25120506	-	TIR-NBS-LRR	EVM	1119	LRR_4	PF12799.8	43	0.54	90.6977	654	695
VITMroTrayshed_v2.0.hap2.chr18.ver2.0.g476000.t01	VITMroTrayshed_v2.1.hap2.chr18	25115553	25120506	-	TIR-NBS-LRR	EVM	1119	LRR_8	PF13855.7	61	0.00039	62.2951	699	735
VITMroTrayshed_v2.0.hap2.chr18.ver2.0.g476000.t01	VITMroTrayshed_v2.1.hap2.chr18	25115553	25120506	-	TIR-NBS-LRR	EVM	1119	LRR_4	PF12799.8	43	0.0043	81.3953	702	738
VITMroTrayshed_v2.0.hap2.chr18.ver2.0.g476000.t01	VITMroTrayshed_v2.1.hap2.chr18	25115553	25120506	-	TIR-NBS-LRR	EVM	1119	LRR_8	PF13855.7	61	5.7e-05	91.8033	750	804
VITMroTrayshed_v2.0.hap2.chr18.ver2.0.g476000.t01	VITMroTrayshed_v2.1.hap2.chr18	25115553	25120506	-	TIR-NBS-LRR	EVM	1119	LRR_4	PF12799.8	43	0.00011	86.0465	774	812
VITMroTrayshed_v2.0.hap2.chr18.ver2.0.g476000.t01	VITMroTrayshed_v2.1.hap2.chr18	25115553	25120506	-	TIR-NBS-LRR	EVM	1119	LRR_8	PF13855.7	61	3.1e-05	90.1639	774	827
VITMroTrayshed_v2.0.hap2.chr18.ver2.0.g476000.t01	VITMroTrayshed_v2.1.hap2.chr18	25115553	25120506	-	TIR-NBS-LRR	EVM	1119	LRR_4	PF12799.8	43	0.92	83.7209	798	836
VITMroTrayshed_v2.0.hap2.chr18.ver2.0.g476000.t01	VITMroTrayshed_v2.1.hap2.chr18	25115553	25120506	-	TIR-NBS-LRR	EVM	1119	LRR_4	PF12799.8	43	2e-05	90.6977	844	884
VITMroTrayshed_v2.0.hap2.chr18.ver2.0.g476000.t01	VITMroTrayshed_v2.1.hap2.chr18	25115553	25120506	-	TIR-NBS-LRR	EVM	1119	LRR_8	PF13855.7	61	1.2e-06	95.082	845	901
VITMroTrayshed_v2.0.hap2.chr18.ver2.0.g476000.t01	VITMroTrayshed_v2.1.hap2.chr18	25115553	25120506	-	TIR-NBS-LRR	EVM	1119	LRR_4	PF12799.8	43	0.0012	86.0465	892	930
VITMroTrayshed_v2.0.hap2.chr18.ver2.0.g476000.t01	VITMroTrayshed_v2.1.hap2.chr18	25115553	25120506	-	TIR-NBS-LRR	EVM	1119	LRR_8	PF13855.7	61	6.5e-05	96.7213	892	949
VITMroTrayshed_v2.0.hap2.chr18.ver2.0.g476000.t01	VITMroTrayshed_v2.1.hap2.chr18	25115553	25120506	-	TIR-NBS-LRR	EVM	1119	LRR_8	PF13855.7	61	0.0002	93.4426	916	971
VITMroTrayshed_v2.0.hap2.chr18.ver2.0.g476000.t01	VITMroTrayshed_v2.1.hap2.chr18	25115553	25120506	-	TIR-NBS-LRR	EVM	1119	LRR_4	PF12799.8	43	0.14	74.4186	939	972
VITMroTrayshed_v2.0.hap2.chr18.ver2.0.g476010.t01	VITMroTrayshed_v2.1.hap2.chr18	25137524	25144183	-	TIR-NBS-LRR	.	1678	TIR	PF01582.21	176	6.8e-44	91.4773	97	261
VITMroTrayshed_v2.0.hap2.chr18.ver2.0.g476010.t01	VITMroTrayshed_v2.1.hap2.chr18	25137524	25144183	-	TIR-NBS-LRR	.	1678	TIR_2	PF13676.7	121	1.5e-11	81.8182	99	197
VITMroTrayshed_v2.0.hap2.chr18.ver2.0.g476010.t01	VITMroTrayshed_v2.1.hap2.chr18	25137524	25144183	-	TIR-NBS-LRR	.	1678	NB-ARC	PF00931.23	252	6.8e-23	88.8889	289	502
VITMroTrayshed_v2.0.hap2.chr18.ver2.0.g476010.t01	VITMroTrayshed_v2.1.hap2.chr18	25137524	25144183	-	TIR-NBS-LRR	.	1678	LRR_3	PF07725.13	20	0.0074	90	680	697
VITMroTrayshed_v2.0.hap2.chr18.ver2.0.g476010.t01	VITMroTrayshed_v2.1.hap2.chr18	25137524	25144183	-	TIR-NBS-LRR	.	1678	LRR_8	PF13855.7	61	0.0016	95.082	680	735
VITMroTrayshed_v2.0.hap2.chr18.ver2.0.g476010.t01	VITMroTrayshed_v2.1.hap2.chr18	25137524	25144183	-	TIR-NBS-LRR	.	1678	LRR_4	PF12799.8	43	0.24	76.7442	703	737
VITMroTrayshed_v2.0.hap2.chr18.ver2.0.g476010.t01	VITMroTrayshed_v2.1.hap2.chr18	25137524	25144183	-	TIR-NBS-LRR	.	1678	LRR_4	PF12799.8	43	0.045	83.7209	750	787
VITMroTrayshed_v2.0.hap2.chr18.ver2.0.g476010.t01	VITMroTrayshed_v2.1.hap2.chr18	25137524	25144183	-	TIR-NBS-LRR	.	1678	LRR_8	PF13855.7	61	0.41	59.0164	794	828
VITMroTrayshed_v2.0.hap2.chr18.ver2.0.g476010.t01	VITMroTrayshed_v2.1.hap2.chr18	25137524	25144183	-	TIR-NBS-LRR	.	1678	LRR_4	PF12799.8	43	0.1	86.0465	797	835
VITMroTrayshed_v2.0.hap2.chr18.ver2.0.g476010.t01	VITMroTrayshed_v2.1.hap2.chr18	25137524	25144183	-	TIR-NBS-LRR	.	1678	LRR_8	PF13855.7	61	0.28	62.2951	840	876
VITMroTrayshed_v2.0.hap2.chr18.ver2.0.g476010.t01	VITMroTrayshed_v2.1.hap2.chr18	25137524	25144183	-	TIR-NBS-LRR	.	1678	LRR_4	PF12799.8	43	0.032	90.6977	845	882
VITMroTrayshed_v2.0.hap2.chr18.ver2.0.g476010.t01	VITMroTrayshed_v2.1.hap2.chr18	25137524	25144183	-	TIR-NBS-LRR	.	1678	LRR_8	PF13855.7	61	0.011	95.082	891	947
VITMroTrayshed_v2.0.hap2.chr18.ver2.0.g476010.t01	VITMroTrayshed_v2.1.hap2.chr18	25137524	25144183	-	TIR-NBS-LRR	.	1678	LRR_4	PF12799.8	43	0.0042	83.7209	916	953
VITMroTrayshed_v2.0.hap2.chr18.ver2.0.g476010.t01	VITMroTrayshed_v2.1.hap2.chr18	25137524	25144183	-	TIR-NBS-LRR	.	1678	LRR_8	PF13855.7	61	0.15	80.3279	948	995
VITMroTrayshed_v2.0.hap2.chr18.ver2.0.g476010.t01	VITMroTrayshed_v2.1.hap2.chr18	25137524	25144183	-	TIR-NBS-LRR	.	1678	LRR_4	PF12799.8	43	0.0059	93.0233	961	1000
VITMroTrayshed_v2.0.hap2.chr18.ver2.0.g476010.t01	VITMroTrayshed_v2.1.hap2.chr18	25137524	25144183	-	TIR-NBS-LRR	.	1678	LRR_8	PF13855.7	61	0.012	95.082	962	1019
VITMroTrayshed_v2.0.hap2.chr18.ver2.0.g476010.t01	VITMroTrayshed_v2.1.hap2.chr18	25137524	25144183	-	TIR-NBS-LRR	.	1678	LRR_4	PF12799.8	43	0.014	88.3721	985	1025
VITMroTrayshed_v2.0.hap2.chr18.ver2.0.g476010.t01	VITMroTrayshed_v2.1.hap2.chr18	25137524	25144183	-	TIR-NBS-LRR	.	1678	LRR_8	PF13855.7	61	0.11	95.082	1010	1066
VITMroTrayshed_v2.0.hap2.chr18.ver2.0.g476010.t01	VITMroTrayshed_v2.1.hap2.chr18	25137524	25144183	-	TIR-NBS-LRR	.	1678	LRR_4	PF12799.8	43	0.14	83.7209	1035	1072
VITMroTrayshed_v2.0.hap2.chr18.ver2.0.g476010.t01	VITMroTrayshed_v2.1.hap2.chr18	25137524	25144183	-	TIR-NBS-LRR	.	1678	LRR_4	PF12799.8	43	0.16	88.3721	1056	1096
VITMroTrayshed_v2.0.hap2.chr18.ver2.0.g476010.t01	VITMroTrayshed_v2.1.hap2.chr18	25137524	25144183	-	TIR-NBS-LRR	.	1678	LRR_8	PF13855.7	61	0.21	80.3279	1067	1114
VITMroTrayshed_v2.0.hap2.chr18.ver2.0.g476010.t01	VITMroTrayshed_v2.1.hap2.chr18	25137524	25144183	-	TIR-NBS-LRR	.	1678	LRR_4	PF12799.8	43	0.006	93.0233	1080	1119
VITMroTrayshed_v2.0.hap2.chr18.ver2.0.g476010.t01	VITMroTrayshed_v2.1.hap2.chr18	25137524	25144183	-	TIR-NBS-LRR	.	1678	LRR_8	PF13855.7	61	0.017	95.082	1081	1138
VITMroTrayshed_v2.0.hap2.chr18.ver2.0.g476010.t01	VITMroTrayshed_v2.1.hap2.chr18	25137524	25144183	-	TIR-NBS-LRR	.	1678	LRR_4	PF12799.8	43	0.014	88.3721	1104	1144
VITMroTrayshed_v2.0.hap2.chr18.ver2.0.g476010.t01	VITMroTrayshed_v2.1.hap2.chr18	25137524	25144183	-	TIR-NBS-LRR	.	1678	LRR_8	PF13855.7	61	0.11	95.082	1129	1185
VITMroTrayshed_v2.0.hap2.chr18.ver2.0.g476010.t01	VITMroTrayshed_v2.1.hap2.chr18	25137524	25144183	-	TIR-NBS-LRR	.	1678	LRR_4	PF12799.8	43	0.0065	83.7209	1154	1191
VITMroTrayshed_v2.0.hap2.chr18.ver2.0.g476010.t01	VITMroTrayshed_v2.1.hap2.chr18	25137524	25144183	-	TIR-NBS-LRR	.	1678	LRR_8	PF13855.7	61	0.92	62.2951	1196	1232
VITMroTrayshed_v2.0.hap2.chr18.ver2.0.g476010.t01	VITMroTrayshed_v2.1.hap2.chr18	25137524	25144183	-	TIR-NBS-LRR	.	1678	LRR_4	PF12799.8	43	0.35	83.7209	1201	1238
VITMroTrayshed_v2.0.hap2.chr18.ver2.0.g476010.t01	VITMroTrayshed_v2.1.hap2.chr18	25137524	25144183	-	TIR-NBS-LRR	.	1678	LRR_8	PF13855.7	61	0.47	70.4918	1239	1280
VITMroTrayshed_v2.0.hap2.chr18.ver2.0.g476010.t01	VITMroTrayshed_v2.1.hap2.chr18	25137524	25144183	-	TIR-NBS-LRR	.	1678	LRR_4	PF12799.8	43	0.024	95.3488	1246	1286
VITMroTrayshed_v2.0.hap2.chr18.ver2.0.g476010.t01	VITMroTrayshed_v2.1.hap2.chr18	25137524	25144183	-	TIR-NBS-LRR	.	1678	LRR_8	PF13855.7	61	0.55	95.082	1247	1304
VITMroTrayshed_v2.0.hap2.chr18.ver2.0.g476010.t01	VITMroTrayshed_v2.1.hap2.chr18	25137524	25144183	-	TIR-NBS-LRR	.	1678	LRR_8	PF13855.7	61	0.38	96.7213	1296	1356
VITMroTrayshed_v2.0.hap2.chr18.ver2.0.g476010.t01	VITMroTrayshed_v2.1.hap2.chr18	25137524	25144183	-	TIR-NBS-LRR	.	1678	LRR_4	PF12799.8	43	0.0023	95.3488	1345	1387
VITMroTrayshed_v2.0.hap2.chr18.ver2.1.g476021.t01	VITMroTrayshed_v2.1.hap2.chr18	25179505	25186422	-	TIR-NBS-LRR	manual	1367	TIR	PF01582.21	176	2.8e-44	91.4773	20	187
VITMroTrayshed_v2.0.hap2.chr18.ver2.1.g476021.t01	VITMroTrayshed_v2.1.hap2.chr18	25179505	25186422	-	TIR-NBS-LRR	manual	1367	TIR_2	PF13676.7	121	9.5e-17	80.9917	23	119
VITMroTrayshed_v2.0.hap2.chr18.ver2.1.g476021.t01	VITMroTrayshed_v2.1.hap2.chr18	25179505	25186422	-	TIR-NBS-LRR	manual	1367	NB-ARC	PF00931.23	252	1.9e-28	92.0635	210	437
VITMroTrayshed_v2.0.hap2.chr18.ver2.1.g476021.t01	VITMroTrayshed_v2.1.hap2.chr18	25179505	25186422	-	TIR-NBS-LRR	manual	1367	LRR_3	PF07725.13	20	0.0015	95	607	625
VITMroTrayshed_v2.0.hap2.chr18.ver2.1.g476021.t01	VITMroTrayshed_v2.1.hap2.chr18	25179505	25186422	-	TIR-NBS-LRR	manual	1367	LRR_8	PF13855.7	61	0.24	95.082	607	662
VITMroTrayshed_v2.0.hap2.chr18.ver2.1.g476021.t01	VITMroTrayshed_v2.1.hap2.chr18	25179505	25186422	-	TIR-NBS-LRR	manual	1367	LRR_4	PF12799.8	43	6.2e-05	88.3721	701	740
VITMroTrayshed_v2.0.hap2.chr18.ver2.1.g476021.t01	VITMroTrayshed_v2.1.hap2.chr18	25179505	25186422	-	TIR-NBS-LRR	manual	1367	LRR_8	PF13855.7	61	4.6e-06	95.082	701	757
VITMroTrayshed_v2.0.hap2.chr18.ver2.1.g476021.t01	VITMroTrayshed_v2.1.hap2.chr18	25179505	25186422	-	TIR-NBS-LRR	manual	1367	LRR_4	PF12799.8	43	0.043	86.0465	748	786
VITMroTrayshed_v2.0.hap2.chr18.ver2.1.g476021.t01	VITMroTrayshed_v2.1.hap2.chr18	25179505	25186422	-	TIR-NBS-LRR	manual	1367	LRR_8	PF13855.7	61	9.7e-06	95.082	772	828
VITMroTrayshed_v2.0.hap2.chr18.ver2.1.g476021.t01	VITMroTrayshed_v2.1.hap2.chr18	25179505	25186422	-	TIR-NBS-LRR	manual	1367	LRR_4	PF12799.8	43	0.95	88.3721	795	835
VITMroTrayshed_v2.0.hap2.chr18.ver2.1.g476021.t01	VITMroTrayshed_v2.1.hap2.chr18	25179505	25186422	-	TIR-NBS-LRR	manual	1367	LRR_4	PF12799.8	43	0.009	88.3721	843	882
VITMroTrayshed_v2.0.hap2.chr18.ver2.1.g476021.t01	VITMroTrayshed_v2.1.hap2.chr18	25179505	25186422	-	TIR-NBS-LRR	manual	1367	LRR_8	PF13855.7	61	8.5e-05	98.3607	843	901
VITMroTrayshed_v2.0.hap2.chr18.ver2.1.g476021.t01	VITMroTrayshed_v2.1.hap2.chr18	25179505	25186422	-	TIR-NBS-LRR	manual	1367	LRR_4	PF12799.8	43	0.81	93.0233	866	910
VITMroTrayshed_v2.0.hap2.chr18.ver2.1.g476021.t01	VITMroTrayshed_v2.1.hap2.chr18	25179505	25186422	-	TIR-NBS-LRR	manual	1367	LRR_8	PF13855.7	61	0.05	70.4918	912	954
VITMroTrayshed_v2.0.hap2.chr18.ver2.1.g476021.t01	VITMroTrayshed_v2.1.hap2.chr18	25179505	25186422	-	TIR-NBS-LRR	manual	1367	LRR_8	PF13855.7	61	1	63.9344	965	1003
VITMroTrayshed_v2.0.hap2.chr18.ver2.1.g476021.t01	VITMroTrayshed_v2.1.hap2.chr18	25179505	25186422	-	TIR-NBS-LRR	manual	1367	LRR_4	PF12799.8	43	0.67	86.0465	996	1034
VITMroTrayshed_v2.0.hap2.chr18.ver2.1.g476021.t01	VITMroTrayshed_v2.1.hap2.chr18	25179505	25186422	-	TIR-NBS-LRR	manual	1367	LRR_4	PF12799.8	43	0.00085	90.6977	1020	1060
VITMroTrayshed_v2.0.hap2.chr18.ver2.1.g476021.t01	VITMroTrayshed_v2.1.hap2.chr18	25179505	25186422	-	TIR-NBS-LRR	manual	1367	LRR_8	PF13855.7	61	0.00012	91.8033	1020	1074
VITMroTrayshed_v2.0.hap2.chr18.ver2.1.g476021.t01	VITMroTrayshed_v2.1.hap2.chr18	25179505	25186422	-	TIR-NBS-LRR	manual	1367	LRR_4	PF12799.8	43	0.023	74.4186	1091	1122
VITMroTrayshed_v2.0.hap2.chr18.ver2.1.g476021.t01	VITMroTrayshed_v2.1.hap2.chr18	25179505	25186422	-	TIR-NBS-LRR	manual	1367	LRR_8	PF13855.7	61	0.00023	93.4426	1091	1146
VITMroTrayshed_v2.0.hap2.chr18.ver2.1.g476021.t01	VITMroTrayshed_v2.1.hap2.chr18	25179505	25186422	-	TIR-NBS-LRR	manual	1367	LRR_8	PF13855.7	61	0.0023	62.2951	1284	1320
VITMroTrayshed_v2.0.hap2.chr18.ver2.1.g476021.t01	VITMroTrayshed_v2.1.hap2.chr18	25179505	25186422	-	TIR-NBS-LRR	manual	1367	LRR_4	PF12799.8	43	0.00077	95.3488	1287	1329
VITMroTrayshed_v2.0.hap2.chr18.ver2.1.g476030.t01	VITMroTrayshed_v2.1.hap2.chr18	25227701	25237993	-	TIR-NBS-LRR	manual	2385	TIR	PF01582.21	176	1e-45	91.4773	20	187
VITMroTrayshed_v2.0.hap2.chr18.ver2.1.g476030.t01	VITMroTrayshed_v2.1.hap2.chr18	25227701	25237993	-	TIR-NBS-LRR	manual	2385	TIR_2	PF13676.7	121	1.3e-16	80.9917	23	119
VITMroTrayshed_v2.0.hap2.chr18.ver2.1.g476030.t01	VITMroTrayshed_v2.1.hap2.chr18	25227701	25237993	-	TIR-NBS-LRR	manual	2385	NB-ARC	PF00931.23	252	1.3e-26	91.2698	216	441
VITMroTrayshed_v2.0.hap2.chr18.ver2.1.g476030.t01	VITMroTrayshed_v2.1.hap2.chr18	25227701	25237993	-	TIR-NBS-LRR	manual	2385	LRR_3	PF07725.13	20	0.016	95	607	625
VITMroTrayshed_v2.0.hap2.chr18.ver2.1.g476030.t01	VITMroTrayshed_v2.1.hap2.chr18	25227701	25237993	-	TIR-NBS-LRR	manual	2385	LRR_8	PF13855.7	61	0.057	95.082	607	662
VITMroTrayshed_v2.0.hap2.chr18.ver2.1.g476030.t01	VITMroTrayshed_v2.1.hap2.chr18	25227701	25237993	-	TIR-NBS-LRR	manual	2385	LRR_4	PF12799.8	43	0.43	88.3721	652	695
VITMroTrayshed_v2.0.hap2.chr18.ver2.1.g476030.t01	VITMroTrayshed_v2.1.hap2.chr18	25227701	25237993	-	TIR-NBS-LRR	manual	2385	LRR_4	PF12799.8	43	0.002	90.6977	681	721
VITMroTrayshed_v2.0.hap2.chr18.ver2.1.g476030.t01	VITMroTrayshed_v2.1.hap2.chr18	25227701	25237993	-	TIR-NBS-LRR	manual	2385	LRR_8	PF13855.7	61	0.00081	90.1639	681	734
VITMroTrayshed_v2.0.hap2.chr18.ver2.1.g476030.t01	VITMroTrayshed_v2.1.hap2.chr18	25227701	25237993	-	TIR-NBS-LRR	manual	2385	LRR_4	PF12799.8	43	0.012	93.0233	704	746
VITMroTrayshed_v2.0.hap2.chr18.ver2.1.g476030.t01	VITMroTrayshed_v2.1.hap2.chr18	25227701	25237993	-	TIR-NBS-LRR	manual	2385	LRR_8	PF13855.7	61	0.0047	95.082	728	784
VITMroTrayshed_v2.0.hap2.chr18.ver2.1.g476030.t01	VITMroTrayshed_v2.1.hap2.chr18	25227701	25237993	-	TIR-NBS-LRR	manual	2385	LRR_4	PF12799.8	43	0.0088	88.3721	752	791
VITMroTrayshed_v2.0.hap2.chr18.ver2.1.g476030.t01	VITMroTrayshed_v2.1.hap2.chr18	25227701	25237993	-	TIR-NBS-LRR	manual	2385	LRR_8	PF13855.7	61	0.012	90.1639	752	805
VITMroTrayshed_v2.0.hap2.chr18.ver2.1.g476030.t01	VITMroTrayshed_v2.1.hap2.chr18	25227701	25237993	-	TIR-NBS-LRR	manual	2385	LRR_4	PF12799.8	43	0.05	93.0233	775	817
VITMroTrayshed_v2.0.hap2.chr18.ver2.1.g476030.t01	VITMroTrayshed_v2.1.hap2.chr18	25227701	25237993	-	TIR-NBS-LRR	manual	2385	LRR_8	PF13855.7	61	0.0067	93.4426	799	854
VITMroTrayshed_v2.0.hap2.chr18.ver2.1.g476030.t01	VITMroTrayshed_v2.1.hap2.chr18	25227701	25237993	-	TIR-NBS-LRR	manual	2385	LRR_4	PF12799.8	43	0.022	88.3721	823	862
VITMroTrayshed_v2.0.hap2.chr18.ver2.1.g476030.t01	VITMroTrayshed_v2.1.hap2.chr18	25227701	25237993	-	TIR-NBS-LRR	manual	2385	LRR_8	PF13855.7	61	0.0058	95.082	823	879
VITMroTrayshed_v2.0.hap2.chr18.ver2.1.g476030.t01	VITMroTrayshed_v2.1.hap2.chr18	25227701	25237993	-	TIR-NBS-LRR	manual	2385	LRR_4	PF12799.8	43	0.028	88.3721	894	933
VITMroTrayshed_v2.0.hap2.chr18.ver2.1.g476030.t01	VITMroTrayshed_v2.1.hap2.chr18	25227701	25237993	-	TIR-NBS-LRR	manual	2385	LRR_8	PF13855.7	61	0.0058	95.082	894	950
VITMroTrayshed_v2.0.hap2.chr18.ver2.1.g476030.t01	VITMroTrayshed_v2.1.hap2.chr18	25227701	25237993	-	TIR-NBS-LRR	manual	2385	LRR_8	PF13855.7	61	0.021	90.1639	965	1018
VITMroTrayshed_v2.0.hap2.chr18.ver2.1.g476030.t01	VITMroTrayshed_v2.1.hap2.chr18	25227701	25237993	-	TIR-NBS-LRR	manual	2385	LRR_4	PF12799.8	43	0.023	90.6977	1036	1076
VITMroTrayshed_v2.0.hap2.chr18.ver2.1.g476030.t01	VITMroTrayshed_v2.1.hap2.chr18	25227701	25237993	-	TIR-NBS-LRR	manual	2385	LRR_8	PF13855.7	61	0.00022	95.082	1036	1092
VITMroTrayshed_v2.0.hap2.chr18.ver2.1.g476030.t01	VITMroTrayshed_v2.1.hap2.chr18	25227701	25237993	-	TIR-NBS-LRR	manual	2385	LRR_4	PF12799.8	43	0.0075	88.3721	1107	1146
VITMroTrayshed_v2.0.hap2.chr18.ver2.1.g476030.t01	VITMroTrayshed_v2.1.hap2.chr18	25227701	25237993	-	TIR-NBS-LRR	manual	2385	LRR_8	PF13855.7	61	0.01	90.1639	1107	1160
VITMroTrayshed_v2.0.hap2.chr18.ver2.1.g476030.t01	VITMroTrayshed_v2.1.hap2.chr18	25227701	25237993	-	TIR-NBS-LRR	manual	2385	LRR_4	PF12799.8	43	0.051	93.0233	1130	1172
VITMroTrayshed_v2.0.hap2.chr18.ver2.1.g476030.t01	VITMroTrayshed_v2.1.hap2.chr18	25227701	25237993	-	TIR-NBS-LRR	manual	2385	LRR_8	PF13855.7	61	0.0029	96.7213	1154	1211
VITMroTrayshed_v2.0.hap2.chr18.ver2.1.g476030.t01	VITMroTrayshed_v2.1.hap2.chr18	25227701	25237993	-	TIR-NBS-LRR	manual	2385	LRR_4	PF12799.8	43	0.00056	90.6977	1178	1218
VITMroTrayshed_v2.0.hap2.chr18.ver2.1.g476030.t01	VITMroTrayshed_v2.1.hap2.chr18	25227701	25237993	-	TIR-NBS-LRR	manual	2385	LRR_8	PF13855.7	61	0.0024	90.1639	1178	1231
VITMroTrayshed_v2.0.hap2.chr18.ver2.1.g476030.t01	VITMroTrayshed_v2.1.hap2.chr18	25227701	25237993	-	TIR-NBS-LRR	manual	2385	LRR_4	PF12799.8	43	0.0037	93.0233	1201	1243
VITMroTrayshed_v2.0.hap2.chr18.ver2.1.g476030.t01	VITMroTrayshed_v2.1.hap2.chr18	25227701	25237993	-	TIR-NBS-LRR	manual	2385	LRR_8	PF13855.7	61	0.0046	95.082	1225	1281
VITMroTrayshed_v2.0.hap2.chr18.ver2.1.g476030.t01	VITMroTrayshed_v2.1.hap2.chr18	25227701	25237993	-	TIR-NBS-LRR	manual	2385	LRR_4	PF12799.8	43	0.025	90.6977	1249	1289
VITMroTrayshed_v2.0.hap2.chr18.ver2.1.g476030.t01	VITMroTrayshed_v2.1.hap2.chr18	25227701	25237993	-	TIR-NBS-LRR	manual	2385	LRR_8	PF13855.7	61	0.021	88.5246	1249	1301
VITMroTrayshed_v2.0.hap2.chr18.ver2.1.g476030.t01	VITMroTrayshed_v2.1.hap2.chr18	25227701	25237993	-	TIR-NBS-LRR	manual	2385	LRR_8	PF13855.7	61	0.035	95.082	1320	1376
VITMroTrayshed_v2.0.hap2.chr18.ver2.1.g476030.t01	VITMroTrayshed_v2.1.hap2.chr18	25227701	25237993	-	TIR-NBS-LRR	manual	2385	LRR_4	PF12799.8	43	0.0059	88.3721	1391	1430
VITMroTrayshed_v2.0.hap2.chr18.ver2.1.g476030.t01	VITMroTrayshed_v2.1.hap2.chr18	25227701	25237993	-	TIR-NBS-LRR	manual	2385	LRR_8	PF13855.7	61	0.0032	90.1639	1391	1444
VITMroTrayshed_v2.0.hap2.chr18.ver2.1.g476030.t01	VITMroTrayshed_v2.1.hap2.chr18	25227701	25237993	-	TIR-NBS-LRR	manual	2385	LRR_4	PF12799.8	43	0.028	93.0233	1414	1456
VITMroTrayshed_v2.0.hap2.chr18.ver2.1.g476030.t01	VITMroTrayshed_v2.1.hap2.chr18	25227701	25237993	-	TIR-NBS-LRR	manual	2385	LRR_8	PF13855.7	61	0.0066	93.4426	1438	1493
VITMroTrayshed_v2.0.hap2.chr18.ver2.1.g476030.t01	VITMroTrayshed_v2.1.hap2.chr18	25227701	25237993	-	TIR-NBS-LRR	manual	2385	LRR_4	PF12799.8	43	0.024	88.3721	1462	1501
VITMroTrayshed_v2.0.hap2.chr18.ver2.1.g476030.t01	VITMroTrayshed_v2.1.hap2.chr18	25227701	25237993	-	TIR-NBS-LRR	manual	2385	LRR_8	PF13855.7	61	0.0054	95.082	1462	1518
VITMroTrayshed_v2.0.hap2.chr18.ver2.1.g476030.t01	VITMroTrayshed_v2.1.hap2.chr18	25227701	25237993	-	TIR-NBS-LRR	manual	2385	LRR_4	PF12799.8	43	0.22	86.0465	1509	1547
VITMroTrayshed_v2.0.hap2.chr18.ver2.1.g476030.t01	VITMroTrayshed_v2.1.hap2.chr18	25227701	25237993	-	TIR-NBS-LRR	manual	2385	LRR_8	PF13855.7	61	0.00015	95.082	1533	1589
VITMroTrayshed_v2.0.hap2.chr18.ver2.1.g476030.t01	VITMroTrayshed_v2.1.hap2.chr18	25227701	25237993	-	TIR-NBS-LRR	manual	2385	LRR_4	PF12799.8	43	0.35	90.6977	1556	1597
VITMroTrayshed_v2.0.hap2.chr18.ver2.1.g476030.t01	VITMroTrayshed_v2.1.hap2.chr18	25227701	25237993	-	TIR-NBS-LRR	manual	2385	LRR_8	PF13855.7	61	0.43	95.082	1604	1660
VITMroTrayshed_v2.0.hap2.chr18.ver2.1.g476030.t01	VITMroTrayshed_v2.1.hap2.chr18	25227701	25237993	-	TIR-NBS-LRR	manual	2385	LRR_4	PF12799.8	43	0.42	86.0465	1651	1689
VITMroTrayshed_v2.0.hap2.chr18.ver2.1.g476030.t01	VITMroTrayshed_v2.1.hap2.chr18	25227701	25237993	-	TIR-NBS-LRR	manual	2385	LRR_8	PF13855.7	61	0.0036	95.082	1675	1731
VITMroTrayshed_v2.0.hap2.chr18.ver2.1.g476030.t01	VITMroTrayshed_v2.1.hap2.chr18	25227701	25237993	-	TIR-NBS-LRR	manual	2385	LRR_4	PF12799.8	43	0.25	90.6977	1698	1739
VITMroTrayshed_v2.0.hap2.chr18.ver2.1.g476030.t01	VITMroTrayshed_v2.1.hap2.chr18	25227701	25237993	-	TIR-NBS-LRR	manual	2385	LRR_4	PF12799.8	43	0.00067	90.6977	1746	1786
VITMroTrayshed_v2.0.hap2.chr18.ver2.1.g476030.t01	VITMroTrayshed_v2.1.hap2.chr18	25227701	25237993	-	TIR-NBS-LRR	manual	2385	LRR_8	PF13855.7	61	1.2e-05	95.082	1746	1802
VITMroTrayshed_v2.0.hap2.chr18.ver2.1.g476030.t01	VITMroTrayshed_v2.1.hap2.chr18	25227701	25237993	-	TIR-NBS-LRR	manual	2385	LRR_4	PF12799.8	43	0.022	93.0233	1769	1811
VITMroTrayshed_v2.0.hap2.chr18.ver2.1.g476030.t01	VITMroTrayshed_v2.1.hap2.chr18	25227701	25237993	-	TIR-NBS-LRR	manual	2385	LRR_8	PF13855.7	61	0.14	88.5246	1821	1873
VITMroTrayshed_v2.0.hap2.chr18.ver2.1.g476030.t01	VITMroTrayshed_v2.1.hap2.chr18	25227701	25237993	-	TIR-NBS-LRR	manual	2385	LRR_4	PF12799.8	43	0.18	93.0233	1840	1882
VITMroTrayshed_v2.0.hap2.chr18.ver2.1.g476030.t01	VITMroTrayshed_v2.1.hap2.chr18	25227701	25237993	-	TIR-NBS-LRR	manual	2385	LRR_4	PF12799.8	43	0.00096	90.6977	1888	1928
VITMroTrayshed_v2.0.hap2.chr18.ver2.1.g476030.t01	VITMroTrayshed_v2.1.hap2.chr18	25227701	25237993	-	TIR-NBS-LRR	manual	2385	LRR_8	PF13855.7	61	0.00013	93.4426	1888	1943
VITMroTrayshed_v2.0.hap2.chr18.ver2.1.g476030.t01	VITMroTrayshed_v2.1.hap2.chr18	25227701	25237993	-	TIR-NBS-LRR	manual	2385	LRR_8	PF13855.7	61	0.0034	62.2951	2101	2137
VITMroTrayshed_v2.0.hap2.chr18.ver2.1.g476030.t01	VITMroTrayshed_v2.1.hap2.chr18	25227701	25237993	-	TIR-NBS-LRR	manual	2385	LRR_4	PF12799.8	43	0.00041	95.3488	2104	2146
