# Supplementary material for: Haplotype-resolved powdery mildew resistance loci reveal the impact of heterozygous structural variation on NLR genes in Muscadinia rotundifolia
Source: G3 (Bethesda). 2022 Jun 13;12(8):jkac148. doi: 10.1093/g3journal/jkac148 (PMC9339307; doi:10.1093/g3journal/jkac148)
Supplement: jkac148_Supplementary_Table_4 [file jkac148_supplementary_table_4.xlsx]

## Sheet: Sheet1
Supplementary Table 4: Summary of the NLRs composing Run1.2 and Run2.2 loci. This table includes the chromosomal position of Run1.2- and Run2.2-associated SSR markers, as well as the chromosomal position of the NLR genes, the NLR class of the predicted proteins, the effect of the SVs detected between haplotypes, the NLR protein clustering in the phylogenetic tree represented in Figure 3a, and the…
												e6-23 (Run1.2b+)				08391-029 (Run2.2+)
									Clustering in phylogenetic tree represented in Figure 2A			Mock-inoculated leaves		PM-inoculated leaves		Mock-inoculated leaves		PM-inoculated leaves
CDS_ID	chromosome	start	stop	strand	Length	Locus	NLR class	Effect of the SVs detected between haplotypes	Run1/Rpv1 NLRs	Same haplotype	Alternative haplotype	1 dpi	5 dpi	1 dpi	5 dpi	1 dpi	5 dpi	1 dpi	5 dpi
VMC4f3.1	VITMroTrayshed_v2.1.hap1.chr12	11270829	11271019	-	191	Run1.2a
VITMroTrayshed_v2.0.hap1.chr12.ver2.0.g154460.t01	VITMroTrayshed_v2.1.hap1.chr12	11819344	11824191	+	4848	Run1.2a	TIR-NBS-LRR	Whole duplication	RGA11	VITMroTrayshed_v2.0.hap1.chr12.ver2.1.g154990.p01	-	-	-	-	-	-	-	-	-
VITMroTrayshed_v2.0.hap1.chr12.ver2.0.g154500.t01	VITMroTrayshed_v2.1.hap1.chr12	11897381	11904250	+	6870	Run1.2a	TIR-NBS-LRR	Non-functional allele in alternative haplotype	RGA1/RGA9	-	-	-	-	-	-	-	-	-	-
VITMroTrayshed_v2.0.hap1.chr12.ver2.1.g154990.t01	VITMroTrayshed_v2.1.hap1.chr12	12139871	12146172	+	6302	Run1.2a	TIR-NBS-LRR	-	RGA11	VITMroTrayshed_v2.0.hap1.chr12.ver2.0.g154460.p01	-	-	-	-	-	-	-	-	-
VITMroTrayshed_v2.0.hap1.chr12.ver2.1.g155070.t01	VITMroTrayshed_v2.1.hap1.chr12	12244558	12247251	+	2694	Run1.2a	TIR-NBS	-	-	-	VITMroTrayshed_v2.0.hap2.chr12.ver2.1.g402800.p01	-	-	-	-	-	-	-	-
VITMroTrayshed_v2.0.hap1.chr12.ver2.0.g155340.t01	VITMroTrayshed_v2.1.hap1.chr12	12379558	12385915	+	6358	Run1.2a	TIR-NBS-LRR	-	MrRPV1	-	VITMroTrayshed_v2.0.hap2.chr12.ver2.1.g402820.p01	-	-	-	-	-	-	-	-
VITMroTrayshed_v2.0.hap1.chr12.ver2.0.g155440.t01	VITMroTrayshed_v2.1.hap1.chr12	12618713	12625162	+	6450	Run1.2a	TIR-NBS-LRR	-	-	-	VITMroTrayshed_v2.0.hap2.chr12.ver2.0.g402740.p01	-	-	-	-	-	-	-	-
VITMroTrayshed_v2.0.hap1.chr12.ver2.1.g155500.t01	VITMroTrayshed_v2.1.hap1.chr12	12727708	12733670	+	5963	Run1.2a	TIR-NBS-LRR	Non-functional allele in alternative haplotype	MrRUN1	-	-	-	-	-	-	-	-	-	-
VITMroTrayshed_v2.0.hap1.chr12.ver2.1.g155591.t01	VITMroTrayshed_v2.1.hap1.chr12	12898080	12899041	-	962	Run1.2a	CC-NBS	-	-	-	-	-	-	-	-	-	-	-	-
VITMroTrayshed_v2.0.hap1.chr12.ver2.1.g155592.t01	VITMroTrayshed_v2.1.hap1.chr12	12906550	12910345	-	3796	Run1.2a	CC-NBS-LRR	Whole duplication	-	VITMroTrayshed_v2.0.hap1.chr12.ver2.1.g155611.p01	VITMroTrayshed_v2.0.hap2.chr12.ver2.0.g402890.p01	-	-	-	-	-	-	-	-
VITMroTrayshed_v2.0.hap1.chr12.ver2.0.g155600.t01	VITMroTrayshed_v2.1.hap1.chr12	12925709	12929593	-	3885	Run1.2a	CC-NBS-LRR	Non-functional allele in alternative haplotype	-	-	-	-	-	-	-	-	-	-	-
VITMroTrayshed_v2.0.hap1.chr12.ver2.1.g155611.t01	VITMroTrayshed_v2.1.hap1.chr12	12945732	12949595	-	3864	Run1.2a	CC-NBS-LRR	Whole duplication	-	VITMroTrayshed_v2.0.hap1.chr12.ver2.1.g155592.p01	VITMroTrayshed_v2.0.hap2.chr12.ver2.0.g402890.p01	-	-	-	-	-	-	-	-
VITMroTrayshed_v2.0.hap1.chr12.ver2.0.g155760.t01	VITMroTrayshed_v2.1.hap1.chr12	13214534	13221765	+	7232	Run1.2a	TIR-NBS-LRR	-	-	VITMroTrayshed_v2.0.hap1.chr12.ver2.1.g155800.p01	VITMroTrayshed_v2.0.hap2.chr12.ver2.1.g403040.p01	-	-	-	-	-	-	-	-
VITMroTrayshed_v2.0.hap1.chr12.ver2.1.g155800.t01	VITMroTrayshed_v2.1.hap1.chr12	13265548	13271566	+	6019	Run1.2a	TIR-NBS-LRR	-	-	VITMroTrayshed_v2.0.hap1.chr12.ver2.0.g155760.p01	VITMroTrayshed_v2.0.hap2.chr12.ver2.1.g403040.p01	-	-	-	-	-	-	-	-
VITMroTrayshed_v2.0.hap1.chr12.ver2.1.g155871.t01	VITMroTrayshed_v2.1.hap1.chr12	13414917	13416134	+	1218	Run1.2a	RPW8-NBS	Partial duplication	-	VITMroTrayshed_v2.0.hap1.chr12.ver2.0.g155910.p01	VITMroTrayshed_v2.0.hap2.chr12.ver2.0.g403120.p01	-	-	-	-	-	-	-	-
VITMroTrayshed_v2.0.hap1.chr12.ver2.0.g155890.t01	VITMroTrayshed_v2.1.hap1.chr12	13423452	13427276	+	3825	Run1.2a	CC-NBS-LRR	-	-	VITMroTrayshed_v2.0.hap1.chr12.ver2.0.g155920.p01	VITMroTrayshed_v2.0.hap2.chr12.ver2.0.g403130.p01	-	-	-	-	-	-	-	-
VITMroTrayshed_v2.0.hap1.chr12.ver2.0.g155900.t01	VITMroTrayshed_v2.1.hap1.chr12	13438054	13441761	+	3708	Run1.2a	CC-NBS-LRR	Non-functional allele in alternative haplotype	-	-	-	-	-	-	-	-	-	-	-
VITMroTrayshed_v2.0.hap1.chr12.ver2.0.g155910.t01	VITMroTrayshed_v2.1.hap1.chr12	13487050	13490807	+	3758	Run1.2a	CC-NBS-LRR	-	-	VITMroTrayshed_v2.0.hap1.chr12.ver2.1.g155871.p01	VITMroTrayshed_v2.0.hap2.chr12.ver2.0.g403120.p01	-	-	-	-	-	-	-	-
VITMroTrayshed_v2.0.hap1.chr12.ver2.0.g155920.t01	VITMroTrayshed_v2.1.hap1.chr12	13493896	13497720	+	3825	Run1.2a	CC-NBS-LRR	-	-	VITMroTrayshed_v2.0.hap1.chr12.ver2.0.g155890.p01	VITMroTrayshed_v2.0.hap2.chr12.ver2.0.g403130.p01	-	-	-	-	-	-	-	-
VITMroTrayshed_v2.0.hap1.chr12.ver2.0.g155940.t01	VITMroTrayshed_v2.1.hap1.chr12	13527378	13530827	+	3450	Run1.2a	CC-NBS-LRR	-	-	-	VITMroTrayshed_v2.0.hap2.chr12.ver2.0.g403140.p01	-	-	-	-	-	-	-	-
VITMroTrayshed_v2.0.hap1.chr12.ver2.1.g155941.t01	VITMroTrayshed_v2.1.hap1.chr12	13552258	13554627	+	2370	Run1.2a	NBS-LRR	-	-	-	VITMroTrayshed_v2.0.hap2.chr12.ver2.0.g403160.p01	-	-	-	-	-	-	-	-
VITMroTrayshed_v2.0.hap1.chr12.ver2.1.g156131.t01	VITMroTrayshed_v2.1.hap1.chr12	13851287	13852744	+	1458	Run1.2a	RPW8-NBS	-	-	-	VITMroTrayshed_v2.0.hap2.chr12.ver2.0.g403400.p01	-	-	-	-	-	-	-	-
VITMroTrayshed_v2.0.hap1.chr12.ver2.0.g156680.t01	VITMroTrayshed_v2.1.hap1.chr12	14511210	14515480	+	4271	Run1.2a	CC-NBS-LRR	-	-	-	VITMroTrayshed_v2.0.hap2.chr12.ver2.0.g403700.p01	-	-	-	-	-	-	-	-
VITMroTrayshed_v2.0.hap1.chr12.ver2.1.g156691.t01	VITMroTrayshed_v2.1.hap1.chr12	14523838	14527752	+	3915	Run1.2a	NBS-LRR	-	-	-	VITMroTrayshed_v2.0.hap2.chr12.ver2.0.g403720.p01	-	-	-	-	-	-	-	-
VITMroTrayshed_v2.0.hap1.chr12.ver2.1.g156700.t01	VITMroTrayshed_v2.1.hap1.chr12	14538587	14542777	+	4191	Run1.2a	CC-NBS-LRR	-	-	-	VITMroTrayshed_v2.0.hap2.chr12.ver2.0.g403740.p01	-	-	-	-	-	-	-	-
VITMroTrayshed_v2.0.hap1.chr12.ver2.0.g156820.t01	VITMroTrayshed_v2.1.hap1.chr12	14664094	14665896	-	1803	Run1.2a	NBS	-	-	-	VITMroTrayshed_v2.0.hap2.chr12.ver2.0.g403800.p01	-	-	-	-	-	-	-	-
VITMroTrayshed_v2.0.hap1.chr12.ver2.1.g156831.t01	VITMroTrayshed_v2.1.hap1.chr12	14689346	14690641	+	1296	Run1.2a	NBS	-	-	-	VITMroTrayshed_v2.0.hap2.chr12.ver2.0.g403820.p01	-	-	-	-	-	-	-	-
VITMroTrayshed_v2.0.hap1.chr12.ver2.0.g156880.t01	VITMroTrayshed_v2.1.hap1.chr12	14717987	14719216	-	1230	Run1.2a	CC-NBS	Hemizygous / Completely deleted in alternative haplotype	-	-	-	-	-	-	-	-	-	-	-
VITMroTrayshed_v2.0.hap1.chr12.ver2.0.g156890.t01	VITMroTrayshed_v2.1.hap1.chr12	14727381	14731472	-	4092	Run1.2a	NBS-LRR	-	-	-	VITMroTrayshed_v2.0.hap2.chr12.ver2.0.g403840.p01	-	-	-	-	-	-	-	-
VITMroTrayshed_v2.0.hap1.chr12.ver2.0.g156910.t01	VITMroTrayshed_v2.1.hap1.chr12	14751444	14755670	-	4227	Run1.2a	NBS-LRR	-	-	-	VITMroTrayshed_v2.0.hap2.chr12.ver2.0.g403860.p01	-	-	-	-	-	-	-	-
VITMroTrayshed_v2.0.hap2.chr12.ver2.1.g404040.t01	VITMroTrayshed_v2.1.hap1.chr12	14942146	14946402	+	4257	Run1.2a	CC-NBS-LRR	Partial duplication	-	VITMroTrayshed_v2.0.hap2.chr12.ver2.0.g404100.p01	-	-	-	-	-	-	-	-	-
VITMroTrayshed_v2.0.hap2.chr12.ver2.1.g404080.t01	VITMroTrayshed_v2.1.hap1.chr12	14983562	14987836	+	4275	Run1.2a	CC-NBS-LRR	Partial duplication	-	VITMroTrayshed_v2.0.hap2.chr12.ver2.0.g404150.p01	-	-	-	-	-	-	-	-	-
VITMroTrayshed_v2.0.hap2.chr12.ver2.0.g404100.t01	VITMroTrayshed_v2.1.hap1.chr12	15024259	15028544	+	4286	Run1.2a	NBS-LRR	-	-	VITMroTrayshed_v2.0.hap2.chr12.ver2.1.g404040.p01	-	-	-	-	-	-	-	-	-
VITMroTrayshed_v2.0.hap2.chr12.ver2.1.g404131.t01	VITMroTrayshed_v2.1.hap1.chr12	15091453	15095601	+	4149	Run1.2a	CC-NBS-LRR	-	-	-	VITMroTrayshed_v2.0.hap1.chr12.ver2.1.g157040.p01	-	-	-	-	-	-	-	-
VITMroTrayshed_v2.0.hap2.chr12.ver2.0.g404150.t01	VITMroTrayshed_v2.1.hap1.chr12	15113024	15114316	+	1293	Run1.2a	NBS		-	VITMroTrayshed_v2.0.hap2.chr12.ver2.1.g404080.p01	-	-	-	-	-	-	-	-	-
VITMroTrayshed_v2.0.hap1.chr12.ver2.0.g157300.t01	VITMroTrayshed_v2.1.hap1.chr12	15368330	15372571	-	4242	Run1.2a	NBS-LRR	Whole duplication	-	VITMroTrayshed_v2.0.hap1.chr12.ver2.0.g157310.p01	VITMroTrayshed_v2.0.hap2.chr12.ver2.0.g404350.p01	-	-	-	-	-	-	-	-
VITMroTrayshed_v2.0.hap1.chr12.ver2.0.g157310.t01	VITMroTrayshed_v2.1.hap1.chr12	15397978	15407209	-	9232	Run1.2a	NBS-LRR	-	-	VITMroTrayshed_v2.0.hap1.chr12.ver2.0.g157300.p01	VITMroTrayshed_v2.0.hap2.chr12.ver2.0.g404350.p01	-	-	-	-	-	-	-	-
VITMroTrayshed_v2.0.hap1.chr12.ver2.0.g157320.t01	VITMroTrayshed_v2.1.hap1.chr12	15428801	15433972	-	5172	Run1.2a	NBS-LRR	-	-	-	VITMroTrayshed_v2.0.hap2.chr12.ver2.0.g404330.p01 VITMroTrayshed_v2.0.hap2.chr12.ver2.0.g404340.p01	-	-	-	-	-	-	-	-
VMC8g9	VITMroTrayshed_v2.1.hap1.chr12	15610752	15610887	-	136	Run1.2a
VMC4f3.1	VITMroTrayshed_v2.1.hap2.chr12	11341821	11342001	-	181	Run1.2b
VITMroTrayshed_v2.0.hap2.chr12.ver2.1.g402690.t01	VITMroTrayshed_v2.1.hap2.chr12	11952950	11959026	+	6077	Run1.2b	TIR-NBS-LRR	-	-	VITMroTrayshed_v2.0.hap2.chr12.ver2.1.g402762.p01	-	4.17621	2.70377	3.89901	2.49132	-	-	-	-
VITMroTrayshed_v2.0.hap2.chr12.ver2.0.g402740.t01	VITMroTrayshed_v2.1.hap2.chr12	12066888	12069854	+	2967	Run1.2b	TIR-NBS	Loss of LRR domain	-	-	VITMroTrayshed_v2.0.hap1.chr12.ver2.0.g155440.p01	5.95169	4.30919	5.87631	4.67595	-	-	-	-
VITMroTrayshed_v2.0.hap2.chr12.ver2.1.g402762.t01	VITMroTrayshed_v2.1.hap2.chr12	12144629	12149713	+	5085	Run1.2b	TIR-NBS-LRR	Whole duplication	-	VITMroTrayshed_v2.0.hap2.chr12.ver2.1.g402690.p01	-	0.215121	0.177469	0.349309	0.088295	-	-	-	-
VITMroTrayshed_v2.0.hap2.chr12.ver2.1.g402800.t01	VITMroTrayshed_v2.1.hap2.chr12	12208023	12211025	+	3003	Run1.2b	TIR-NBS	-	-	-	VITMroTrayshed_v2.0.hap1.chr12.ver2.1.g155070.p01	2.18226	1.23474	1.42814	1.03867	-	-	-	-
VITMroTrayshed_v2.0.hap2.chr12.ver2.1.g402820.t01	VITMroTrayshed_v2.1.hap2.chr12	12256240	12262340	+	6101	Run1.2b	TIR-NBS-LRR	-	MrRPV1	-	VITMroTrayshed_v2.0.hap1.chr12.ver2.0.g155340.p01	7.63237	8.14578	8.20663	6.63839	-	-	-	-
VITMroTrayshed_v2.0.hap2.chr12.ver2.0.g402890.t01	VITMroTrayshed_v2.1.hap2.chr12	12426243	12427376	-	1134	Run1.2b	CC-NBS	-	-	-	VITMroTrayshed_v2.0.hap1.chr12.ver2.1.g155592.p01 VITMroTrayshed_v2.0.hap1.chr12.ver2.1.g155611.p01	0.319401	0.32174	0.160665	0.509813	-	-	-	-
VITMroTrayshed_v2.0.hap2.chr12.ver2.1.g403040.t01	VITMroTrayshed_v2.1.hap2.chr12	12671790	12677764	+	5975	Run1.2b	TIR-NBS-LRR	-	-	-	VITMroTrayshed_v2.0.hap1.chr12.ver2.0.g155760.p01	1.26023	1.11872	1.70078	1.01286	-	-	-	-
VITMroTrayshed_v2.0.hap2.chr12.ver2.0.g403120.t01	VITMroTrayshed_v2.1.hap2.chr12	12812804	12816619	+	3816	Run1.2b	RPW8-NBS-LRR	-	-	-	VITMroTrayshed_v2.0.hap1.chr12.ver2.1.g155871.p01	0.0438129	0.0596942	0.0886985	0	-	-	-	-
VITMroTrayshed_v2.0.hap2.chr12.ver2.0.g403130.t01	VITMroTrayshed_v2.1.hap2.chr12	12821110	12824934	+	3825	Run1.2b	CC-NBS-LRR	-	-	-	VITMroTrayshed_v2.0.hap1.chr12.ver2.0.g155910.p01 VITMroTrayshed_v2.0.hap1.chr12.ver2.0.g155920.p01	0.168303	0.128539	0.171299	0.173799	-	-	-	-
VITMroTrayshed_v2.0.hap2.chr12.ver2.0.g403140.t01	VITMroTrayshed_v2.1.hap2.chr12	12854619	12858248	+	3630	Run1.2b	CC-NBS-LRR	-	-	-	VITMroTrayshed_v2.0.hap1.chr12.ver2.0.g155940.p01	0.578464	0.420388	0.5122	0.27818	-	-	-	-
VITMroTrayshed_v2.0.hap2.chr12.ver2.0.g403160.t01	VITMroTrayshed_v2.1.hap2.chr12	12880979	12884602	+	3624	Run1.2b	NBS-LRR	-	-	-	VITMroTrayshed_v2.0.hap1.chr12.ver2.1.g155941.p01	0.138799	0.483445	0.51493	0.454694	-	-	-	-
VITMroTrayshed_v2.0.hap2.chr12.ver2.0.g403400.t01	VITMroTrayshed_v2.1.hap2.chr12	13173692	13177669	+	3978	Run1.2b	RPW8-NBS-LRR	-	-	-	VITMroTrayshed_v2.0.hap1.chr12.ver2.1.g156131.p01	0.211445	0.146958	0.168809	0.134188	-	-	-	-
VITMroTrayshed_v2.0.hap2.chr12.ver2.0.g403700.t01	VITMroTrayshed_v2.1.hap2.chr12	13742698	13746968	+	4271	Run1.2b	NBS-LRR	-	-	-	VITMroTrayshed_v2.0.hap1.chr12.ver2.0.g156680.p01	0.27594	0.45681	0.274721	0.268733	-	-	-	-
VITMroTrayshed_v2.0.hap2.chr12.ver2.0.g403720.t01	VITMroTrayshed_v2.1.hap2.chr12	13757220	13758659	+	1440	Run1.2b	NBS	Loss of LRR domain compared to alternative haplotype	-	-	VITMroTrayshed_v2.0.hap1.chr12.ver2.1.g156691.p01	0.0100633	0.0553285	0.122197	0	-	-	-	-
VITMroTrayshed_v2.0.hap2.chr12.ver2.0.g403740.t01	VITMroTrayshed_v2.1.hap2.chr12	13779417	13783487	+	4071	Run1.2b	NBS-LRR	-	-	-	VITMroTrayshed_v2.0.hap1.chr12.ver2.1.g156700.p01	1.46203	0.916175	1.71061	0.937213	-	-	-	-
VITMroTrayshed_v2.0.hap2.chr12.ver2.0.g403800.t01	VITMroTrayshed_v2.1.hap2.chr12	13905676	13907279	-	1604	Run1.2b	NBS	-	-	-	VITMroTrayshed_v2.0.hap1.chr12.ver2.0.g156820.p01	0.0588133	0.0301807	0.0304814	0.0149086	-	-	-	-
VITMroTrayshed_v2.0.hap2.chr12.ver2.0.g403820.t01	VITMroTrayshed_v2.1.hap2.chr12	13930737	13934702	+	3966	Run1.2b	NBS-LRR	-	-	-	VITMroTrayshed_v2.0.hap1.chr12.ver2.1.g156831.p01	0.00757033	0.00438899	0.0107755	0.00968088	-	-	-	-
VITMroTrayshed_v2.0.hap2.chr12.ver2.0.g403840.t01	VITMroTrayshed_v2.1.hap2.chr12	13953152	13957243	-	4092	Run1.2b	NBS-LRR	-	-	-	VITMroTrayshed_v2.0.hap1.chr12.ver2.0.g156890.p01	0.205926	0.268449	0.312712	0.162261	-	-	-	-
VITMroTrayshed_v2.0.hap2.chr12.ver2.0.g403860.t01	VITMroTrayshed_v2.1.hap2.chr12	13977050	13981201	-	4152	Run1.2b	NBS-LRR	-	-	-	VITMroTrayshed_v2.0.hap1.chr12.ver2.0.g156910.p01	1.97727	1.56537	1.74876	1.52426	-	-	-	-
VITMroTrayshed_v2.0.hap1.chr12.ver2.1.g157040.t01	VITMroTrayshed_v2.1.hap2.chr12	14256841	14261061	+	4221	Run1.2b	CC-NBS-LRR	-	-	-	VITMroTrayshed_v2.0.hap2.chr12.ver2.1.g404131.p01	3.78173	3.44316	3.59682	3.03158	-	-	-	-
VITMroTrayshed_v2.0.hap1.chr12.ver2.0.g157180.t01	VITMroTrayshed_v2.1.hap2.chr12	14400953	14402169	+	1217	Run1.2b	CC-NBS	-	-	-	-	0	0	0	0	-	-	-	-
VITMroTrayshed_v2.0.hap2.chr12.ver2.0.g404330.t01	VITMroTrayshed_v2.1.hap2.chr12	14521024	14525334	-	4311	Run1.2b	NBS-LRR	Whole duplication	-	VITMroTrayshed_v2.0.hap2.chr12.ver2.0.g404340.p01	VITMroTrayshed_v2.0.hap1.chr12.ver2.0.g157320.p01	0	0.0450681	0.0496067	0.158507	-	-	-	-
VITMroTrayshed_v2.0.hap2.chr12.ver2.0.g404340.t01	VITMroTrayshed_v2.1.hap2.chr12	14540960	14546087	-	5128	Run1.2b	NBS-LRR	-	-	VITMroTrayshed_v2.0.hap2.chr12.ver2.0.g404330.p01	VITMroTrayshed_v2.0.hap1.chr12.ver2.0.g157320.p01	0.205594	0.167983	0.159927	0.247091	-	-	-	-
VITMroTrayshed_v2.0.hap2.chr12.ver2.0.g404350.t01	VITMroTrayshed_v2.1.hap2.chr12	14569133	14573371	-	4239	Run1.2b	NBS-LRR	-	-	-	VITMroTrayshed_v2.0.hap1.chr12.ver2.0.g157300.p01 VITMroTrayshed_v2.0.hap1.chr12.ver2.0.g157310.p01	2.29755	2.46152	2.04192	1.83777	-	-	-	-
VMC8g9	VITMroTrayshed_v2.1.hap2.chr12	14721275	14721411	-	137	Run1.2b
VMC7f2	VITMroTrayshed_v2.1.hap1.chr18	29898629	29898824	-	196	Run2.2
VITMroTrayshed_v2.0.hap2.chr18.ver2.1.g474920.t01	VITMroTrayshed_v2.1.hap1.chr18	30213249	30214956	+	1708	Run2.2	TIR-NBS	-	-	-	VITMroTrayshed_v2.0.hap1.chr18.ver2.0.g234460.p01	-	-	-	-	2.10702	1.1945	2.48692	1.82667
VITMroTrayshed_v2.0.hap2.chr18.ver2.0.g474980.t01	VITMroTrayshed_v2.1.hap1.chr18	30293430	30296521	-	3092	Run2.2	TIR-NBS	-	-	-	VITMroTrayshed_v2.0.hap1.chr18.ver2.0.g234510.p01	-	-	-	-	0.220552	0.0344125	0.105833	0.0158581
VITMroTrayshed_v2.0.hap2.chr18.ver2.0.g474990.t01	VITMroTrayshed_v2.1.hap1.chr18	30298017	30307610	-	9594	Run2.2	TIR-NBS	-	-	-	VITMroTrayshed_v2.0.hap1.chr18.ver2.0.g234520.p01	-	-	-	-	0.0139569	0	0.0243552	0.0225081
VITMroTrayshed_v2.0.hap1.chr18.ver2.1.g234570.t01	VITMroTrayshed_v2.1.hap1.chr18	30437087	30441432	+	4346	Run2.2	TIR-NBS-LRR	-	-	-	VITMroTrayshed_v2.0.hap2.chr18.ver2.1.g475030.p01	-	-	-	-	0	0	0	0
VITMroTrayshed_v2.0.hap1.chr18.ver2.0.g234590.t01	VITMroTrayshed_v2.1.hap1.chr18	30467416	30471951	+	4536	Run2.2	TIR-NBS-LRR	-	-	-	VITMroTrayshed_v2.0.hap2.chr18.ver2.0.g475070.p01	-	-	-	-	1.34239	0.469936	1.41323	0.632235
VITMroTrayshed_v2.0.hap1.chr18.ver2.1.g234592.t01	VITMroTrayshed_v2.1.hap1.chr18	30492424	30493452	+	1029	Run2.2	NBS	-	-	-	VITMroTrayshed_v2.0.hap2.chr18.ver2.1.g475071.p01	-	-	-	-	0.0480737	0	0.0383477	0.0839339
VITMroTrayshed_v2.0.hap1.chr18.ver2.1.g234593.t01	VITMroTrayshed_v2.1.hap1.chr18	30510778	30517335	-	6558	Run2.2	TIR-NBS-LRR	Hemizygous / Completely deleted in alternative haplotype	-	-	-	-	-	-	-	0	0	0	0
VITMroTrayshed_v2.0.hap1.chr18.ver2.1.g234594.t01	VITMroTrayshed_v2.1.hap1.chr18	30522471	30529039	+	6569	Run2.2	TIR-NBS-LRR	Partial duplication	-	VITMroTrayshed_v2.0.hap1.chr18.ver2.1.g234600.p01	VITMroTrayshed_v2.0.hap2.chr18.ver2.0.g475080.p01	-	-	-	-	0.0399106	0.0152384	0.0540305	0.0398479
VITMroTrayshed_v2.0.hap1.chr18.ver2.1.g234600.t01	VITMroTrayshed_v2.1.hap1.chr18	30550522	30553481	+	2960	Run2.2	TIR-NBS	-	-	VITMroTrayshed_v2.0.hap1.chr18.ver2.1.g234594.p01	VITMroTrayshed_v2.0.hap2.chr18.ver2.0.g475080.p01	-	-	-	-	0.285015	0.162101	0.110401	0.220444
VITMroTrayshed_v2.0.hap1.chr18.ver2.1.g234603.t01	VITMroTrayshed_v2.1.hap1.chr18	30569188	30571238	+	2051	Run2.2	TIR-NBS	-	-	-	VITMroTrayshed_v2.0.hap2.chr18.ver2.1.g475082.p01	-	-	-	-	0.0316836	0	0	0.0101934
VITMroTrayshed_v2.0.hap1.chr18.ver2.1.g234671.t01	VITMroTrayshed_v2.1.hap1.chr18	30649335	30653223	-	3889	Run2.2	TIR-NBS-LRR	-	-	-	VITMroTrayshed_v2.0.hap2.chr18.ver2.1.g475191.p01	-	-	-	-	1.85004	0.677684	1.88072	1.22418
VITMroTrayshed_v2.0.hap1.chr18.ver2.1.g234691.t01	VITMroTrayshed_v2.1.hap1.chr18	30677624	30682356	+	4733	Run2.2	TIR-NBS-LRR	-	-	-	VITMroTrayshed_v2.0.hap2.chr18.ver2.1.g475201.p01	-	-	-	-	1.02286	0.728419	1.68071	0.722371
VITMroTrayshed_v2.0.hap1.chr18.ver2.1.g234701.t01	VITMroTrayshed_v2.1.hap1.chr18	30750163	30751872	-	1710	Run2.2	TIR-NBS	Hemizygous / Completely deleted in alternative haplotype	-	-	-	-	-	-	-	0	0	0.0122014	0
VITMroTrayshed_v2.0.hap1.chr18.ver2.1.g234731.t01	VITMroTrayshed_v2.1.hap1.chr18	30795921	30797134	-	1214	Run2.2	TIR-NBS	Loss of LRR domain compared to alternative haplotype	-	-	VITMroTrayshed_v2.0.hap2.chr18.ver2.1.g475211.p01	-	-	-	-	1.27715	0.470003	1.65488	0.486685
VITMroTrayshed_v2.0.hap1.chr18.ver2.1.g234740.t01	VITMroTrayshed_v2.1.hap1.chr18	30806299	30810147	-	3849	Run2.2	TIR-NBS-LRR	-	-	-	VITMroTrayshed_v2.0.hap2.chr18.ver2.1.g475212.p01	-	-	-	-	0.382179	0.409661	0.420724	0.528093
VITMroTrayshed_v2.0.hap1.chr18.ver2.1.g234760.t01	VITMroTrayshed_v2.1.hap1.chr18	30852770	30857046	+	4277	Run2.2	TIR-NBS-LRR	-	-	-	VITMroTrayshed_v2.0.hap2.chr18.ver2.1.g475214.p01	-	-	-	-	5.46888	3.15524	5.84246	3.50804
VITMroTrayshed_v2.0.hap1.chr18.ver2.1.g234770.t01	VITMroTrayshed_v2.1.hap1.chr18	30865944	30869933	+	3990	Run2.2	TIR-NBS-LRR	Hemizygous / Completely deleted in alternative haplotype	-	-	VITMroTrayshed_v2.0.hap2.chr18.ver2.1.g475213.p01	-	-	-	-	0	0	0	0
VITMroTrayshed_v2.0.hap1.chr18.ver2.1.g234791.t01	VITMroTrayshed_v2.1.hap1.chr18	30887483	30888493	-	1011	Run2.2	NBS	Hemizygous / Completely deleted in alternative haplotype	-	-	-	-	-	-	-	0.384345	0.0623486	0.45544	0.118654
VITMroTrayshed_v2.0.hap1.chr18.ver2.1.g234810.t01	VITMroTrayshed_v2.1.hap1.chr18	30926440	30931927	+	5488	Run2.2	NBS-LRR	-	-	-	VITMroTrayshed_v2.0.hap2.chr18.ver2.1.g475361.p01	-	-	-	-	0.62654	0.443739	0.750809	0.379392
VITMroTrayshed_v2.0.hap1.chr18.ver2.0.g235160.t01	VITMroTrayshed_v2.1.hap1.chr18	31647288	31678612	-	31325	Run2.2	TIR-NBS-LRR	-	-	VITMroTrayshed_v2.0.hap1.chr18.ver2.1.g235201.p01	-	-	-	-	-	0.431971	0.246182	0.417313	0.377034
VITMroTrayshed_v2.0.hap1.chr18.ver2.0.g235180.t01	VITMroTrayshed_v2.1.hap1.chr18	31685640	31689654	+	4015	Run2.2	TIR-NBS-LRR	-	-	VITMroTrayshed_v2.0.hap1.chr18.ver2.1.g235202.p01	VITMroTrayshed_v2.0.hap2.chr18.ver2.1.g475631.p01	-	-	-	-	1.68039	0.729758	1.37892	0.741702
VITMroTrayshed_v2.0.hap1.chr18.ver2.1.g235201.t01	VITMroTrayshed_v2.1.hap1.chr18	31742987	31744684	-	1698	Run2.2	NBS-LRR	-	-	VITMroTrayshed_v2.0.hap1.chr18.ver2.0.g235160.p01	-	-	-	-	-	0.0103431	0	0	0
VITMroTrayshed_v2.0.hap1.chr18.ver2.1.g235202.t01	VITMroTrayshed_v2.1.hap1.chr18	31749731	31750621	+	891	Run2.2	NBS	Loss of TIR and LRR domains compared to alternative haplotype	-	VITMroTrayshed_v2.0.hap1.chr18.ver2.0.g235180.p01	VITMroTrayshed_v2.0.hap2.chr18.ver2.1.g475631.p01	-	-	-	-	0	0	0	0
VITMroTrayshed_v2.0.hap1.chr18.ver2.1.g235270.t01	VITMroTrayshed_v2.1.hap1.chr18	31857531	31860415	+	2885	Run2.2	TIR-NBS-LRR	-	-	-	VITMroTrayshed_v2.0.hap2.chr18.ver2.1.g475691.p01 VITMroTrayshed_v2.0.hap2.chr18.ver2.1.g475682.p01	-	-	-	-	2.25255	0.960084	2.46695	1.46846
VITMroTrayshed_v2.0.hap1.chr18.ver2.1.g235400.t01	VITMroTrayshed_v2.1.hap1.chr18	31967343	31983539	-	16197	Run2.2	NBS-LRR	-	-	VITMroTrayshed_v2.0.hap1.chr18.ver2.1.g235401.p01	VITMroTrayshed_v2.0.hap2.chr18.ver2.1.g475810.p01	-	-	-	-	0.220373	0.0727616	0.112341	0.0545325
VITMroTrayshed_v2.0.hap1.chr18.ver2.1.g235401.t01	VITMroTrayshed_v2.1.hap1.chr18	31987910	32007547	-	19638	Run2.2	TIR-NBS-LRR	-	-	VITMroTrayshed_v2.0.hap1.chr18.ver2.1.g235400.p01	VITMroTrayshed_v2.0.hap2.chr18.ver2.1.g475810.p01	-	-	-	-	0.427742	0.0599216	0.29554	0.199841
VITMroTrayshed_v2.0.hap1.chr18.ver2.1.g235511.t01	VITMroTrayshed_v2.1.hap1.chr18	32077317	32078789	+	1473	Run2.2	NBS	-	-	-	VITMroTrayshed_v2.0.hap2.chr18.ver2.1.g475881.p01	-	-	-	-	0.186917	0.0639414	0.162939	0.18142
VITMroTrayshed_v2.0.hap1.chr18.ver2.0.g235550.t01	VITMroTrayshed_v2.1.hap1.chr18	32089261	32096495	+	7235	Run2.2	TIR-NBS-LRR	Partial duplication	-	VITMroTrayshed_v2.0.hap1.chr18.ver2.1.g235581.p01	VITMroTrayshed_v2.0.hap2.chr18.ver2.1.g475882.p01	-	-	-	-	0.0322601	0.00673852	0.0321546	0
VITMroTrayshed_v2.0.hap1.chr18.ver2.1.g235570.t01	VITMroTrayshed_v2.1.hap1.chr18	32115571	32124070	+	8500	Run2.2	TIR-NBS-LRR	Partial duplication	-	VITMroTrayshed_v2.0.hap1.chr18.ver2.1.g235630.p01	-	-	-	-	-	2.09422	0.576628	1.71973	0.868177
VITMroTrayshed_v2.0.hap1.chr18.ver2.1.g235581.t01	VITMroTrayshed_v2.1.hap1.chr18	32264865	32269832	+	4968	Run2.2	TIR-NBS	-	-	VITMroTrayshed_v2.0.hap1.chr18.ver2.0.g235550.p01	VITMroTrayshed_v2.0.hap2.chr18.ver2.1.g475882.p01	-	-	-	-	0.0270238	0	0.145031	0
VITMroTrayshed_v2.0.hap1.chr18.ver2.1.g235630.t01	VITMroTrayshed_v2.1.hap1.chr18	32292605	32299782	+	7178	Run2.2	TIR-NBS-LRR	-	-	VITMroTrayshed_v2.0.hap1.chr18.ver2.1.g235570.p01	-	-	-	-	-	1.78169	0.646091	1.70356	1.40566
VITMroTrayshed_v2.0.hap1.chr18.ver2.1.g235640.t01	VITMroTrayshed_v2.1.hap1.chr18	32306716	32313526	+	6811	Run2.2	NBS-LRR	-	-	VITMroTrayshed_v2.0.hap1.chr18.ver2.1.g235650.p01	-	-	-	-	-	1.03723	0.327328	1.00795	0.531027
VITMroTrayshed_v2.0.hap1.chr18.ver2.1.g235650.t01	VITMroTrayshed_v2.1.hap1.chr18	32318914	32326122	+	7209	Run2.2	TIR-NBS-LRR	-	-	VITMroTrayshed_v2.0.hap1.chr18.ver2.1.g235640.p01	-	-	-	-	-	0.288881	0.113268	0.183455	0.151496
VITMroTrayshed_v2.0.hap1.chr18.ver2.1.g235721.t01	VITMroTrayshed_v2.1.hap1.chr18	32491970	32497507	-	5538	Run2.2	TIR-NBS-LRR	-	-	VITMroTrayshed_v2.0.hap1.chr18.ver2.1.g235731.p01	VITMroTrayshed_v2.0.hap2.chr18.ver2.1.g475971.p01	-	-	-	-	0.00930353	0	0.0540055	0.0260445
VITMroTrayshed_v2.0.hap1.chr18.ver2.1.g235731.t01	VITMroTrayshed_v2.1.hap1.chr18	32514002	32517369	-	3368	Run2.2	TIR-NBS	-	-	VITMroTrayshed_v2.0.hap1.chr18.ver2.1.g235721.p01	VITMroTrayshed_v2.0.hap2.chr18.ver2.1.g475971.p01	-	-	-	-	0.942491	0.262128	0.900636	0.534571
VITMroTrayshed_v2.0.hap1.chr18.ver2.1.g235741.t01	VITMroTrayshed_v2.1.hap1.chr18	32570597	32575313	-	4717	Run2.2	TIR-NBS-LRR	-	-	-	VITMroTrayshed_v2.0.hap2.chr18.ver2.1.g476021.p01 VITMroTrayshed_v2.0.hap2.chr18.ver2.1.g476030.p01	-	-	-	-	0.0418181	0	0.0732284	0.0103379
VITMroTrayshed_v2.0.hap1.chr18.ver2.1.g235761.t01	VITMroTrayshed_v2.1.hap1.chr18	32628573	32629832	-	1260	Run2.2	NBS	-	-	VITMroTrayshed_v2.0.hap1.chr18.ver2.1.g235762.p01 VITMroTrayshed_v2.0.hap1.chr18.ver2.1.g235763.p01	-	-	-	-	-	0	0	0.115621	0
VITMroTrayshed_v2.0.hap1.chr18.ver2.1.g235762.t01	VITMroTrayshed_v2.1.hap1.chr18	32643264	32647809	-	4546	Run2.2	TIR-NBS-LRR	Partial duplication	-	VITMroTrayshed_v2.0.hap1.chr18.ver2.1.g235761.p01 VITMroTrayshed_v2.0.hap1.chr18.ver2.1.g235763.p01	-	-	-	-	-	0.260652	0.0926503	0.206937	0.0859874
VITMroTrayshed_v2.0.hap1.chr18.ver2.1.g235763.t01	VITMroTrayshed_v2.1.hap1.chr18	32663377	32664258	-	882	Run2.2	NBS	-	-	VITMroTrayshed_v2.0.hap1.chr18.ver2.1.g235761.p01 VITMroTrayshed_v2.0.hap1.chr18.ver2.1.g235762.p01	-	-	-	-	-	0.1046	0	0.121609	0.030815
UDV108	VITMroTrayshed_v2.1.hap1.chr18	33344318	33344542	+	225	Run2.2
VMC7f2	VITMroTrayshed_v2.1.hap2.chr18	22797885	22798080	-	196	-
VITMroTrayshed_v2.0.hap1.chr18.ver2.0.g234460.t01	VITMroTrayshed_v2.1.hap2.chr18	23101949	23105286	+	3338	-	TIR-NBS-LRR	-	-	-	VITMroTrayshed_v2.0.hap2.chr18.ver2.1.g474920.p01	-	-	-	-	-	-	-	-
VITMroTrayshed_v2.0.hap1.chr18.ver2.0.g234510.t01	VITMroTrayshed_v2.1.hap2.chr18	23182127	23185188	-	3062	-	TIR-NBS	-	-	-	VITMroTrayshed_v2.0.hap2.chr18.ver2.0.g474980.p01	-	-	-	-	-	-	-	-
VITMroTrayshed_v2.0.hap1.chr18.ver2.0.g234520.t01	VITMroTrayshed_v2.1.hap2.chr18	23187348	23196302	-	8955	-	TIR-NBS	-	-	-	VITMroTrayshed_v2.0.hap2.chr18.ver2.0.g474990.p01	-	-	-	-	-	-	-	-
VITMroTrayshed_v2.0.hap2.chr18.ver2.1.g475030.t01	VITMroTrayshed_v2.1.hap2.chr18	23339898	23344583	+	4686	-	TIR-NBS-LRR	-	-	-	VITMroTrayshed_v2.0.hap1.chr18.ver2.1.g234570.p01	-	-	-	-	-	-	-	-
VITMroTrayshed_v2.0.hap2.chr18.ver2.0.g475070.t01	VITMroTrayshed_v2.1.hap2.chr18	23388978	23393513	+	4536	-	TIR-NBS-LRR	-	-	-	VITMroTrayshed_v2.0.hap1.chr18.ver2.0.g234590.p01	-	-	-	-	-	-	-	-
VITMroTrayshed_v2.0.hap2.chr18.ver2.1.g475071.t01	VITMroTrayshed_v2.1.hap2.chr18	23417577	23420585	+	3009	-	TIR-NBS-LRR	-	-	-	VITMroTrayshed_v2.0.hap1.chr18.ver2.1.g234592.p01	-	-	-	-	-	-	-	-
VITMroTrayshed_v2.0.hap2.chr18.ver2.0.g475080.t01	VITMroTrayshed_v2.1.hap2.chr18	23449532	23454980	+	5449	-	TIR-NBS-LRR	-	-	-	VITMroTrayshed_v2.0.hap1.chr18.ver2.1.g234594.p01 VITMroTrayshed_v2.0.hap1.chr18.ver2.1.g234600.p01	-	-	-	-	-	-	-	-
VITMroTrayshed_v2.0.hap2.chr18.ver2.1.g475082.t01	VITMroTrayshed_v2.1.hap2.chr18	23468177	23471289	+	3113	-	TIR-NBS-LRR	-	-	-	VITMroTrayshed_v2.0.hap1.chr18.ver2.1.g234603.p01	-	-	-	-	-	-	-	-
VITMroTrayshed_v2.0.hap2.chr18.ver2.1.g475191.t01	VITMroTrayshed_v2.1.hap2.chr18	23585363	23589250	-	3888	-	TIR-NBS-LRR	-	-	-	VITMroTrayshed_v2.0.hap1.chr18.ver2.1.g234671.p01	-	-	-	-	-	-	-	-
VITMroTrayshed_v2.0.hap2.chr18.ver2.1.g475201.t01	VITMroTrayshed_v2.1.hap2.chr18	23616123	23620847	+	4725	-	TIR-NBS-LRR	-	-	-	VITMroTrayshed_v2.0.hap1.chr18.ver2.1.g234691.p01	-	-	-	-	-	-	-	-
VITMroTrayshed_v2.0.hap2.chr18.ver2.1.g475211.t01	VITMroTrayshed_v2.1.hap2.chr18	23624297	23627522	-	3226	-	NBS-LRR	-	-	-	VITMroTrayshed_v2.0.hap1.chr18.ver2.1.g234731.p01	-	-	-	-	-	-	-	-
VITMroTrayshed_v2.0.hap2.chr18.ver2.1.g475212.t01	VITMroTrayshed_v2.1.hap2.chr18	23633302	23635058	-	1757	-	TIR-NBS	-	-	-	VITMroTrayshed_v2.0.hap1.chr18.ver2.1.g234740.p01	-	-	-	-	-	-	-	-
VITMroTrayshed_v2.0.hap2.chr18.ver2.1.g475213.t01	VITMroTrayshed_v2.1.hap2.chr18	23656540	23660609	+	4070	-	TIR-NBS-LRR	-	-	-	VITMroTrayshed_v2.0.hap1.chr18.ver2.1.g234770.p01	-	-	-	-	-	-	-	-
VITMroTrayshed_v2.0.hap2.chr18.ver2.1.g475214.t01	VITMroTrayshed_v2.1.hap2.chr18	23677773	23681909	+	4137	-	TIR-NBS-LRR	-	-	-	VITMroTrayshed_v2.0.hap1.chr18.ver2.1.g234760.p01	-	-	-	-	-	-	-	-
VITMroTrayshed_v2.0.hap2.chr18.ver2.1.g475361.t01	VITMroTrayshed_v2.1.hap2.chr18	23723579	23729865	+	6287	-	TIR-NBS-LRR	-	-	-	VITMroTrayshed_v2.0.hap1.chr18.ver2.1.g234810.p01	-	-	-	-	-	-	-	-
VITMroTrayshed_v2.0.hap2.chr18.ver2.1.g475631.t01	VITMroTrayshed_v2.1.hap2.chr18	24432010	24435022	+	3013	-	NBS	-	-	-	VITMroTrayshed_v2.0.hap1.chr18.ver2.0.g235180.p01 VITMroTrayshed_v2.0.hap1.chr18.ver2.1.g235202.p01	-	-	-	-	-	-	-	-
VITMroTrayshed_v2.0.hap2.chr18.ver2.1.g475681.t01	VITMroTrayshed_v2.1.hap2.chr18	24539635	24543749	+	4115	-	TIR-NBS-LRR	-	-	-	-	-	-	-	-	-	-	-	-
VITMroTrayshed_v2.0.hap2.chr18.ver2.1.g475682.t01	VITMroTrayshed_v2.1.hap2.chr18	24558906	24563918	+	5013	-	TIR-NBS-LRR	Partial duplication	-	VITMroTrayshed_v2.0.hap2.chr18.ver2.1.g475691.p01	VITMroTrayshed_v2.0.hap1.chr18.ver2.1.g235270.p01	-	-	-	-	-	-	-	-
VITMroTrayshed_v2.0.hap2.chr18.ver2.1.g475691.t01	VITMroTrayshed_v2.1.hap2.chr18	24589208	24594094	+	4887	-	TIR-NBS-LRR	-	-	VITMroTrayshed_v2.0.hap2.chr18.ver2.1.g475682.p01	VITMroTrayshed_v2.0.hap1.chr18.ver2.1.g235270.p01	-	-	-	-	-	-	-	-
VITMroTrayshed_v2.0.hap2.chr18.ver2.1.g475810.t01	VITMroTrayshed_v2.1.hap2.chr18	24699196	24718159	-	18964	-	NBS-LRR	-	-	-	VITMroTrayshed_v2.0.hap1.chr18.ver2.1.g235400.p01 VITMroTrayshed_v2.0.hap1.chr18.ver2.1.g235401.p01	-	-	-	-	-	-	-	-
VITMroTrayshed_v2.0.hap2.chr18.ver2.1.g475812.t01	VITMroTrayshed_v2.1.hap2.chr18	24726703	24742311	-	15609	-	TIR-NBS-LRR	-	-	-	-	-	-	-	-	-	-	-	-
VITMroTrayshed_v2.0.hap2.chr18.ver2.1.g475881.t01	VITMroTrayshed_v2.1.hap2.chr18	24834931	24835701	+	771	-	NBS	-	-	-	VITMroTrayshed_v2.0.hap1.chr18.ver2.1.g235511.p01	-	-	-	-	-	-	-	-
VITMroTrayshed_v2.0.hap2.chr18.ver2.1.g475882.t01	VITMroTrayshed_v2.1.hap2.chr18	24849998	24857161	+	7164	-	TIR-NBS-LRR	-	-	-	VITMroTrayshed_v2.0.hap1.chr18.ver2.0.g235550.p01 VITMroTrayshed_v2.0.hap1.chr18.ver2.1.g235581.p01	-	-	-	-	-	-	-	-
VITMroTrayshed_v2.0.hap2.chr18.ver2.1.g475900.t01	VITMroTrayshed_v2.1.hap2.chr18	24886616	24893772	+	7157	-	TIR-NBS-LRR	Hemizygous / Completely deleted in alternative haplotype	-	-	-	-	-	-	-	-	-	-	-
VITMroTrayshed_v2.0.hap2.chr18.ver2.1.g475971.t01	VITMroTrayshed_v2.1.hap2.chr18	25031459	25032432	-	974	-	NBS	-	-		VITMroTrayshed_v2.0.hap1.chr18.ver2.1.g235721.p01 VITMroTrayshed_v2.0.hap1.chr18.ver2.1.g235731.p01	-	-	-	-	-	-	-	-
VITMroTrayshed_v2.0.hap2.chr18.ver2.0.g476000.t01	VITMroTrayshed_v2.1.hap2.chr18	25115553	25120506	-	4954	-	TIR-NBS-LRR	Hemizygous / Completely deleted in alternative haplotype	-	-	-	-	-	-	-	-	-	-	-
VITMroTrayshed_v2.0.hap2.chr18.ver2.0.g476010.t01	VITMroTrayshed_v2.1.hap2.chr18	25137524	25144183	-	6660	-	TIR-NBS-LRR	Hemizygous / Completely deleted in alternative haplotype	-	-	-	-	-	-	-	-	-	-	-
VITMroTrayshed_v2.0.hap2.chr18.ver2.1.g476021.t01	VITMroTrayshed_v2.1.hap2.chr18	25179505	25186422	-	6918	-	TIR-NBS-LRR		-	VITMroTrayshed_v2.0.hap2.chr18.ver2.1.g476030.p01	VITMroTrayshed_v2.0.hap1.chr18.ver2.1.g235741.p01	-	-	-	-	-	-	-	-
VITMroTrayshed_v2.0.hap2.chr18.ver2.1.g476030.t01	VITMroTrayshed_v2.1.hap2.chr18	25227701	25237993	-	10293	-	TIR-NBS-LRR	Partial duplication	-	VITMroTrayshed_v2.0.hap2.chr18.ver2.1.g476021.p01	VITMroTrayshed_v2.0.hap1.chr18.ver2.1.g235741.p01	-	-	-	-	-	-	-	-
UDV108	VITMroTrayshed_v2.1.hap2.chr18	25934951	25935273	+	323	-
